# Supplementary material
Source: PubMed Central journal article supplement (PMC7250629)

# Merging Chemoenzymatic and Radical-Based Retrosynthetic Logic For Rapid and Modular Synthesis of Oxidized Meroterpenoids

Jian Li,<sup>+</sup> Fuzhuo Li,<sup>+</sup> Emma King-Smith,<sup>+</sup> Hans Renata\*

*Contribution from the Department of Chemistry, The Scripps Research Institute, 130 Scripps Way, Jupiter, FL 33458*

## SUPPLEMENTARY INFORMATION

### Table of Contents

|                                                                   |      |    |
|-------------------------------------------------------------------|------|----|
| General materials and methods .....                               | page | 2  |
| Protein and DNA sequences .....                                   | page | 3  |
| Generation of enzyme variants .....                               | page | 5  |
| Amino acid sequences .....                                        | page | 6  |
| NADPH consumption assay .....                                     | page | 6  |
| Product formation assay .....                                     | page | 6  |
| Substrate binding assay .....                                     | page | 6  |
| General synthetic procedures .....                                | page | 7  |
| Initial screen of enzyme variants .....                           | page | 8  |
| Synthetic procedures .....                                        | page | 8  |
| Screening of enzyme variants for hydroxylation of <b>31</b> ..... | page | 23 |
| Substrate binding and kinetic data for hydroxylation .....        | page | 24 |
| Table 1 .....                                                     | page | 31 |
| Table 2 .....                                                     | page | 32 |
| Table 3 .....                                                     | page | 33 |
| Table 4 .....                                                     | page | 34 |
| Table 5 .....                                                     | page | 35 |
| Table 6 .....                                                     | page | 36 |
| Table 7 .....                                                     | page | 37 |
| Table 8 .....                                                     | page | 38 |
| Table 9 .....                                                     | page | 39 |
| References .....                                                  | page | 40 |
| Spectral data .....                                               | page | 44 |

### ***General materials and methods***

Unless otherwise noted, all chemicals and reagents for chemical reactions were purchased at the highest commercial quality and used without further purification. Reactions were monitored by thin layer chromatography (TLC) and liquid chromatography/mass spectrometry (LC/MS). TLC was performed with 0.25 mm E. Merck silica plates (60F-254) using short-wave UV light as the visualizing agent, and ninhydrin,  $\text{KMnO}_4$ , ammonium molybdate, or phosphomolybdic acid and heat as developing agents. LC/MS was performed with Agilent 1260 Infinity System equipped with Poroshell 120 EC-C18 column (3.0 x 50 mm, 2.7 micron). NMR spectra were recorded on a Bruker AVANCE AV400 (400 MHz and 100 MHz) or Bruker AVANCE AV600 (600 MHz and 151 MHz). Signal positions were recorded in ppm with the abbreviations s, d, t, q, br, m and app denoting singlet, doublet, triplet, quartet, broad, multiplet and apparent respectively. All NMR chemical shifts were referenced to residual solvent peaks or to  $\text{Si}(\text{CH}_3)_4$  as an internal standard. Spectra recorded in  $\text{CDCl}_3$  were referenced to residual  $\text{CHCl}_3$  at 7.26 ppm for  $^1\text{H}$  or 77.16 ppm for  $^{13}\text{C}$ , and spectra recorded in  $\text{CD}_3\text{OD}$  were referenced to residual  $\text{CD}_2\text{HOD}$  at 3.31 ppm for  $^1\text{H}$  or 49.00 ppm for  $^{13}\text{C}$ . All coupling constants  $J$  are quoted in Hz. Optical rotations were measured on Autopol IV polarimeter (Rudolph Research Analytical). Enzymes (DpnI, Phusion polymerase) were purchased from New England Biolabs (NEB, Ipswich, MA). Sonication was performed using a Qsonica Q500 sonicator. Biochemicals and media components were purchased from standard commercial sources.

### *Protein and DNA Sequences*

The original plasmid encoding for P450<sub>BM3</sub> variant 1857 was a generous donation from Prof. Frances H. Arnold. Protein sequence of P450<sub>BM3</sub> variant 1857:

HMTIKEMPQPKTFGELKNLPLLNTDKPVQALMKIADELGEIFKFEAPGRVTRYSSQRLIKEACDESFRDK  
 NLSQALKFARDFGGDGLVTSWTHEKNWKAHNILLPSFSQQAMKGYHAMMVDIAVQLVQKWERLNADEHI  
 EVSEDMTRLTLDTIGLCGFNYRFNSFYRDQPHPFIIISMVRALDEV MNKLQ RANPDDPAYDENKRQCQEDI  
 KVMNDLVDKIIADR KARGEQSDDL LTQMLNGKDPETGEPLDDGNISYQIITFLIAGHETTSGLLSFALYF  
 LVKNPHVLQKVAEEAARVLVDPVPSYKQVKQLKYVGMVLNEALRLWPTVPAFSLYAKEDTVLGGEYPLEK  
 GDEVMVLIPQLHRDKTIWGDDVEEFRPERFENPSAIPQHAFKPFNGQQRACIGQQFALHEATLVLGMMLK  
 HFD FEDHTNYELDIKETLTLKPEGFVVKAKSKKIPLGGIPSPSTEQSAKKVRKKAENAHNTPLLVLVYGSN  
 MGTAEGTARDLADIAMSKGFAPQVATLDSHAGNLPREGAVLIVTASYN GHPPDNAKQFVDWLDQASADEV  
 KGVRYSVFGCGDKNWATTYQKVPAFIDETLAAGAENIADRGEADASDDFEGTYEEWREHMWSDVAAYFN  
 LDIENSEDNKSTLSLQFVDSAADMPLAKMHGAFSTNVVASKELQQPGSARSTRHLEIELPK EASYQEGDH  
 LGVIPRNYEGIVNRVTARFGLDASQQIRLEAEE EKLAHLPLAKTVSVEELLQYVELQDPVTRTQLRAMAA  
 KTVCPPHKVELEALLEKQAYKEQVLAKRLTMLELLEKYPACEMKFSEFIALLP SIRPRYYSISSSPRVDE  
 KQASITVSVVSGEAWSGYGEYKGIASNYLAELQEGDTITCFISTPQSEFTLPKDPETPLIMVGP GTGVAP  
 FRGFVQARKQLKEQGQSLGEAHL YFGCRSPHEDYLYQEEL ENAQSEGIITLHTAFSRMPNQPKTYVQHVM  
 EQDGKKLIELLDQGAHFYICGDGSQMAPAVEATLMKSYADVHQVSEADARLWLQOLEEKGRYAKDVWAG

Variant 1857 contains the following mutations relative to WT P450<sub>BM3</sub>: V78A, A82G, F87V, P142S, T175I, A184V, F205C, S226R, H236Q, E252G, R255S, A290V, L353V.

DNA sequence of P450<sub>BM3</sub> variant 1857:

CATATGACAATTAAAGAAATGCCTCAGCCAAAAACGTTTGGAGAGCTTAAAAATTTACCGTTATTAAACA  
 CAGATAAACCGGTTCAAGCTTTGATGAAAATTGCGGATGAATTAGGAGAAATCTTTAAATTCGAGGCGCC  
 TGGTCGTGTAACGCGCTACTTATCAAGTCAGCGTCTAATTAAAGAAGCATGCGATGAATCACGCTTTGAT  
 AAAA ACTTAAGTCAAGCGCTTAAATTCGCGCGTGATTTTGGCGGAGACGGGT TAGTTACAAGCTGGACGC  
 ATGAAAAAAATTGGAAAAAAGCGCATAATATCTTACTTCCAAGCTTTAGTCAGCAGGCAATGAAAGGCTA  
 TCATGCGATGATGGTTCGATATCGCCGTGCAGCTTGTTCAAAAGTGGGAGCGTCTAAATGCAGATGAGCAT  
 ATTGAAGTATCGGAAGACATGACACGTTTAAACGCTTGATACAATTGGTCTTTGCGGCTTTAACTATCGCT  
 TTAACAGCTTTTACCGAGATCAGCCTCATCCATTTATTATAAGTATGGTCCGTGCACTGGATGAAGTAAT

GAACAAGCTGCAGCGAGCAAATCCAGACGACCCAGCTTATGATGAAAAACAAGCGCCAGTGTCAAGAAGAT  
ATCAAGGTGATGAACGACCTAGTAGATAAAATTATTGCAGATCGCAAAGCAAGGGGTGAACAAAGCGATG  
ATTTATTAACGCAGATGCTAAACGGAAAAGATCCAGAAACGGGTGAGCCGCTTGATGACGGGAACATTAG  
CTATCAAATTATTACATTCTTAATTGCGGGACACGAAACAACAAGTGGTCTTTTATCATTTGCGCTGTAT  
TTCTTAGTGAAAAATCCACATGTATTACAAAAAGTAGCAGAAGAAGCAGCACGAGTTCTAGTAGATCCTG  
TTCCAAGCTACAAACAAGTCAAACAGCTTAAATATGTCGGCATGGTCTTAAACGAAGCGCTGCGCTTATG  
GCCAACTGTTCTGCGTTTTCCCTATATGCAAAAGAAGATACGGTGCTTGGAGGAGAATATCCTTTAGAA  
AAAGGCGACGAAGTAATGGTTCTGATTCTCAGCTTCACCGTGATAAAACAATTTGGGGAGACGATGTGG  
AGGAGTTCCGTCCAGAGCGTTTTGAAAATCCAAGTGCGATTCCGCAGCATGCGTTTAAACCGTTTTGGAAA  
CGGTCAGCGTGCGTGTATCGGTCAGCAGTTTCGCTCTTCATGAAGCAACGCTGGTACTTGGTATGATGCTA  
AAACACTTTGACTTTGAAGATCATACAACTACGAGCTCGATATTAAAGAACTTTAACGTTAAACCTG  
AAGGCTTTGTGGTAAAAGCAAAATCGAAAAAAATTCCGCTTGGCGGTATTCTTTCACCTAGCACTGAACA  
GTCTGCTAAAAAAGTACGCAAAAAGGCAGAAAACGCTCATAATACGCCGCTGCTTGTGCTATACGGTTCA  
AATATGGGAACAGCTGAAGGAACGGCGCGTGATTTAGCAGATATTGCAATGAGCAAAGGATTTGCACCGC  
AGGTCGCAACGCTTGATTACACGCCGGAATCTTCCGCGCGAAGGAGCTGTATTAATTGTAACGGCGTC  
TTATAACGGTCATCCGCTGATAACGCAAAGCAATTTGTGCGACTGGTTAGACCAAGCGTCTGCTGATGAA  
GTAAAAGGCGTTCGCTACTCCGTATTTGGATGCGGCGATAAAAACTGGGCTACTACGTATCAAAAAGTGC  
CTGCTTTTATCGATGAAACGCTTGCCGCTAAAGGGGCAGAAAACATCGCTGACCGCGGTGAAGCAGATGC  
AAGCGACGACTTTGAAGGCACATATGAAGAATGGCGTGAACATATGTGGAGTGACGTAGCAGCCTACTTT  
AACCTCGACATTGAAAACAGTGAAGATAATAAATCTACTCTTCACTTCAATTTGTGCGACAGCGCCGCGG  
ATATGCCGCTTGCGAAAAATGCACGGTGCGTTTTCAACGAACGTCGTAGCAAGCAAAGAACTTCAACAGCC  
AGGCAGTGCACGAAGCACGCGACATCTTGAAATTGAACTTCCAAAAGAAGCTTCTTATCAAGAAGGAGAT  
CATTTAGGTGTTATTCTCGCAACTATGAAGGAATAGTAAACCGTGTAACAGCAAGGTTTCGGCCTAGATG  
CATCACAGCAAATCCGTCTGGAAGCAGAAGAAGAAAAATTAGCTCATTTGCCACTCGCTAAAAACAGTATC  
CGTAGAAGAGCTTCTGCAATACGTGGAGCTTCAAGATCCTGTTACGCGCACGCAGCTTCGCGCAATGGCT  
GCTAAAACGGTCTGCCCCGCCGATAAAGTAGAGCTTGAAGCCTTGCTTGAAAAGCAAGCCTACAAAGAAC  
AAGTGCTGGCAAAACGTTTAAACAATGCTTGAAGTGTGAAAAATACCCGGCGTGTGAAATGAAATTCAG  
CGAATTTATCGCCCTTCTGCCAAGCATACGCCGCGCTATTACTCGATTTCTTCATCACCTCGTGTGCGAT  
GAAAAACAAGCAAGCATCACGGTCAGCGTTGTCTCAGGAGAAGCGTGGAGCGGATATGGAGAATATAAAG  
GAATTGCGTCGAACTATCTTGCCGAGCTGCAAGAAGGAGATACGATTACGTGCTTTATTTCCACACCGCA  
GTCAGAATTTACGCTGCCAAAAGACCCTGAAACGCCGCTTATCATGGTCGGACCGGGAACAGGCGTCGCG  
CCGTTTAGAGGCTTTGTGCAGGCGCGCAAACAGCTAAAAGAACAAGGACAGTCACTTGGAGAAGCACATT

TATACTTCGGCTGCCGTTACCTCATGAAGACTATCTGTATCAAGAAGAGCTTGAAAACGCCCAAAGCGA  
 AGGCATCATTACGCTTCATACCGCTTTTTCTCGCATGCCAAATCAGCCGAAAACATACGTTTCAGCACGTA  
 ATGGAACAAGACGGCAAGAAATTGATTGAACTTCTTGATCAAGGAGCGCACTTCTATATTTGCGGAGACG  
 GAAGCCAAATGGCACCTGCCGTTGAAGCAACGCTTATGAAAAGCTATGCTGACGTTACCAAGTGAGTGA  
 AGCAGACGCTCGCTTATGGCTGCAGCAGCTAGAAGAAAAAGGCCGATACGCAAAAGACGTGTGGGCTGGG

Plasmid pET15b-Opt13 was a gift from Prof. Huimin Zhao (Addgene plasmid # 61698; <http://n2t.net/addgene:61698>; RRID:Addgene 61698).

### ***Generation of enzyme variants***

The aforementioned DNA sequence for variant 1857 was inserted between the NdeI and XhoI restriction sites of pET22b(+) vector. The resulting vector was used as a cloning and expression vector for all P450<sub>BM3</sub> variants described in this study. Site-directed mutagenesis for alanine scanning was performed by using standard QuikChange PCR method with primers containing the desired alanine mutation at the desired position(s). The resulting PCR products were digested with DpnI, gel purified, repaired using NEBuilder HiFi DNA assembly (NEB, product number: E2621), and used directly to transform electrocompetent *E. coli* BL21(DE3) (Lucigen, product number: 60300). Variants were stored as glycerol stocks at –80 °C.

For compatible co-expression with pET22b(+)-based expression vector, the gene encoding for Opt13 was subcloned from pET15b-Opt13 into pRSF-1b vector, inserting between NcoI and XhoI restriction sites to yield vector pRSF-Opt13. For co-expression of P450<sub>BM3</sub> variants and Opt13, the pET22b(+)-based vector encoding for the appropriate P450<sub>BM3</sub> variant and pRSF-Opt13 were used to co-transform electrocompetent *E. coli* strain BL21(DE3). Variants were stored as glycerol stocks at –80 °C.

### ***Amino Acid Sequences***

Amino acid sequences of mutants, relative to variant 1857.

| <i>Variant</i> | <i>Amino acid substitution(s)</i> |
|----------------|-----------------------------------|
| MERO1          | V328A                             |
| MERO2          | T235A V328A R471A                 |

|       |                 |
|-------|-----------------|
| MERO3 | R47C K94I V328A |
|-------|-----------------|

### *NADPH consumption assay*

To a cuvette containing 0.5  $\mu\text{M}$  of purified P450 variant in 890  $\mu\text{L}$  of 50 mM kPi buffer (pH 8.0) was added a pre-dissolved solution of substrate in DMSO (10  $\mu\text{L}$  of 100 mM stock solution for a final concentration of 1 mM). A solution of NADPH in pH 8.0 kPi buffer (100  $\mu\text{L}$  of 3 mM stock solution for a final concentration of 300  $\mu\text{M}$ ) was added to the mixture, and the change in absorbance at 340 nm was measured. The rate of NADPH consumption was calculated using  $\epsilon_{340} = 6.22 \text{ mM}^{-1}\text{cm}^{-1}$ .

### *Product formation assay*

An enzymatic reaction containing 0.5  $\mu\text{M}$  of purified P450 variant and 2 mM substrate in 10 mL of 50 mM kPi buffer (pH = 8.0) was initiated by the addition of NADPH at 5 mM final concentration. A 1 mL aliquot of the reaction was sampled at various time intervals (15 s to 1 h), extracted with EtOAc, and analyzed for product formation by  $^1\text{H}$  NMR.

### *Substrate binding assay*

In a cuvette, a solution of 2.5  $\mu\text{M}$  of the appropriate P450 variant in 1 mL of 50 mM kPi buffer (pH 8.0) was prepared and was used to baseline the spectrophotometer. Aliquots of substrate (0.5-2.5  $\mu\text{L}$ ) from 1 to 100 mM stock solution in DMSO were added to the mixture and the type I difference spectra were recorded until no further change could be detected in the peak-to-trough difference ( $A_{390}$  and  $A_{422}$ ). Dissociation constant values ( $K_d$ ) were calculated based on nonlinear regression of  $\Delta A_{\text{obs}} = \Delta A_{\text{max}} \times [\text{S}] / (K_d + [\text{S}])$  where  $\Delta A_{\text{obs}}$ ,  $\Delta A_{\text{max}}$ , and  $[\text{S}]$  represent the observed absorption difference at  $A_{390}$  and  $A_{422}$ , the extrapolated maximum absorption difference at  $A_{390}$  and  $A_{422}$ , and substrate concentration, respectively.

### *General synthetic procedures*

#### **Synthesis of Coupling Partners:**

Known literature methods were used to synthesize the [3+3] coupling partners **19**<sup>51</sup>, **20**<sup>51</sup>, and **21**<sup>52</sup>, the nickel cross coupling partners **36**<sup>53</sup> and **37**<sup>54</sup>, and the [3+2] coupling partner **39**<sup>55</sup>.

**Preparation of clarified lysate of *E. coli* expressing P450<sub>BM3</sub> variant and Opt13 for terpene hydroxylation:**

An overnight culture of BL21(DE3) *E. coli* cells harboring pET-22b(+)-based vector for expression of P450<sub>BM3</sub> variant and pRSF-Opt13 plasmid was used to inoculate 400 mL TB media (in 2L Erlenmeyer flasks) containing 50  $\mu$ g/mL kanamycin, 50  $\mu$ g/mL ampicillin, and 0.1% by volume of trace metal mix (aqueous solution of 50 mM FeCl<sub>3</sub>, 20 mM CaCl<sub>2</sub>, 10 mM MnSO<sub>4</sub>, 10 mM ZnSO<sub>4</sub>, 2 mM CoSO<sub>4</sub>, 2 mM CuCl<sub>2</sub>, 2 mM NiCl<sub>2</sub>, 2 mM Na<sub>2</sub>MoO<sub>4</sub>, 2 mM H<sub>3</sub>BO<sub>3</sub>). The cultures were shaken at 250 rpm at 37 °C until an optical density of OD<sub>600</sub> = 0.7 – 1.0 was reached. The cultures were cooled on ice for 20 minutes and then induced with 5-aminolevulinic acid and IPTG to final concentrations of 1.0 mM and 0.5 mM, respectively. The cultures were shaken at 250 rpm at 20 °C for a further 20 hours. Cells were harvested by centrifugation (4 °C, 15 min, 4200 rpm), resuspended in 50 mM kPi (pH = 8.00) to an OD<sub>600</sub> = 15, lysed by sonification (3 minutes, 1 second on, 4 seconds off, 50% amplitude), and pelleted by centrifugation (4 °C, 15 min, 4200 rpm). The supernatant was used directly for subsequent reactions.

The P450 concentration in the lysate was approximated by hemochrome binding assay. Briefly, a solution of pyridine was made by combining 1.75 mL pyridine with 0.75 mL 1 M NaOH. The solution mixed at room temperature was centrifuged for 30 s at 4200 rpm to remove excess aqueous base. To a cuvette containing 0.75 mL of lysate, 0.25 mL of the pyridine solution was added followed by a few grains (less than 2.0 mg) of sodium dithionite. The cuvette was sealed with parafilm and a UV-vis spectrum was recorded immediately. P450 concentration was determined from the absorbance of the hemochrome complex using extinction coefficient  $\epsilon_{418} = 196 \text{ mM}^{-1} \text{ cm}^{-1}$ . Absorbance was assigned as the difference between the peak max at 418 nm and the baseline at 420 nm as determined by extrapolating from two points on either side of the hemochrome peak. The expression and lysis conditions outlined above were found to consistently yield *ca.* 1  $\mu$ M of P450.

### ***Initial screen of enzyme variants***

Clarified lysates containing the desired enzyme variants were prepared from 50 mL expression cultures according to the procedure described above.

A scintillation vial was charged with 4 mL of clarified lysate, followed sequentially by a pre-dissolved solution of (+)-sclareolide or sclareol (24  $\mu$ mol, 1.0 equiv) in 0.20 mL DMSO, NaNADP•4H<sub>2</sub>O (4.1 mg, 4.8  $\mu$ mol, 0.20 equiv) and Na<sub>2</sub>HPO<sub>3</sub>•5H<sub>2</sub>O (104 mg, 0.48 mmol, 20.0 equiv). The vial was shaken at 150 rpm at 20 °C for 20 hours, then quenched with 1 M HCl (400  $\mu$ L), and centrifuged (4 °C, 15 min, 4200 rpm). The supernatant was extracted with EtOAc (4 mL x 2), and the combined organic extracts were

concentrated *in vacuo*. Percentage conversion of the reaction was calculated based on  $^1\text{H}$  NMR analysis of product:starting material ratio.

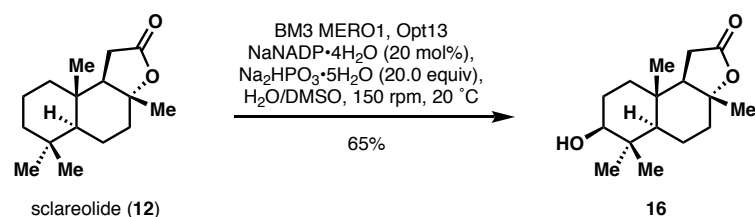

Four 2 L Erlenmeyer flasks were each charged with 400 mL of clarified lysate of *E. coli* expressing P450<sub>BM3</sub> MERO1 and Opt13. A pre-dissolved solution of (+)-sclareolide (**12**) (600 mg, 2.40 mmol, 1.0 equiv) in 20 mL DMSO was added to the lysate, which became immediately cloudy. Each flask was then charged with NaNADP•4H<sub>2</sub>O (406 mg, 0.48 mmol, 0.20 equiv) and Na<sub>2</sub>HPO<sub>3</sub>•5H<sub>2</sub>O (10.36 g, 48.0 mmol, 20.0 equiv). The flasks were shaken at 150 rpm at 20 °C for 20 hours, then quenched with 1 M HCl (40 mL per flask), and centrifuged (4 °C, 15 min, 4200 rpm). The supernatant was extracted with EtOAc (400 mL × 3) and the combined extracts were washed with brine, dried over anhydrous Na<sub>2</sub>SO<sub>4</sub>, and concentrated. The crude material was purified by flash column chromatography (1:1 hexanes:EtOAc) to yield **16** (1.66 g, 65% yield) as a white solid.

**$^1\text{H}$  NMR (400 MHz, CDCl<sub>3</sub>):**  $\delta$  3.23 (dd,  $J$  = 11.2, 5.2 Hz, 1H), 2.40 (dd,  $J$  = 16.2, 14.8 Hz, 1H), 2.21 (dd,  $J$  = 16.2, 6.5 Hz, 1H), 2.06 (dt,  $J$  = 11.9, 3.3 Hz, 1H), 1.95 – 1.82 (m, 2H), 1.72 – 1.57 (m, 4H), 1.48 – 1.36 (m, 2H), 1.31 (d,  $J$  = 1.0 Hz, 3H), 1.21 – 1.09 (m, 1H), 1.01 – 0.96 (s+m, 3H+1H), 0.89 (d,  $J$  = 0.9 Hz, 3H), 0.78 (s, 3H).

**$^{13}\text{C}$  NMR (101 MHz, CDCl<sub>3</sub>):**  $\delta$  176.7, 86.3, 78.6, 58.9, 55.3, 38.9, 38.5, 37.7, 35.8, 28.8, 27.9, 26.8, 21.6, 20.3, 15.2, 15.1

**HRMS (ESI):** calcd for C<sub>16</sub>H<sub>26</sub>O<sub>3</sub>H<sup>+</sup> ([M+H]) 267.1955, found 267.1950

**$[\alpha]_{\text{D}}^{25}$**  = +46.7 ( $c$  = 1.0, CHCl<sub>3</sub>)

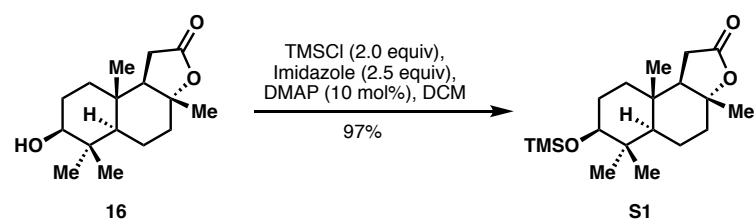

A solution of **16** (4.10 g, 15.4 mmol, 1.0 equiv) in dry DCM (150 mL) was treated with imidazole (2.62 g, 38.5 mmol, 2.5 equiv), DMAP (188 mg, 1.54 mmol, 10 mol%), and TMSCl (3.92 mL, 30.8 mmol, 2.0

equiv). The reaction was stirred at room temperature for 30 minutes, then quenched with sat. aq.  $\text{NH}_4\text{Cl}$  (80 mL) and extracted with DCM (150 mL  $\times$  3). The combined organic extracts were washed with brine, dried over anhydrous  $\text{Na}_2\text{SO}_4$ , filtered, and concentrated *in vacuo*. The crude material was purified by flash column chromatography (20:1 hexanes:EtOAc) to yield **S1** (5.05 g, 97% yield) as a white solid.

**$^1\text{H}$  NMR (600 MHz,  $\text{CDCl}_3$ ):**  $\delta$  3.21 (dd,  $J$  = 11.5, 4.7 Hz, 1H), 2.41 (dd,  $J$  = 16.2, 14.8 Hz, 1H), 2.22 (dd,  $J$  = 16.2, 6.5 Hz, 1H), 2.07 (dt,  $J$  = 12.0, 3.3 Hz, 1H), 1.94 – 1.84 (m, 2H), 1.73 – 1.63 (m, 2H), 1.57 – 1.51 (m, 1H), 1.46 – 1.38 (m, 2H), 1.33 (s, 3H), 1.14 (td,  $J$  = 13.3, 3.8 Hz, 1H), 0.99 (dd,  $J$  = 12.6, 2.8 Hz, 1H), 0.91 (s, 3H), 0.89 (s, 3H), 0.76 (s, 3H), 0.10 (s, 9H).

**$^{13}\text{C}$  NMR (151 MHz,  $\text{CDCl}_3$ ):**  $\delta$  176.8, 86.4, 79.4, 59.1, 55.5, 39.3, 38.6, 37.8, 35.8, 28.9, 28.4, 27.4, 21.6, 20.6, 15.6, 15.3, 0.6.

**HRMS (ESI):** calcd for  $\text{C}_{19}\text{H}_{34}\text{O}_3\text{SiH}^+$  ( $[\text{M}+\text{H}]$ ) 339.2350, found 339.2351

**$[\alpha]_D^{25}$**  =  $-69.5$  ( $c$  = 1.4,  $\text{CHCl}_3$ )

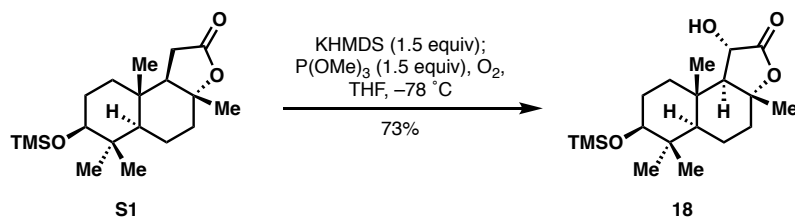

A solution of **S1** (4.80 g, 14.2 mmol, 1.0 eq) in dry THF (140 mL) was treated with 0.5 M KHMDS solution in toluene (42.6 mL, 21.3 mmol, 1.5 equiv) dropwise at  $-78^\circ\text{C}$ . After stirring at  $-78^\circ\text{C}$  for 1.5 hours,  $\text{P(OMe)}_3$  (2.52 mL, 21.3 mmol, 1.5 equiv) was added dropwise and  $\text{O}_2$  was bubbled into the reaction. After 30 minutes, the  $\text{O}_2$  balloon was raised above the solvent level and the reaction was stirred for a further 1 hour at  $-78^\circ\text{C}$  under  $\text{O}_2$  atmosphere. The reaction was quenched with sat. aq.  $\text{NH}_4\text{Cl}$  (80 mL) and extracted with EtOAc (150 mL  $\times$  3). The combined organic extracts were washed with brine, dried over anhydrous  $\text{Na}_2\text{SO}_4$ , filtered, and concentrated *in vacuo*. The crude material was purified by flash column chromatography (3:1 hexanes:EtOAc) to yield **18** (3.67 g, 73% yield) as a white solid.

**$^1\text{H}$  NMR (600 MHz,  $\text{CDCl}_3$ ):**  $\delta$  4.49 (d,  $J$  = 12.4 Hz, 1H), 3.22 (dd,  $J$  = 11.2, 4.6 Hz, 1H), 2.59 (br. s, 1H), 2.05 (dt,  $J$  = 11.9, 3.3 Hz, 1H), 1.93 – 1.85 (m, 2H), 1.75 – 1.64 (m, 3H), 1.59 – 1.53 (m, 1H), 1.47 – 1.39 (m, 1H), 1.37 (s, 3H), 1.32 (td,  $J$  = 13.3, 3.6 Hz, 1H), 1.04 – 0.98 (s+m, 3H+1H), 0.90 (s, 3H), 0.77 (s, 3H), 0.09 (s, 9H).

**$^{13}\text{C}$  NMR (151 MHz,  $\text{CDCl}_3$ ):**  $\delta$  178.3, 83.5, 79.3, 68.6, 64.5, 55.3, 39.4, 39.2, 37.6, 36.5, 28.4, 27.3, 23.4, 20.7, 16.1, 15.6, 0.6.

**HRMS (ESI):** calcd for  $C_{19}H_{34}O_4SiH^+$  ( $[M+H]^+$ ) 355.2299, found 355.2290

$[\alpha]_D^{25} = -8.5$  ( $c = 1.0$ ,  $CHCl_3$ )

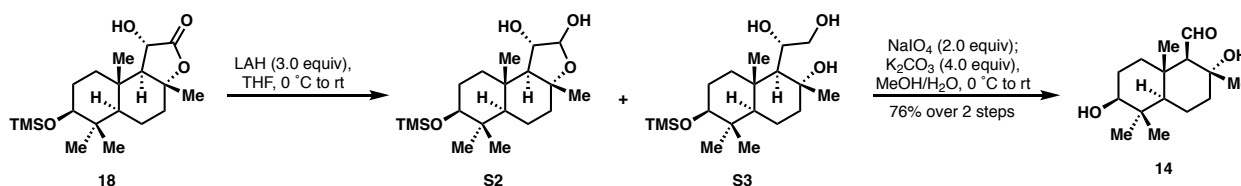

A solution of **18** (1.56 g, 4.4 mmol, 1.0 equiv) in dry THF (50 mL) was treated with LiAlH<sub>4</sub> (500 mg, 13.2 mmol, 3.0 equiv) at 0 °C. The reaction was warmed to room temperature over 30 minutes, then quenched with sat. aq. potassium sodium tartrate (50 mL) at 0 °C and stirred overnight at room temperature. The mixture was extracted with EtOAc (50 mL  $\times$  3). The combined organic extracts were washed with brine, dried over anhydrous Na<sub>2</sub>SO<sub>4</sub>, filtered, and concentrated *in vacuo*. The crude mixture of **S2** and **S3** was then dissolved in a mixture of MeOH/H<sub>2</sub>O (5:1, 50 mL MeOH, 10 mL H<sub>2</sub>O) and treated with NaIO<sub>4</sub> (1.88 g, 8.8 mmol, 2.0 equiv) at 0 °C. The reaction mixture was warmed to room temperature and stirred for 2 hours, then K<sub>2</sub>CO<sub>3</sub> (2.43 g, 17.6 mmol, 4.0 equiv) was added and the reaction mixture was stirred for an additional 2 hours at room temperature. The solids were removed by filtration and the filtrate was concentrated *in vacuo*. The residue was diluted by DCM (50 mL), quenched with sat. aq. NH<sub>4</sub>Cl (50 mL) and extracted with DCM (50 mL  $\times$  3). The combined organic extracts were washed with brine, dried over anhydrous Na<sub>2</sub>SO<sub>4</sub>, filtered, and concentrated once more *in vacuo*. The crude material was purified by flash column chromatography (2:1 hexanes:EtOAc) to yield **14** (850 mg, 76% yield over 2 steps) as a white solid.

**<sup>1</sup>H NMR (400 MHz, CDCl<sub>3</sub>):**  $\delta$  9.99 (d,  $J = 1.5$  Hz, 1H), 3.25 (dd,  $J = 11.1, 5.3$  Hz, 1H), 2.04 – 2.02 (m, 1H), 1.99 (dt,  $J = 13.1, 3.5$  Hz, 1H), 1.82 (dt,  $J = 11.8, 2.8$  Hz, 1H), 1.74 – 1.60 (m, 3H), 1.50 – 1.40 (m, 1H), 1.40 – 1.34 (s+m, 3H+1H), 1.33 – 1.27 (m, 1H), 1.09 (s, 3H), 0.99 (s, 3H), 0.92 (dd,  $J = 11.8, 2.4$  Hz, 1H), 0.78 (s, 3H).

**<sup>13</sup>C NMR (101 MHz, CDCl<sub>3</sub>):**  $\delta$  207.6, 78.3, 72.7, 71.1, 54.3, 42.8, 39.1, 37.9, 37.2, 28.1, 26.8, 25.3, 19.7, 17.7, 15.4.

**HRMS (ESI):** calcd for  $C_{15}H_{26}O_3HCO_2^-$  ( $[M+HCO_2]^-$ ) 299.1864, found 299.1872

$[\alpha]_D^{25} = +27.6$  ( $c = 1.0$ ,  $CHCl_3$ )

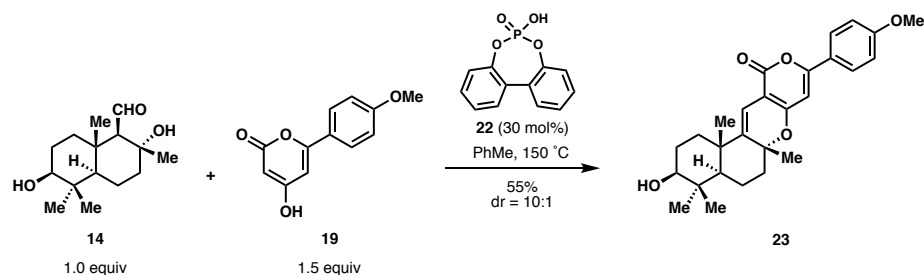

A flame dried microwave vial was charged with **14** (160 mg, 0.63 mmol, 1.0 equiv) in toluene (6 mL), **19** (207 mg, 0.95 mmol, 1.5 equiv), and **22** (47 mg, 0.19 mmol, 30 mol%). The vial was sealed and placed in a pre-heated oil bath at 150 °C for 24 hours. The reaction was cooled to room temperature, the solvent was removed *in vacuo*, and the residue was purified by flash column chromatography (1:1 hexanes:EtOAc) to yield **23** (165 mg, 55% yield, dr = 10:1), as a yellow solid.

**<sup>1</sup>H NMR (400 MHz, CDCl<sub>3</sub>):**  $\delta$  7.75 (d,  $J$  = 9.0 Hz, 2H), 6.93 (d,  $J$  = 9.0 Hz, 2H), 6.34 (s, 1H), 6.26 (s, 1H), 3.85 (s, 3H), 3.25 (dd,  $J$  = 11.5, 4.5 Hz, 1H), 2.23 (dt,  $J$  = 12.7, 3.2 Hz, 1H), 2.03 (dt,  $J$  = 12.9, 3.4 Hz, 1H), 1.92 (td,  $J$  = 13.3, 4.7 Hz, 1H), 1.86 – 1.78 (m, 2H), 1.74 – 1.62 (m, 2H), 1.60 – 1.54 (m, 1H), 1.51 (s, 3H), 1.15 (s, 3H), 1.07 (dd,  $J$  = 12.1, 2.1 Hz, 1H), 1.03 (s, 3H), 0.82 (s, 3H).

**<sup>13</sup>C NMR (101 MHz, CDCl<sub>3</sub>):**  $\delta$  162.9, 162.5, 161.9, 159.9, 146.3, 127.4, 124.1, 114.5, 109.5, 100.3, 96.2, 82.0, 78.5, 55.7, 51.4, 41.4, 39.4, 39.3, 36.4, 28.4, 27.7, 27.3, 23.9, 19.2, 15.7

**HRMS (ESI):** calcd for C<sub>27</sub>H<sub>32</sub>O<sub>5</sub>H<sup>+</sup> ([M+H]) 437.2323, found 437.2326

**$[\alpha]_D^{25}$**  = +40.5 (c = 1.0, CHCl<sub>3</sub>)

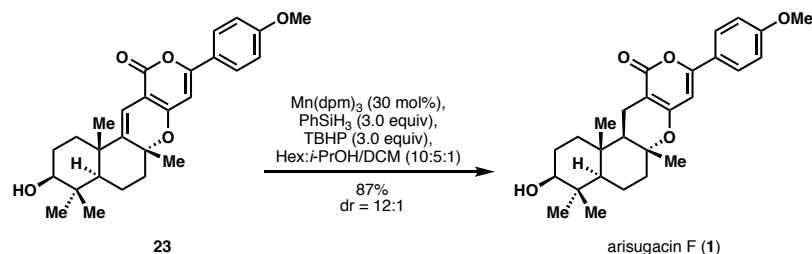

A solution of **23** (15 mg, 0.037 mmol, 1.0 equiv) in dry hexanes/*i*-PrOH/DCM (10:5:1, 1.0 mL hexanes, 0.5 mL *i*-PrOH, 0.1 mL DCM) was treated with phenylsilane (13.6  $\mu$ L, 0.111 mmol, 3.0 equiv), and 5.5 M TBHP in decanes (20.0  $\mu$ L, 0.111 mmol, 3.0 equiv). The solution was degassed with argon via subsurface sparging for 10 minutes, then Mn(dpm)<sub>3</sub> (7 mg, 0.011 mmol, 30 mol%) was added and the reaction was degassed for a further 30 seconds. The solution was stirred for 3 hours, then concentrated *in vacuo* and purified by preparative thin-layer chromatography (1:1 hexanes:EtOAc) to yield arisugacin F (**1**) (13 mg, 87% yield, dr = 12:1) as a white solid.

**<sup>1</sup>H NMR (600 MHz, CDCl<sub>3</sub>):** δ 7.73 (d, *J* = 8.9 Hz, 2H), 6.93 (d, *J* = 8.9 Hz, 2H), 6.25 (s, 1H), 3.85 (s, 3H), 3.25 (dd, *J* = 11.6, 4.7 Hz, 1H), 2.51 (dd, *J* = 16.9, 4.7 Hz, 1H), 2.23 (dd, *J* = 16.9, 12.9 Hz, 1H), 2.16 – 2.09 (m, 1H), 1.84 – 1.81 (m, 1H), 1.81 – 1.78 (m, 1H), 1.73 – 1.70 (m, 1H), 1.69 – 1.66 (m, 1H), 1.65 – 1.61 (m, 1H), 1.49 (dd, *J* = 12.9, 4.9 Hz, 1H), 1.46 – 1.42 (m, 1H), 1.26 (s, 3H), 1.12 (td, *J* = 13.2, 4.0 Hz, 1H), 1.03 (s, 3H), 0.99 (dd, *J* = 12.2, 2.3 Hz, 1H), 0.91 (s, 3H), 0.82 (s, 3H).

**<sup>13</sup>C NMR (151 MHz, CDCl<sub>3</sub>):** δ 164.7, 163.6, 161.5, 158.3, 127.0, 124.0, 114.2, 98.4, 96.8, 80.6, 78.5, 55.4, 55.0, 51.6, 40.4, 38.8, 37.5, 36.9, 28.1, 27.2, 20.7, 19.4, 17.2, 15.5, 15.1.

**HRMS (ESI):** calcd for C<sub>27</sub>H<sub>34</sub>O<sub>5</sub>H<sup>+</sup> ([M+H]) 439.2479, found 439.2471

**[α]<sub>D</sub><sup>25</sup>** = +45.7 (*c* = 1.0, CHCl<sub>3</sub>)

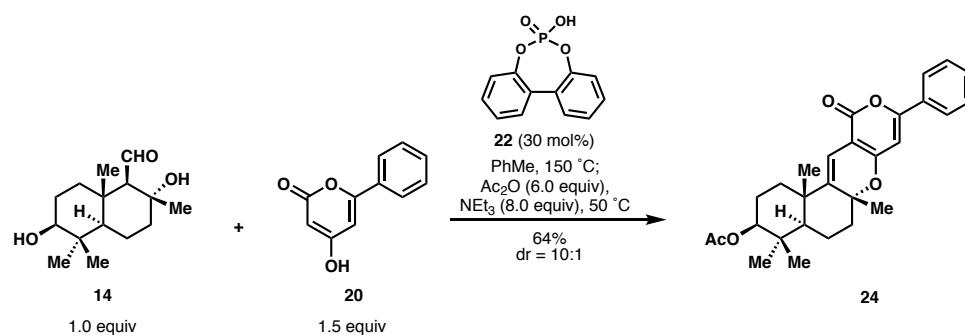

A flame dried microwave vial was charged with **14** (160 mg, 0.63 mmol, 1.0 equiv) in toluene (6 mL), **20** (178 mg, 0.95 mmol, 1.5 equiv), and **22** (47 mg, 0.19 mmol, 30 mol%). The vial was sealed and placed in a pre-heated oil bath at 150 °C for 24 hours. After cooling to room temperature, Ac<sub>2</sub>O (0.36 mL, 3.78 mmol, 6.0 equiv) and NEt<sub>3</sub> (0.70 mL, 5.04 mmol, 8.0 equiv) were added and the reaction was stirred at 50 °C for 2 additional hours. The reaction was cooled to room temperature, quenched with sat. aq. NH<sub>4</sub>Cl (10 mL) and extracted with EtOAc (20 mL × 3). The combined organic extracts were washed with brine, dried over anhydrous Na<sub>2</sub>SO<sub>4</sub>, filtered, and concentrated *in vacuo*. The residue was purified by flash column chromatography (4:1 hexanes:EtOAc) to yield **24** (180 mg, 64% yield, dr = 10:1) as a yellow solid.

**<sup>1</sup>H NMR (400 MHz, CDCl<sub>3</sub>):** δ 7.84 – 7.74 (m, 2H), 7.45 – 7.36 (m, 3H), 6.45 (s, 1H), 6.26 (s, 1H), 4.49 (dd, *J* = 11.3, 4.5 Hz, 1H), 2.23 (dt, *J* = 12.7, 3.3 Hz, 1H), 2.08 – 2.00 (s+m, 3H+1H), 1.92 (td, *J* = 13.3, 4.6 Hz, 1H), 1.86 – 1.78 (m, 2H), 1.77 – 1.67 (m, 1H), 1.67 – 1.53 (m, 2H), 1.50 (s, 3H), 1.19 – 1.11 (s+m, 3H+1H), 0.90 (s, 3H), 0.89 (s, 3H).

**<sup>13</sup>C NMR (101 MHz, CDCl<sub>3</sub>):** δ 170.9, 162.5, 162.1, 159.6, 146.3, 131.4, 130.9, 129.0, 125.6, 109.5, 101.1, 97.7, 81.9, 80.0, 51.3, 41.1, 39.1, 38.1, 35.9, 28.2, 27.1, 23.9, 23.9, 21.4, 18.9, 16.7.

**HRMS (ESI):** calcd for  $C_{28}H_{32}O_5H^+$  ( $[M+H]$ ) 449.2323, found 449.2324

$[\alpha]_D^{25} = +138.2$  ( $c = 1.0$ ,  $CHCl_3$ )

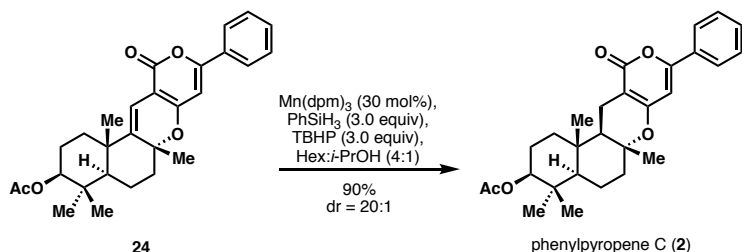

A solution of **24** (19 mg, 0.042 mmol, 1.0 equiv) in dry hexanes/*i*-PrOH (4:1, 1.0 mL hexanes, 0.25 mL *i*-PrOH) was treated with phenylsilane (15.5  $\mu$ L, 0.126 mmol, 3.0 equiv), and 5.5 M TBHP in decanes (23.0  $\mu$ L, 0.126 mmol, 3.0 equiv). The solution was degassed with argon via subsurface sparging for 10 minutes, then  $Mn(dpm)_3$  (8 mg, 0.0126 mmol, 30 mol%) was added and the reaction was degassed for a further 30 seconds. The solution was stirred for 3 hours, then concentrated *in vacuo* and purified by preparative thin-layer chromatography (4:1 hexanes:EtOAc) to yield phenylpyropene C (**2**) (17 mg, 90% yield,  $dr = 20:1$ ) as a pale yellow solid.

**$^1H$  NMR (600 MHz,  $CDCl_3$ ):**  $\delta$  7.82 – 7.75 (m, 2H), 7.47 – 7.38 (m, 3H), 6.37 (s, 1H), 4.51 (dd,  $J = 11.8, 4.7$  Hz, 1H), 2.52 (dd,  $J = 17.3, 4.8$  Hz, 1H), 2.25 (dd,  $J = 17.3, 4.4$  Hz, 1H), 2.13 (dt,  $J = 12.6, 3.2$  Hz, 1H), 2.06 (s, 3H), 1.84 – 1.81 (m, 1H), 1.80 – 1.78 (m, 1H), 1.77 – 1.72 (m, 1H), 1.70 – 1.68 (m, 1H), 1.68 – 1.65 (m, 1H), 1.51 (dd,  $J = 12.9, 4.8$  Hz, 1H), 1.49 – 1.41 (m, 1H), 1.26 (s, 3H), 1.18 (td,  $J = 13.3, 4.1$  Hz, 1H), 1.09 (dd,  $J = 12.2, 2.2$  Hz, 1H), 0.94 (s, 3H), 0.91 (s, 3H), 0.89 (s, 3H).

**$^{13}C$  NMR (151 MHz,  $CDCl_3$ ):**  $\delta$  171.1, 164.7, 163.4, 158.4, 131.7, 130.7, 129.0, 125.6, 99.6, 98.5, 80.7, 80.4, 55.3, 51.7, 40.5, 37.9, 37.4, 37.0, 28.3, 23.7, 21.5, 20.9, 19.5, 17.5, 16.8, 15.4.

**HRMS (ESI):** calcd for  $C_{28}H_{34}O_5H^+$  ( $[M+H]$ ) 451.2479, found 451.2468

$[\alpha]_D^{25} = +42.7$  ( $c = 0.8$ ,  $CHCl_3$ )

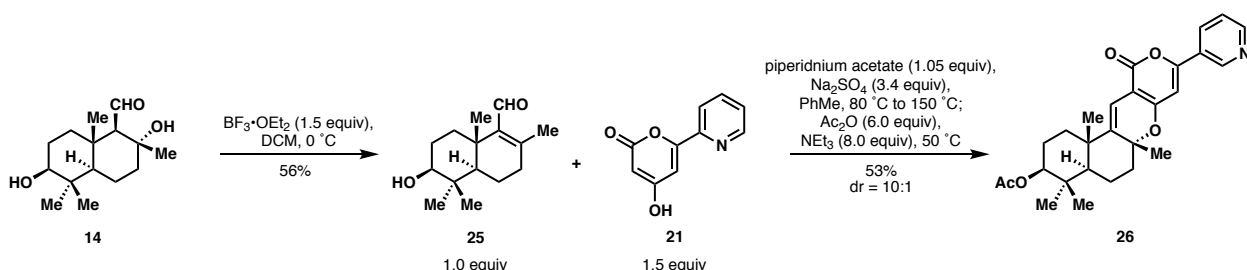

A solution of **14** (250 mg, 1.00 mmol, 1.0 equiv) in dry DCM (10 mL) was treated with  $\text{BF}_3 \cdot \text{OEt}_2$  (0.19 mL, 1.50 mmol, 1.5 equiv) dropwise at 0 °C. After stirring at room temperature for 3 hours, the reaction was quenched with sat. aq.  $\text{NaHCO}_3$  (10 mL) and extracted with DCM (20 mL  $\times$  3). The combined organic extracts were washed with brine, dried over anhydrous  $\text{Na}_2\text{SO}_4$ , filtered, and concentrated *in vacuo*. The crude material was purified by flash column chromatography (1:1 hexanes:EtOAc) to yield enal **25** (132 mg, 56% yield) as a colorless oil. Enal **25** was highly unstable and was used immediately.

A solution of **25** (130 mg, 0.55 mmol, 1.0 equiv) in toluene (6 mL) was treated with piperidinium acetate (84 mg, 0.58 mmol, 1.05 equiv), and sodium sulfate (260 mg, 1.85 mmol, 3.33 equiv). The reaction mixture was stirred at 80 °C for 1.5 hours to effect complete iminium formation. The crude iminium was then transferred via canula to a flame dried microwave vial containing **21** (155 mg, 0.83 mmol, 1.5 equiv). The vial was then placed into a pre-heated oil bath at 150 °C for 24 hours. After cooling to room temperature,  $\text{Ac}_2\text{O}$  (0.31 mL, 3.30 mmol, 6.0 equiv) and  $\text{NEt}_3$  (0.61 mL, 4.40 mmol, 8.0 equiv) were added and the reaction was stirred at 50 °C for 2 additional hours. The reaction was cooled to room temperature, quenched with sat. aq.  $\text{NH}_4\text{Cl}$  (10 mL) and extracted with EtOAc (20 mL  $\times$  3). The combined organic extracts were washed with brine, dried over anhydrous  $\text{Na}_2\text{SO}_4$ , filtered, and concentrated *in vacuo*. The residue was purified by flash column chromatography (1:1 hexanes:EtOAc) to yield **26** (130 mg, 53% yield, dr = 10:1) as a yellow solid.

**$^1\text{H}$  NMR (600 MHz,  $\text{CDCl}_3$ ):**  $\delta$  9.06 – 8.96 (m, 1H), 8.71 – 8.61 (m, 1H), 8.11 (ddd,  $J$  = 8.1, 2.4, 1.6 Hz, 1H), 7.39 (ddd,  $J$  = 8.1, 4.8, 0.9 Hz, 1H), 6.51 (s, 1H), 6.26 (s, 1H), 4.51 (dd,  $J$  = 11.7, 4.5 Hz, 1H), 2.25 (dt,  $J$  = 13.0, 3.2 Hz, 1H), 2.09 – 2.02 (s+m, 3H+1H), 1.94 (td,  $J$  = 13.4, 4.5 Hz, 1H), 1.87 – 1.80 (m, 2H), 1.71 (tdd,  $J$  = 12.8, 11.5, 3.2 Hz, 1H), 1.65 – 1.61 (m, 1H), 1.61 – 1.56 (m, 1H), 1.53 (d,  $J$  = 1.0 Hz, 3H), 1.19 (d,  $J$  = 0.9 Hz, 3H), 1.17 (dd,  $J$  = 12.1, 2.1 Hz, 1H), 0.92 (s, 3H), 0.90 (s, 3H).

**$^{13}\text{C}$  NMR (151 MHz,  $\text{CDCl}_3$ ):**  $\delta$  170.9, 161.9, 161.7, 157.0, 151.4, 147.1, 146.9, 133.0, 127.6, 123.8, 109.4, 102.0, 98.8, 82.2, 80.0, 51.3, 41.2, 39.2, 38.2, 36.0, 28.2, 27.2, 23.9, 23.9, 21.4, 19.0, 16.8.

**HRMS (ESI):** calcd for  $\text{C}_{27}\text{H}_{31}\text{NO}_3\text{H}^+$  ( $[\text{M}+\text{H}]$ ) 450.2275, found 450.2283.

**$[\alpha]_D^{25}$**  = +102.9 ( $c$  = 1.0,  $\text{CHCl}_3$ )

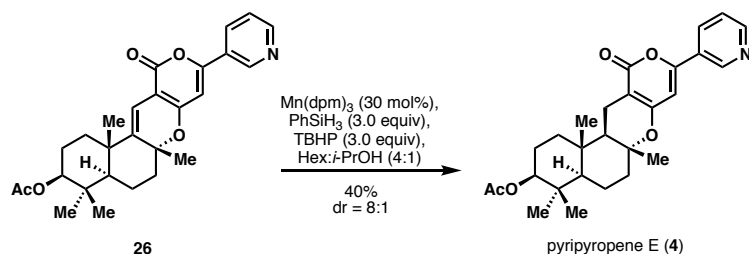

A solution of **26** (12 mg, 0.027 mmol, 1.0 equiv) in dry hexanes/*i*-PrOH (4:1, 0.4 mL hexanes, 0.1 mL *i*-PrOH) was treated with phenylsilane (10  $\mu$ L, 0.081 mmol, 3.0 equiv), and 5.5 M TBHP in decanes (14.7  $\mu$ L, 0.081 mmol, 3.0 equiv). The solution was degassed with argon via subsurface sparging for 10 minutes, then Mn(dpm)<sub>3</sub> (5 mg, 0.0081 mmol, 30 mol%) was added and the reaction was degassed for a further 30 seconds. The solution was stirred at room temperature for 1 hour, then concentrated *in vacuo* and purified by preparative thin-layer chromatography (3:2 hexanes:EtOAc) to yield pyripyropene E (**4**) (5 mg, 40% yield, dr = 8:1) as a white solid.

**<sup>1</sup>H NMR (600 MHz, CDCl<sub>3</sub>):**  $\delta$  8.99 (dd,  $J$  = 2.4, 0.9 Hz, 1H), 8.65 (dd,  $J$  = 4.8, 1.6 Hz, 1H), 8.10 (ddd,  $J$  = 8.1, 2.4, 1.6 Hz, 1H), 7.38 (ddd,  $J$  = 8.1, 4.8, 0.9 Hz, 1H), 6.42 (s, 1H), 4.51 (dd,  $J$  = 11.8, 4.7 Hz, 1H), 2.52 (dd,  $J$  = 17.1, 4.7 Hz, 1H), 2.25 (dd,  $J$  = 17.1, 12.9 Hz, 1H), 2.14 (dt,  $J$  = 12.6, 3.2 Hz, 1H), 2.06 (s, 3H), 1.85 – 1.81 (m, 1H), 1.81 – 1.78 (m, 1H), 1.77 – 1.72 (m, 1H), 1.71 – 1.67 (m, 1H), 1.67 – 1.63 (m, 1H), 1.51 (dd,  $J$  = 12.9, 4.8 Hz, 1H), 1.50 – 1.40 (m, 1H), 1.27 (s, 3H), 1.19 (td,  $J$  = 13.2, 3.9 Hz, 1H), 1.09 (dd,  $J$  = 12.2, 2.2 Hz, 1H), 0.94 (s, 3H), 0.91 (s, 3H), 0.89 (s, 3H).

**<sup>13</sup>C NMR (151 MHz, CDCl<sub>3</sub>):**  $\delta$  170.8, 164.0, 162.8, 155.6, 151.1, 146.6, 132.7, 127.6, 123.5, 100.2, 99.3, 80.8, 80.1, 55.0, 51.4, 40.2, 37.7, 37.1, 36.7, 28.0, 23.4, 21.2, 20.7, 19.2, 17.3, 16.6, 15.1.

**HRMS (ESI):** calcd for C<sub>27</sub>H<sub>33</sub>NO<sub>3</sub>H<sup>+</sup> ([M+H]) 452.2431, found 452.2431

**$[\alpha]_D^{25}$**  = +55.4 ( $c$  = 0.6, CHCl<sub>3</sub>)

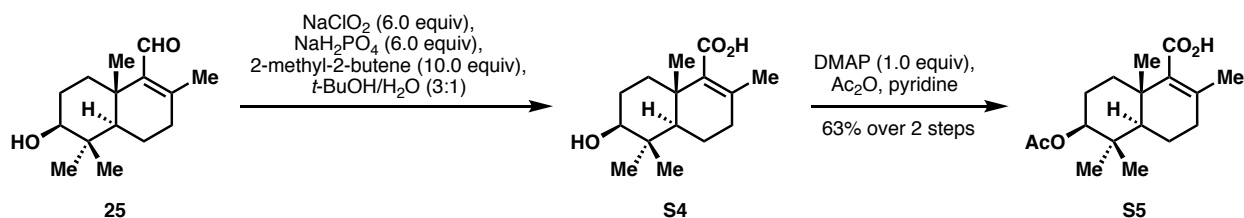

A solution of aldehyde **25** (236 mg, 1.0 mmol, 1.0 equiv) in *t*-BuOH (10 mL) and H<sub>2</sub>O (3 mL) was treated with 2-methyl-2-butene (1.12 mL, 10 mmol, 10 equiv), NaClO<sub>2</sub> (80%, 678 mg, 6 mmol, 6.0 equiv), and NaH<sub>2</sub>PO<sub>4</sub>•H<sub>2</sub>O (828 mg, 6 mmol, 6.0 equiv). The mixture was stirred for 1 hour, and the reaction was quenched by the addition of 5% aqueous sodium thiosulfate (10 mL) and extracted with

EtOAc (30 mL  $\times$  3). The combined organic layers were washed with brine, dried with Na<sub>2</sub>SO<sub>4</sub>, filtered, and concentrated *in vacuo* to give **S4** as a colorless oil that was used immediately without further purification.

A solution of **S4** in dry pyridine/Ac<sub>2</sub>O (4:1, 5 mL pyridine, 1.25 mL Ac<sub>2</sub>O) was treated with DMAP (122 mg, 1.0 mmol, 1.0 equiv) at room temperature. The solution was stirred at room temperature for 3 hours, and then concentrated *in vacuo*. The residue was purified by flash column chromatography (50:1 DCM:MeOH) to yield **S5** (186 mg, 63% yield over 2 steps) as a white foam.

**<sup>1</sup>H NMR (400 MHz, CDCl<sub>3</sub>):**  $\delta$  4.51 (dd,  $J$  = 11.6, 4.5 Hz, 1H), 2.16 – 2.10 (m, 2H), 2.06 (s, 3H), 1.83 – 1.76 (m, 1H), 1.76 – 1.72 (s+m, 3H+1H), 1.70 (dd,  $J$  = 5.1, 2.6 Hz, 1H), 1.68 – 1.63 (m, 1H), 1.63 – 1.57 (m, 1H), 1.56 – 1.45 (m, 1H), 1.25 – 1.21 (s+m, 3H+1H), 0.90 (s, 6H).

**<sup>13</sup>C NMR (101 MHz, CDCl<sub>3</sub>):**  $\delta$  174.6, 171.2, 136.7, 135.2, 80.7, 49.9, 37.9, 36.5, 34.5, 32.5, 28.2, 23.9, 21.5, 21.2, 20.6, 18.2, 16.6.

**HRMS (ESI):** calcd for C<sub>17</sub>H<sub>25</sub>O<sub>4</sub><sup>−</sup> ([M−H]) 293.1758, found 293.1762

**[ $\alpha$ ]<sub>D</sub><sup>25</sup>** = +61.6 ( $c$  = 1.0, CHCl<sub>3</sub>)

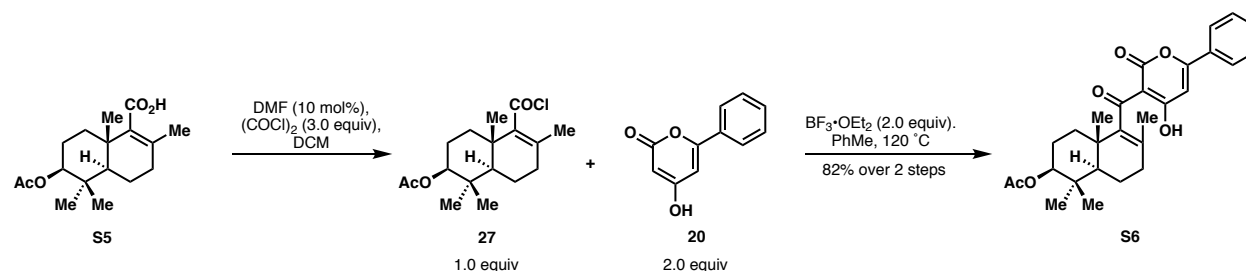

A solution of **S5** (15 mg, 0.051 mmol, 1.0 equiv) in DCM (0.5 mL) was treated with (COCl)<sub>2</sub> (13.2  $\mu$ L, 0.153 mmol, 3.0 equiv), and 0.1 M DMF in DCM (51  $\mu$ L DMF in 0.5 mL DCM, 0.0051 mmol, 10 mol%). The solution was stirred at room temperature for 2 hours, and then concentrated *in vacuo*. The crude residue was dissolved in toluene (0.5 mL), and treated with BF<sub>3</sub>•Et<sub>2</sub>O (12.6  $\mu$ L, 0.102 mmol, 2.0 equiv) and pyrone **20** (19 mg, 0.102 mmol, 2.0 equiv). The resulting solution was stirred at room temperature for 15 mins, and heated at 150°C for 12 hours. The reaction was poured into ice water (5 mL) and extracted with DCM (10 mL  $\times$  3). The combined organic extracts were washed with brine, dried over anhydrous Na<sub>2</sub>SO<sub>4</sub>, filtered, and concentrated *in vacuo*. The residue was purified by flash column chromatography (4:1 hexanes:EtOAc) to yield **S6** (19.4 mg, 82% yield over 2 steps) as a yellow oil.

**$^1\text{H}$  NMR (600 MHz,  $\text{CDCl}_3$ ):**  $\delta$  7.88 (d,  $J$  = 7.9 Hz, 2H), 7.55 (dd,  $J$  = 8.3, 5.9 Hz, 1H), 7.50 (t,  $J$  = 7.6 Hz, 2H), 6.57 (s, 1H), 4.58 (dd,  $J$  = 10.9, 4.6 Hz, 1H), 2.16 (d,  $J$  = 6.7 Hz, 2H), 2.03 (s, 3H), 1.77 (t,  $J$  = 8.7 Hz, 1H), 1.70 – 1.58 (m, 5H), 1.53 (s, 3H), 1.48 – 1.44 (m, 1H), 1.26 (s, 3H), 1.25 (s, 1H), 0.94 (s, 3H), 0.91 (s, 3H).

**$^{13}\text{C}$  NMR (151 MHz,  $\text{CDCl}_3$ ):**  $\delta$  206.0, 181.0, 170.9, 166.1, 159.5, 140.2, 132.7, 130.3, 130.0, 129.3, 126.7, 102.4, 98.4, 80.7, 48.8, 38.0, 38.0, 32.7, 31.9, 28.0, 23.7, 21.7, 21.4, 20.2, 18.5, 16.6.

**HRMS (ESI):** calcd for  $\text{C}_{28}\text{H}_{32}\text{O}_6\text{H}^+$  ( $[\text{M}+\text{H}]$ ) 465.2272, found 465.2277

$[\alpha]_{\text{D}}^{25} = +18.2$  ( $c$  = 1.0,  $\text{CHCl}_3$ )

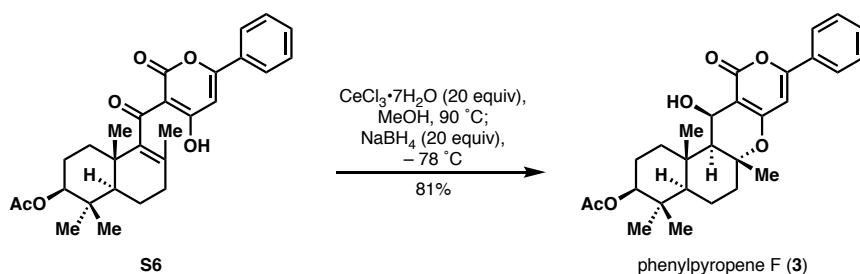

A flame dried microwave vial containing  $\text{CeCl}_3 \cdot 7\text{H}_2\text{O}$  (253 mg, 0.68 mmol, 20.0 equiv) was heated to 90 °C. A solution of **S6** (16 mg, 0.034 mmol, 1.0 equiv) in MeOH (4.0 mL) was added into the mixture at the same temperature under an argon atmosphere. After stirring at 90 °C for 3 hours, the reaction was cooled to –78 °C and treated with  $\text{NaBH}_4$  (26 mg, 0.68 mmol, 20.0 equiv). The reaction was stirred at –78 °C for 1 hour, then quenched with acetone (0.1 mL). The mixture was concentrated *in vacuo* and the crude residue was diluted with ethyl acetate (10 mL) and water (10 mL) and extracted with EtOAc (10 mL  $\times$  3). The combined organic extracts were washed with brine, dried over anhydrous  $\text{Na}_2\text{SO}_4$ , filtered, and concentrated *in vacuo*. The crude material was purified by flash column chromatography (4:1 hexanes:EtOAc) to yield phenylpyropene F (**3**) (13 mg, 81% yield) as a white solid.

**$^1\text{H}$  NMR (600 MHz, MeOD):**  $\delta$  7.86 – 7.82 (m, 2H), 7.50 – 7.45 (m, 3H), 6.62 (s, 1H), 4.94 (d,  $J$  = 3.6 Hz, 1H), 4.51 (dd,  $J$  = 11.8, 4.6 Hz, 1H), 2.16 – 2.12 (m, 1H), 2.12 – 2.09 (m, 1H), 2.03 (s, 3H), 1.85 – 1.80 (m, 1H), 1.80 – 1.77 (m, 1H), 1.77 – 1.74 (m, 1H), 1.74 – 1.71 (m, 1H), 1.69 – 1.64 (m, 1H), 1.67 (s, 3H), 1.49 (d,  $J$  = 3.6 Hz, 1H), 1.43 – 1.37 (s+m, 3H+1H), 1.12 (dd,  $J$  = 11.9, 2.1 Hz, 1H), 0.93 (s, 3H), 0.89 (s, 3H).

**$^{13}\text{C}$  NMR (151 MHz, MeOD):**  $\delta$  171.4, 164.6, 164.0, 159.6, 131.1, 130.7, 128.7, 125.2, 102.2, 98.3, 81.9, 80.6, 59.1, 55.7, 55.3, 41.5, 37.8, 37.4, 36.3, 27.2, 23.0, 21.4, 19.7, 19.2, 16.2, 15.6.

**HRMS (ESI):** calcd for  $\text{C}_{28}\text{H}_{33}\text{O}_5^+$  ( $[\text{M} - \text{H}_2\text{O} + \text{H}]$ ) 449.2323, found 449.2325

$$[\alpha]_D^{25} = +43.8 \text{ (c = 0.6, CHCl}_3\text{)}$$

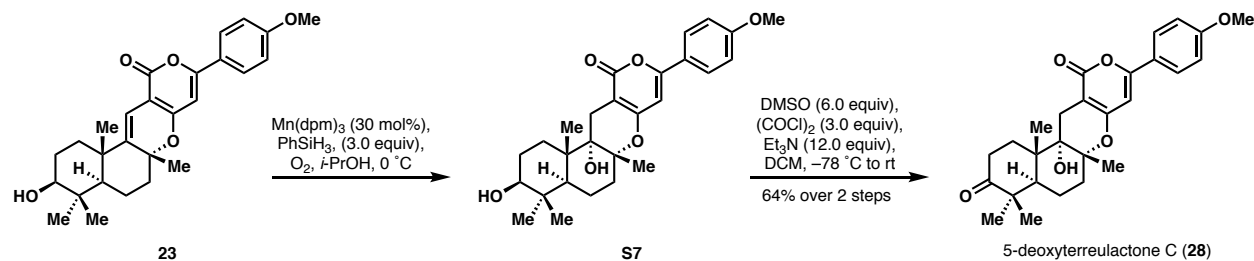

To a suspension of **23** (18 mg, 0.041 mmol, 1.0 equiv) and  $\text{Mn(dpm)}_3$  (7.5 mg, 0.012 mmol, 30 mol%) in *i*-PrOH (0.8 mL) was added  $\text{PhSiH}_3$  (15  $\mu\text{L}$ , 0.12 mmol, 3.0 equiv) at 0 °C under an oxygen atmosphere. After stirring at 0 °C for 2 hours, the mixture was slowly warmed to room temperature and stirred for 12 hours. The reaction was quenched with sat. aq.  $\text{Na}_2\text{S}_2\text{O}_3$  (1.0 mL) and diluted with EtOAc (10 mL). The layers were separated and the aqueous phase was extracted with EtOAc (10 mL  $\times$  4). The combined organic extracts were washed with brine, dried over anhydrous  $\text{Na}_2\text{SO}_4$ , filtered, and concentrated *in vacuo* to afford crude product **S7**, which was used immediately for the next step after a short column filtration.

To a solution of oxalyl chloride (10.5  $\mu\text{L}$ , 0.12 mmol, 3.0 equiv) in  $\text{CH}_2\text{Cl}_2$  (0.5 mL) was added DMSO (17.4  $\mu\text{L}$ , 0.25 mmol, 6.0 equiv) dropwise at  $-78$  °C. After stirring for 30 min, crude **S7** in  $\text{CH}_2\text{Cl}_2$  (0.5 mL) was added at  $-78$  °C. After stirring for 1 hour, the reaction was treated with  $\text{Et}_3\text{N}$  (68.0  $\mu\text{L}$ , 0.49 mmol, 12.0 equiv), and stirred for 30 minutes at ambient temperature. After that, the reaction quenched with sat. aq.  $\text{NH}_4\text{Cl}$  (5 mL) and extracted with EtOAc (10 mL  $\times$  3). The combined organic extracts were washed with brine, dried over anhydrous  $\text{Na}_2\text{SO}_4$ , filtered, and concentrated *in vacuo*. The residue was purified by flash column chromatography (1:1 hexanes:EtOAc) to yield 5-deoxyterreulactone C (**28**) (12 mg, 64% yield over 2 steps) as a white solid.

**$^1\text{H}$  NMR (600 MHz, MeOD):**  $\delta$  7.80 (d,  $J$  = 9.0 Hz, 2H), 7.03 (d,  $J$  = 9.0 Hz, 2H), 6.58 (s, 1H), 3.86 (s, 3H), 2.75 (d,  $J$  = 17.2 Hz, 1H), 2.64 (ddd,  $J$  = 15.2, 10.3, 7.2 Hz, 1H), 2.50 – 2.45 (m, 1H), 2.45 – 2.41 (m, 1H), 2.40 – 2.35 (m, 1H), 2.23 – 2.16 (m, 1H), 1.83 – 1.77 (m, 1H), 1.73 – 1.70 (m, 1H), 1.70 – 1.67 (m, 1H), 1.67 – 1.59 (m, 2H), 1.45 (d,  $J$  = 0.9 Hz, 3H), 1.22 (s, 3H), 1.11 (s, 3H), 1.08 (s, 3H).

**$^{13}\text{C}$  NMR (151 MHz, MeOD):**  $\delta$  219.5, 167.2, 166.0, 163.4, 160.0, 128.1, 125.0, 115.5, 98.2, 98.1, 83.9, 75.1, 56.0, 48.3, 46.9, 42.6, 35.0, 34.7, 32.6, 27.1, 25.6, 23.8, 21.5, 21.1, 18.2.

**HRMS (ESI):** calcd for  $\text{C}_{27}\text{H}_{32}\text{O}_6\text{H}^+$  ( $[\text{M}+\text{H}]$ ) 453.2272, found 453.2271

$$[\alpha]_D^{25} = +21.6 \text{ (c = 0.6, CHCl}_3\text{)}$$

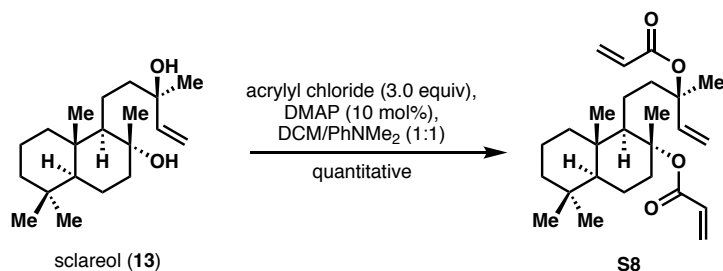

A solution of sclareol (**13**, 10.0 g, 32.4 mmol, 1.0 equiv) in DCM (12 mL) was sequentially treated with PhNMe<sub>2</sub> (12 mL), acryloyl chloride (7.86 mL, 97.2 mmol, 3.0 equiv), and DMAP (395 mg, 3.24 mmol, 10 mol%). The mixture was stirred at room temperature for 30 hours then poured to sat. aq. NaHCO<sub>3</sub> (200 mL) and extracted with DCM (100 mL  $\times$  3). The combined organic extracts were washed with brine, dried over anhydrous MgSO<sub>4</sub>, filtered, and concentrated *in vacuo*. The residue was purified by flash column chromatography (100:1 to 10:1 hexanes:EtOAc) to yield **S8** (13.5 g, quantitative yield) as pale yellow powder.

**<sup>1</sup>H NMR (600 MHz, CDCl<sub>3</sub>):**  $\delta$  6.37 – 6.19 (m, 2H), 6.11 – 5.87 (m, 3H), 5.82 – 5.63 (m, 2H), 5.21 – 5.03 (m, 2H), 2.68 (ddd,  $J$  = 12.5, 3.4, 3.4 Hz, 1H), 2.00 – 1.89 (m, 2H), 1.76 (ddd,  $J$  = 13.1, 4.4, 4.4 Hz, 1H), 1.72 – 1.64 (m, 1H), 1.62 – 1.56 (m, 5H), 1.53 (dd,  $J$  = 4.0, 4.0 Hz, 1H), 1.49 (s, 3H), 1.47 – 1.40 (m, 2H), 1.40 – 1.35 (m, 1H), 1.35 – 1.22 (m, 2H), 1.19 – 1.11 (m, 1H), 1.03 – 0.91 (m, 2H), 0.86 (s, 3H), 0.83 (s, 3H), 0.78 (s, 3H)

**<sup>13</sup>C NMR (151 MHz, CDCl<sub>3</sub>):**  $\delta$  165.7, 165.3, 142.1, 131.1, 130.3, 130.1, 129.5, 113.6, 88.8, 83.8, 59.0, 56.0, 43.2, 42.2, 39.9, 39.9, 39.1, 33.7, 33.5, 23.8, 21.8, 20.9, 20.4, 19.8, 18.7, 16.1.

**HRMS (ESI):** calcd for C<sub>26</sub>H<sub>40</sub>O<sub>4</sub>Na<sup>+</sup> ([M+Na]) 439.2819, found 439.2843.

**$[\alpha]_D^{24}$**  = –10.4 ( $c$  = 1.0, CHCl<sub>3</sub>)

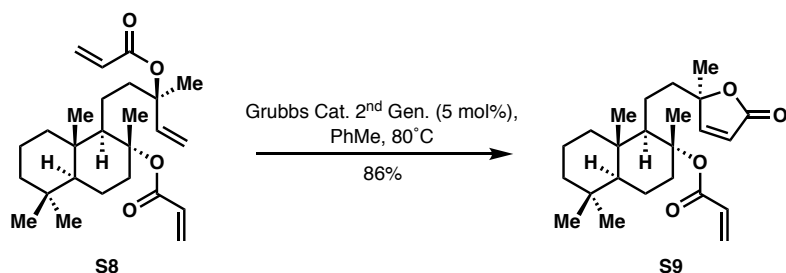

A solution of diester **S8** (5.00 g, 12.0 mmol, 1.0 equiv) in toluene (24 mL) was treated with Grubbs catalyst 2<sup>nd</sup> generation (509 mg, 0.60 mmol, 5 mol%). The reaction mixture was heated to 80 °C for 24 hours. The solvent was then evaporated *in vacuo* and the residue was purified by flash column

chromatography (10:1 to 4:1 hexanes:EtOAc) to yield lactone **S9** (4.0 g, 86% yield) as a pale yellow powder.

**$^1\text{H}$  NMR (600 MHz,  $\text{CDCl}_3$ ):**  $\delta$  7.29 (d,  $J = 5.6$  Hz, 1H), 6.25 (dd,  $J = 17.3, 1.6$  Hz, 1H), 6.02 (d,  $J = 5.6$  Hz, 1H), 5.96 (dd,  $J = 17.4, 10.3$  Hz, 1H), 5.73 (dd,  $J = 10.4, 1.6$  Hz, 1H), 2.61 – 2.56 (m, 1H), 1.93 – 1.86 (m, 1H), 1.86 – 1.78 (m, 2H), 1.70 – 1.64 (m, 1H), 1.62 – 1.52 (m, 3H), 1.47 – 1.40 (m, 7H), 1.40 – 1.35 (m, 1H), 1.34 – 1.22 (m, 3H), 1.18 – 1.10 (m, 1H), 0.99 (dd,  $J = 12.4, 2.3$  Hz, 1H), 0.96 – 0.90 (m, 1H), 0.86 (s, 3H), 0.81 (s, 3H), 0.77 (s, 3H)

**$^{13}\text{C}$  NMR (151 MHz,  $\text{CDCl}_3$ ):**  $\delta$  172.7, 165.3, 160.4, 130.7, 129.5, 120.8, 89.3, 88.7, 58.4, 55.7, 42.0, 41.2, 39.8, 39.7, 38.7, 33.4, 33.3, 24.2, 21.5, 20.9, 20.1, 19.8, 18.4, 15.8.

**HRMS (ESI):** calcd for  $\text{C}_{24}\text{H}_{36}\text{O}_4\text{H}^+$  ( $[\text{M}+\text{H}]$ ) 389.2686, found 389.2690.

$[\alpha]_{\text{D}}^{24} = -69.1$  ( $c = 1.2$ ,  $\text{CHCl}_3$ )

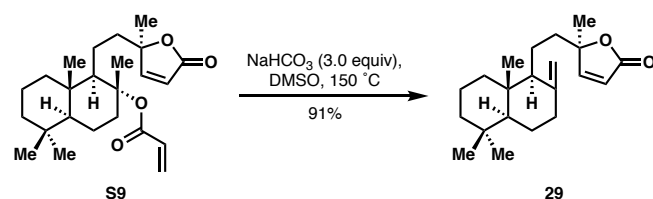

A solution of **S9** (4.01 g, 10.3 mmol, 1.0 equiv) in DMSO (50 mL) was treated with  $\text{NaHCO}_3$  (2.60 g, 30.9 mmol, 3.0 equiv). The reaction mixture was heated to 150 °C for 6 hours then cooled back down to room temperature and poured into sat. aq.  $\text{NaHCO}_3$  (200 mL) and extracted with EtOAc (100 mL  $\times$  3). The combined organic extracts were washed with brine, dried over anhydrous  $\text{MgSO}_4$ , filtered, and concentrated *in vacuo*. The residue was purified by flash column chromatography (50:1 to 15:1 hexanes:EtOAc) to olefin **29** (2.96 g, 91% yield) as a white powder.

**$^1\text{H}$  NMR (600 MHz,  $\text{CDCl}_3$ ):**  $\delta$  = 7.32 (d,  $J = 5.6$  Hz, 1H), 6.03 (d,  $J = 5.6$  Hz, 1H), 4.81 (d,  $J = 1.6$  Hz, 1H), 4.35 (d,  $J = 1.5$  Hz, 1H), 2.43 – 2.33 (m, 1H), 2.01 – 1.83 (m, 2H), 1.77 – 1.66 (m, 2H), 1.66 – 1.57 (m, 1H), 1.56 (s, 3H), 1.51 – 1.46 (m, 1H), 1.45 (s, 3H), 1.41 – 1.33 (m, 1H), 1.30 (dd,  $J = 12.9, 4.3$  Hz, 1H), 1.26 – 1.11 (m, 2H), 1.06 (dd,  $J = 12.6, 2.8$  Hz, 1H), 1.03 – 0.94 (m, 1H), 0.86 (s, 3H), 0.78 (s, 3H), 0.63 (d,  $J = 0.7$  Hz, 3H)

**$^{13}\text{C}$  NMR (151 MHz,  $\text{CDCl}_3$ ):**  $\delta$  = 172.8, 160.4, 148.7, 120.8, 106.4, 89.5, 57.0, 55.6, 42.2, 40.0, 39.2, 38.4, 37.4, 33.7, 33.7, 24.5, 24.4, 21.8, 19.4, 17.6, 14.5.

**HRMS (ESI):** calcd for  $\text{C}_{21}\text{H}_{32}\text{O}_2\text{H}^+$  ( $[\text{M}+\text{H}]$ ) 317.2475, found 317.2473.

$[\alpha]_{\text{D}}^{24} = +6.5$  ( $c = 1.0$ ,  $\text{CHCl}_3$ )

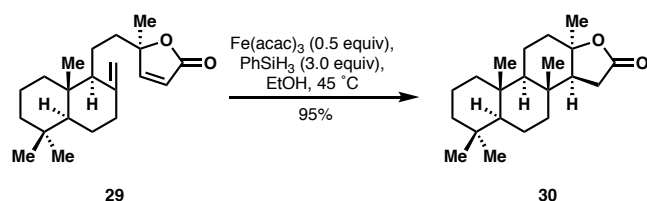

A solution of **29** (2.96 g, 9.35 mmol, 1.0 equiv) and Fe(acac)<sub>3</sub> (1.65 g, 4.68 mmol, 0.5 equiv) in ethanol (50 mL) was treated with PhSiH<sub>3</sub> (3.46 mL, 28.1 mmol, 3.0 equiv) at 45 °C. The resulting mixture was stirred at 45 °C for 5 hours. The solvent was removed *in vacuo* and the residue was purified by flash column chromatography (10:1 to 4:1 hexanes:EtOAc) to give lactone **30** (2.81 g, 95% yield) as a white powder.

**<sup>1</sup>H NMR (600 MHz, CDCl<sub>3</sub>):** δ = 2.71 (dd, *J* = 17.9, 7.9 Hz, 1 H), 2.39 (d, *J* = 17.8 Hz, 1 H), 2.33–2.25 (m, 1H), 1.77 (d, *J* = 7.9 Hz, 1 H), 1.75 – 1.70 (m, 2 H), 1.67 – 1.36 (m, 7 H), 1.36 – 1.28 (m, 1 H), 1.31 (s, 3 H), 1.17 – 1.08 (m, 1 H), 1.01 – 0.94 (m, 1 H), 0.92 (d, *J* = 0.9 Hz, 3 H), 0.87 (s, 3 H), 0.86 (s, 3 H), 0.83 – 0.77 (m, 3 H) 0.81 (s, 3 H)

**<sup>13</sup>C NMR (151 MHz, CDCl<sub>3</sub>):** δ = 177.9, 85.7, 56.8, 56.6, 55.5, 42.7, 42.2, 40.2, 37.6, 36.6, 35.2, 33.5, 33.5, 32.6, 29.9, 21.7, 18.6, 18.1, 17.4, 16.7, 15.8.

**HRMS (ESI):** calcd for C<sub>21</sub>H<sub>33</sub>O<sub>2</sub>H<sup>+</sup> ([M+H]) 319.2632, found 319.2653.

**[α]<sub>D</sub><sup>24</sup>** = +25.1 (*c* = 1.0, CHCl<sub>3</sub>)

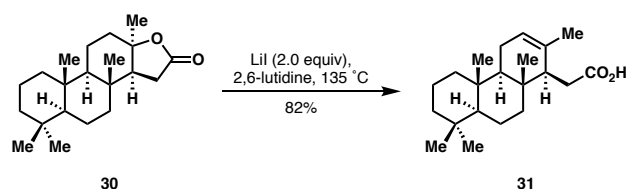

A solution of lactone **30** (1.50 g, 4.71 mmol) in 2,6-lutidine (25 mL) was treated with LiI (630 mg, 9.42 mmol, 2.0 equiv). The reaction mixture was heated to 135 °C and stirred for 10 min. The resultant mixture was passed through a short plug of Celite and washed with EtOAc (100mL). The organic solution was sequentially washed with 1M HCl (100mL), sat. aq. Na<sub>2</sub>S<sub>2</sub>O<sub>3</sub> (100mL) and brine (100 mL). The organic layer was dried over anhydrous Na<sub>2</sub>SO<sub>4</sub>, filtered, and concentrated *in vacuo*. The residue was purified via to flash column chromatography (6:1 to 2:1 hexanes:EtOAc) to give acid **31** (1.23 g, 82% yield) as a white powder.

**$^1\text{H}$  NMR (600 MHz,  $\text{CDCl}_3$ ):**  $\delta$  = 5.41 (s, 1 H), 2.54 – 2.40 (m, 2 H), 2.21 (dd,  $J$  = 17.0, 9.9 Hz, 1 H), 1.99 – 1.76 (m, 3 H), 1.65 – 1.50 (m, 7 H), 1.45 – 1.31 (m, 3 H), 1.31 – 1.05 (m, 3 H), 0.88 (s, 3 H), 0.85 (s, 3 H), 0.84 – 0.78 (m, 5 H), 0.73 (s, 3 H)

**$^{13}\text{C}$  NMR (151 MHz,  $\text{CDCl}_3$ ):**  $\delta$  = 180.7, 133.4, 122.9, 56.2, 54.8, 51.1, 42.0, 40.8, 40.0, 37.3, 36.1, 33.5, 33.3, 32.3, 22.9, 21.8, 21.4, 18.9, 18.7, 15.7, 15.0.

**HRMS (ESI):** calcd for  $\text{C}_{21}\text{H}_{33}\text{O}_2^-$  ( $[\text{M}-\text{H}]$ ) 317.2486, found 317.2480.

$[\alpha]_{\text{D}}^{24} = -40.8$  ( $c$  = 1.0 in  $\text{CHCl}_3$ )

### Screening of enzyme variants for hydroxylation of **31**

The following P450<sub>BM3</sub> variants were tested for hydroxylation of **31**: BM3 MERO1, BM3 MERO1 M177A, BM3 MERO1 I263A, and BM3 MERO1 L75A. Clarified lysates containing the desired enzyme variants were prepared from 50 mL expression cultures according to the procedure described on page S6 and small-scale enzymatic hydroxylation reactions of **31** were performed according to the procedure described on page S7. Percentage conversion of the reaction was calculated based on  $^1\text{H}$  NMR analysis of product:starting material ratio.

| P450 <sub>BM3</sub> variant | Conversion (%) |
|-----------------------------|----------------|
| BM3 MERO1                   | 33             |
| BM3 MERO1 M177A             | 35             |
| BM3 MERO1 I263A             | 28             |
| BM3 MERO1 L75A              | 65             |

  

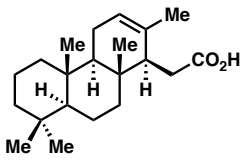

**31**

BM3 MERO1 L75A, Opt13  
NaNADP•4H<sub>2</sub>O (20 mol%),  
Na<sub>2</sub>HPO<sub>3</sub>•5H<sub>2</sub>O (20.0 equiv),  
20 °C, 150 rpm

62%

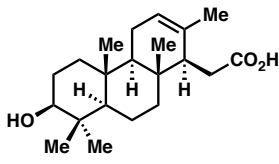

**32**

Two 2 L Erlenmeyer flasks were each charged with 400 mL clarified lysate of *E. coli* expressing BM3 MERO1 L75A and Opt13. A solution of **31** (500 mg, 2.40 mmol, 1.0 equiv) in 20 mL DMSO was added to the lysate, which became immediately cloudy. Each flask was then charged with NADP•4H<sub>2</sub>O (406 mg, 0.48 mmol, 0.20 equiv) and Na<sub>2</sub>HPO<sub>3</sub>•5H<sub>2</sub>O (10.36 g, 48.0 mmol, 20.0 equiv). The flasks were shaken at 150 rpm at 20 °C for 20 hours, then quenched with 1M HCl (40 mL per flask), and centrifuged (4 °C, 15 min, 4200 rpm). The supernatant was extracted with EtOAc (400 mL × 3) and the combined extracts were washed with brine, dried over anhydrous Na<sub>2</sub>SO<sub>4</sub>, and concentrated. The crude material was

purified by flash column chromatography (1:1 hexanes:EtOAc) to yield **32** (660 mg, 62% yield) as a white solid.

**$^1\text{H}$  NMR (400 MHz,  $\text{CDCl}_3$ ):**  $\delta$  = 5.48 – 5.34 (m, 1H), 3.33 (dd,  $J$  = 10.7, 4.7 Hz, 1H), 2.67 – 2.55 (m, 1H), 2.53 – 2.39 (m, 2H), 2.22 (ddd,  $J$  = 16.9, 9.6, 1.3 Hz, 1H), 2.10 – 1.97 (m, 1H), 1.83 (dd,  $J$  = 12.8, 3.4 Hz, 1H), 1.65 – 1.52 (m, 6H), 1.50 – 1.40 (m, 2H), 1.40 – 1.32 (m, 1H), 1.31 – 1.24 (m, 3H), 1.19 (dd,  $J$  = 13.1, 4.3 Hz, 1 H), 0.95 (s, 3H), 0.91 – 0.83 (m, 4H), 0.81 (s, 3H), 0.75 (s, 3H)

**$^{13}\text{C}$  NMR (101 MHz,  $\text{CDCl}_3$ ):**  $\delta$  = 179.6, 132.4, 123.6, 80.9, 55.4, 54.9, 51.0, 43.3, 40.7, 39.9, 36.6, 33.1, 33.0, 32.1, 29.9, 26.4, 21.4, 21.2, 19.0, 15.2, 11.4.

**HRMS (ESI):** calcd for  $\text{C}_{21}\text{H}_{33}\text{O}_3^-$  ( $[\text{M}-\text{H}]$ ) 333.2435, found 333.2431.

$[\alpha]_D^{24} = -35.0$  ( $c = 0.3$ ,  $\text{CHCl}_3$ )

### *Substrate binding and kinetic data for hydroxylation of sclareolide and acid 31*

| Enzyme         | Substrate   | NADPH ( $\text{min}^{-1}$ ) | Product ( $\text{min}^{-1}$ ) | $K_d$ ( $\mu\text{M}$ ) |
|----------------|-------------|-----------------------------|-------------------------------|-------------------------|
| BM3 MERO1      | Sclareolide | $1608 \pm 308$              | $328 \pm 46$                  | $7.6 \pm 0.7$           |
| BM3 MERO1 L75A | <b>31</b>   | $141 \pm 7$                 | $24.7 \pm 0.7$                | $11.4 \pm 0.8$          |

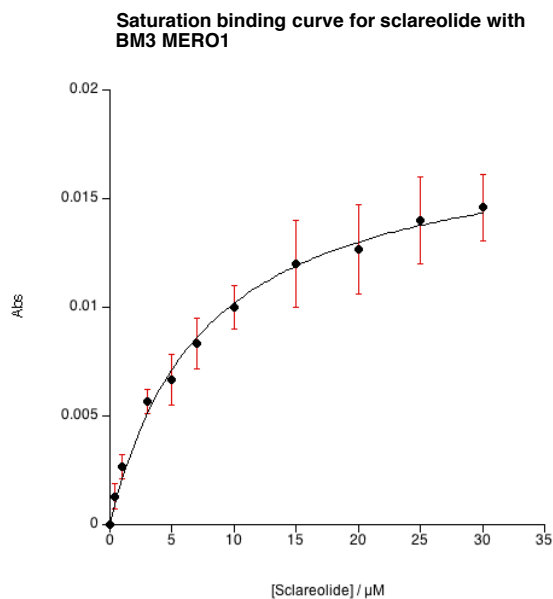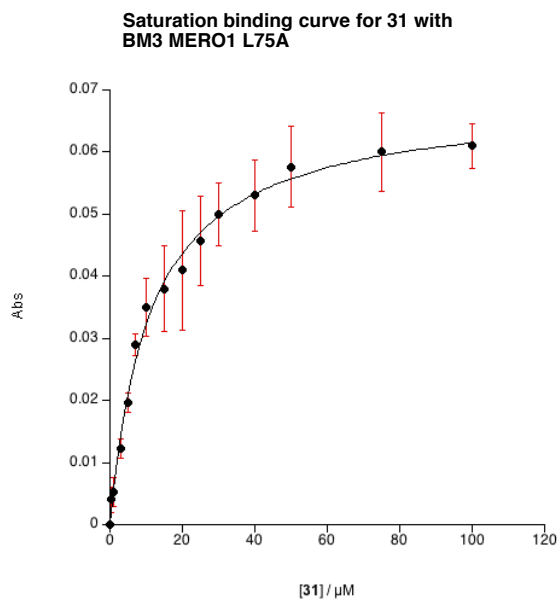

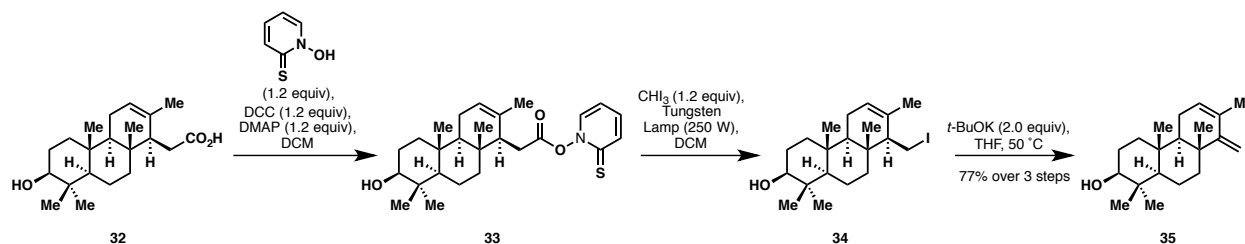

A solution of acid **32** (153 mg, 0.457 mmol, 1.0 equiv) in DCM (5 mL) was sequentially treated with pyridine-2-thione (70.0 mg, 0.548 mmol, 1.2 equiv), DCC (113 mg, 0.548 mmol, 1.2 equiv) and DMAP (61.5 mg, 0.548 mmol, 1.2 equiv). The reaction mixture was stirred at room temperature for 30 min then the reaction was quenched with sat. aq.  $\text{NaHCO}_3$  solution (5 mL) and extracted with DCM (5 mL  $\times$  3). The combined organic extracts were washed with 1M HCl (10 mL), dried over anhydrous  $\text{MgSO}_4$ , filtered, and concentrated *in vacuo* to give crude **33**. The residue was then dissolved into DCM (5 mL) and iodoform (216 mg, 0.548 mmol, 1.2 equiv) was added to the solution. The reaction mixture was irradiated with tungsten lamp (250 W) for 2 hours in a water bath, keeping the internal temperature under 45 °C. The reaction mixture was passed through a short pad of silica gel and washed with hexanes:EtOAc (4:1) to give iodide **34** (146 mg, 77% yield over 2 steps) as a pale yellow powder. Compound **34** was used immediately without further purification.

A solution of **34** (135 mg, 0.324 mmol, 1.0 equiv) in THF (12 mL) was treated with *t*-BuOK (70.5 mg, 0.648 mmol, 2.0 equiv). The reaction mixture was heated to 50 °C for 10 min, then poured to sat. aq.  $\text{NaHCO}_3$  (20 mL) and extracted with EtOAc (10 mL  $\times$  3). The combined organic extracts were washed with brine, dried over anhydrous  $\text{MgSO}_4$ , filtered, and concentrated *in vacuo*. The residue was purified by flash column chromatography (8:1 hexanes:EtOAc) to give diene **35** (74.0 mg, quantitative yield, 77% yield over 3 steps) as a white powder.

**$^1\text{H}$  NMR (400 MHz,  $\text{CDCl}_3$ ):**  $\delta$  = 5.60 – 5.52 (m, 1H), 4.75 (s, 1H), 4.72 (s, 1H), 3.11 (dd,  $J$  = 11.1, 5.1 Hz, 1H), 2.01 – 1.95 (m, 2H), 1.95 – 1.88 (m, 1H), 1.73 – 1.69 (m, 3H), 1.64 – 1.33 (m, 6H), 1.13 (dd,  $J$  = 8.3, 8.3 Hz, 1H), 0.94 – 0.90 (m, 4H), 0.88 (s, 3H), 0.86 (s, 3H), 0.76 – 0.66 (m, 4H)

**$^{13}\text{C}$  NMR (101 MHz,  $\text{CDCl}_3$ ):**  $\delta$  = 158.3, 131.1, 126.4, 104.2, 79.0, 55.3, 53.4, 39.5, 38.9, 38.2, 37.9, 37.4, 28.2, 27.3, 23.3, 22.5, 20.6, 18.8, 16.2, 15.7.

**HRMS (ESI):** calcd for  $\text{C}_{20}\text{H}_{32}\text{OH}^+$  ( $[\text{M}+\text{H}]$ ) 289.2526, found 289.2520.

**$[\alpha]_D^{24}$**  = –10.9 ( $c$  = 1.0,  $\text{CHCl}_3$ )

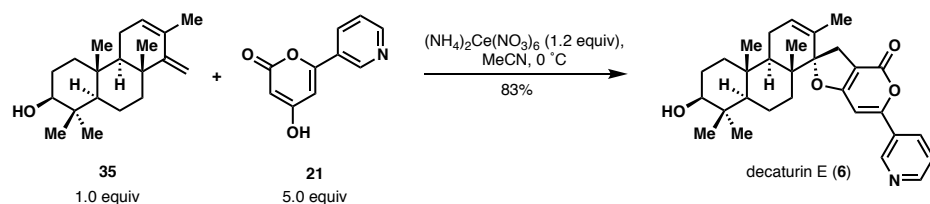

A solution of diene **35** (13.5 mg, 0.0324 mmol, 1.0 equiv) and pyrone **21** (30.6 mg, 0.162 mmol, 5.0 equiv) in MeCN (2 mL) was treated with  $(\text{NH}_4)_2\text{Ce}(\text{NO}_3)_6$  (22.7 mg, 0.0389 mmol, 1.2 equiv) at 0 °C. The reaction mixture was stirred at 0 °C for 30 min then quenched with sat. aq.  $\text{Na}_2\text{S}_2\text{O}_3$  solution (5 mL) and extracted with EtOAc (10 mL  $\times$  3). The combined organic extracts were washed with brine, dried over anhydrous  $\text{MgSO}_4$ , filtered, and concentrated *in vacuo*. The residue was purified by flash column chromatography (2:1 to 1:2 hexanes:EtOAc) to give decaturin E (**6**) (12.8 mg, 83% yield) as a yellow powder.

**$^1\text{H}$  NMR (600 MHz, DMSO- $d_6$ ):**  $\delta$  = 9.07 (dd,  $J$  = 2.4, 0.9 Hz, 1H), 8.67 (dd,  $J$  = 4.8, 1.6 Hz, 1H), 8.23 (ddd,  $J$  = 8.1, 2.4, 1.6 Hz, 1H), 7.54 (ddd,  $J$  = 8.1, 4.8, 0.9 Hz, 1H), 7.34 (s, 1H), 5.66 (br. s, 1H), 4.34 (d,  $J$  = 5.2 Hz, 1H), 3.01 (d,  $J$  = 16.1 Hz, 1H), 2.98 (dd,  $J$  = 7.5, 3.7 Hz, 1H), 2.86 (d,  $J$  = 16.1 Hz, 1H), 2.00 – 1.94 (m, 2H), 1.62 (s, 3H), 1.59 (m, 1H), 1.58 – 1.56 (m, 1H), 1.56 (m, 1H), 1.54 – 1.49 (m, 1H), 1.49 – 1.42 (m, 2H), 1.42 – 1.37 (m, 1H), 1.31 (td,  $J$  = 12.7, 4.1 Hz, 1H), 0.93 – 0.90 (m, 1H), 0.89 (s, 3H), 0.88 (s, 3H), 0.87 (s, 3H), 0.70 (m, 1H), 0.68 (s, 3H).

**$^{13}\text{C}$  NMR (151 MHz, DMSO- $d_6$ ):**  $\delta$  = 170.0, 159.6, 159.5, 151.4, 146.7, 133.1, 130.9, 128.2, 127.2, 124.0, 101.2, 100.1, 94.2, 76.8, 54.5, 47.4, 40.4, 38.4, 37.9, 36.4, 31.7, 28.2, 27.8, 26.9, 22.5, 18.1, 17.5, 16.0, 16.0, 15.4.

**HRMS (ESI):** calcd for  $\text{C}_{30}\text{H}_{37}\text{NO}_4\text{H}^+$  ( $[\text{M}+\text{H}]$ ) 476.2975, found 476.2812.

**$[\alpha]_D^{24}$**  = +80.1 ( $c$  = 0.5, MeOH)

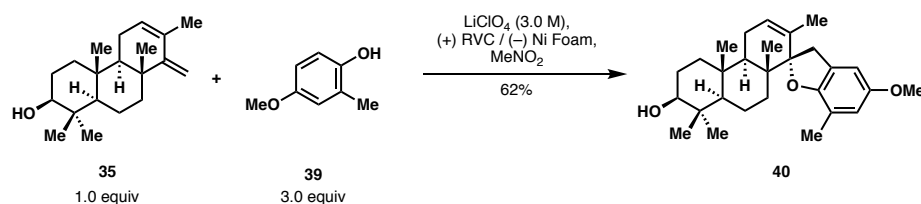

In an Electrasyn 2.0 reaction cell, a solution of diene **35** (20.1 mg, 0.0694 mmol, 1.0 equiv) and phenol **39** (28.2 mg, 0.208 mmol, 3.0 equiv) in  $\text{MeNO}_2$  (2 mL) was treated with  $\text{LiClO}_4$  (638 mg, 6.0 mmol, 3.0 M). The reaction cell was capped with a septum equipped with an RVC anode and Ni-foam cathode. The reaction mixture was stirred and under a constant potential of 2.10 V for 30 min then quenched with



**<sup>1</sup>H NMR (400 MHz, CD<sub>3</sub>OD):**  $\delta$  6.34 – 6.31 (m, 1H), 6.29 (dt,  $J$  = 2.7, 0.8 Hz, 1H), 3.18 (d,  $J$  = 16.7 Hz, 1H), 3.12 (dd,  $J$  = 11.5, 4.9 Hz, 1H), 2.72 (d,  $J$  = 16.5 Hz, 1H), 2.08 (d,  $J$  = 0.7 Hz, 3H), 1.75 – 1.72 (m, 1H), 1.71 – 1.67 (m, 1H), 1.63 – 1.60 (m, 1H), 1.59 – 1.58 (m, 1H), 1.56 – 1.54 (m, 2H), 1.55 – 1.53 (m, 1H), 1.51 – 1.50 (m, 1H), 1.49 – 1.47 (m, 1H), 1.47 – 1.45 (m, 1H), 1.45 – 1.42 (m, 1H), 1.42 – 1.37 (m, 1H), 1.35 (dd,  $J$  = 13.2, 4.4 Hz, 1H), 1.04 – 0.97 (m, 1H), 0.95 (d,  $J$  = 0.7 Hz, 3H), 0.90 (s, 3H), 0.86 (m, 3H), 0.73 (s, 3H), 0.72 (d,  $J$  = 3.3 Hz, 1H), 0.62 (d,  $J$  = 6.5 Hz, 3H).

**<sup>13</sup>C NMR (101 MHz, CD<sub>3</sub>OD):**  $\delta$  154.3, 151.2, 128.1, 119.1, 116.1, 109.5, 95.6, 79.7, 56.6, 52.8, 43.6, 39.9, 39.8, 38.3, 38.2, 36.1, 34.0, 32.4, 28.6, 28.1, 21.5, 18.9, 17.6, 16.9, 16.1, 16.0, 15.6.

**HRMS (ESI):** calcd for C<sub>27</sub>H<sub>40</sub>O<sub>3</sub>H<sup>+</sup> ([M+H]) 413.3050, found 413.3041

$[\alpha]_D^{24} = -11.2$  ( $c$  = 0.20, CHCl<sub>3</sub>)

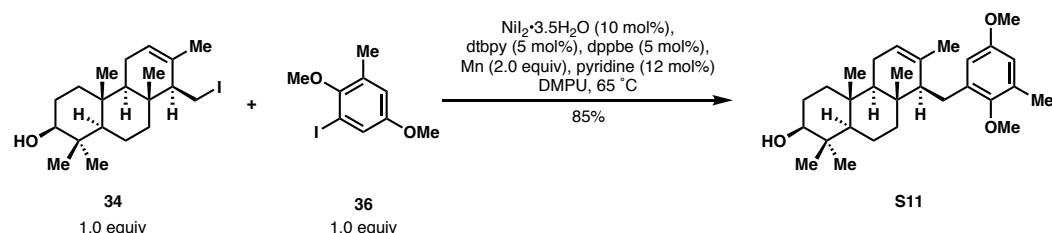

A solution of iodide **34** (41.6 mg, 0.10 mmol, 1.0 equiv) and **36** (27.8 mg, 0.10 mmol, 1.0 equiv) in DMPU (0.4 mL) was treated with NiI<sub>2</sub>·3.5H<sub>2</sub>O (4.0 mg, 0.01 mmol, 10 mol%), 1,2-bis(diphenylphosphino)benzene (2.23 mg, 0.005 mmol, 5 mol%), 4,4'-di-tert-butyl-2,2'-dipyridyl (1.3 mg, 0.05 mmol, 5 mol%), manganese powder (11.0 mg, 0.20 mmol, 2.0 equiv), and pyridine (1  $\mu$ L, 0.012 mmol, 12 mol%). The reaction mixture was heated to 65 °C for 8 hours then quenched with saturated aq. Na<sub>2</sub>S<sub>2</sub>O<sub>3</sub> solution (5 mL) and extracted with EtOAc (10 mL  $\times$  3). The combined organic extracts were washed with brine, dried over anhydrous MgSO<sub>4</sub>, filtered, and concentrated *in vacuo*. The residue was purified by flash column chromatography (4:1 to 2:1 hexanes:EtOAc) to yield **S11** (37.4 mg, 85% yield) as a white powder.

**<sup>1</sup>H NMR (400 MHz, CDCl<sub>3</sub>):**  $\delta$  6.65 (d,  $J$  = 3.2 Hz, 1H), 6.53 (d,  $J$  = 3.1 Hz, 1H), 5.33 (s, 1H), 3.76 (s, 3H), 3.66 (s, 3H), 3.22 (dd,  $J$  = 11.1, 5.0 Hz, 1H), 2.72 – 2.57 (m, 2H), 2.34 (d,  $J$  = 8.4 Hz, 1H), 2.27 (s, 3H), 2.01 (dt,  $J$  = 12.9, 3.3 Hz, 1H), 1.95 – 1.87 (m, 2H), 1.73 – 1.54 (m, 4H), 1.45 – 1.39 (m, 3H), 1.27 – 1.16 (m, 3H), 0.99 (s+m, 3H+1H), 0.91 (d,  $J$  = 0.8 Hz, 3H), 0.88 (s, 3H), 0.86 – 0.81 (m, 1H), 0.80 (s, 3H).

**<sup>13</sup>C NMR (101 MHz, CDCl<sub>3</sub>):**  $\delta$  155.4, 150.6, 137.7, 135.7, 131.8, 121.8, 112.8, 79.1, 77.4, 60.5, 55.6, 55.3, 55.3, 55.1, 41.3, 38.9, 38.5, 37.2, 36.9, 28.3, 27.4, 26.5, 22.9, 22.4, 18.8, 16.7, 15.9, 15.7, 14.9.

**HRMS (ESI):** calcd for C<sub>29</sub>H<sub>44</sub>O<sub>3</sub>H<sup>+</sup> ([M+H]) 441.3363, found 441.3353.

$$[\alpha]_D^{24} = -79.3 \text{ (c = 1.0, CHCl}_3\text{)}$$

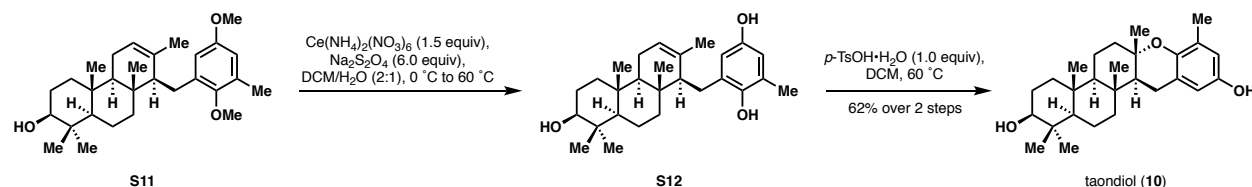

A solution of **S11** (37.4 mg, 0.0850 mmol, 1.0 equiv) in DCM/H<sub>2</sub>O (2:1, 1.0 mL DCM, 0.5 mL H<sub>2</sub>O) was treated with Ce(NH<sub>4</sub>)<sub>2</sub>(NO<sub>3</sub>)<sub>6</sub> (70.0 mg, 0.128 mmol, 1.5 equiv) at 0 °C. The reaction mixture was stirred at 0 °C for 1 hour and then treated with Na<sub>2</sub>S<sub>2</sub>O<sub>4</sub> (89.1 mg, 0.510 mmol, 6.0 equiv). The reaction mixture was heated to 60 °C for 1 hour then quenched with saturated aq. NaHCO<sub>3</sub> solution (5 mL) and extracted with EtOAc (10 mL × 3). The combined organic extracts were washed with brine, dried over anhydrous MgSO<sub>4</sub>, filtered, and concentrated *in vacuo*. Crude **S12** was dissolved in DCM (1.0 mL) and *p*-toluenesulfonic acid monohydrate (16.5 mg, 0.0850 mmol, 1.0 equiv) was added to the solution. The reaction mixture was heated to 60 °C for 30 min then quenched with saturated aq. NaHCO<sub>3</sub> solution (5 mL) and extracted with EtOAc (5 mL × 3). The combined organic extracts were washed with brine, dried over anhydrous MgSO<sub>4</sub>, filtered, and concentrated *in vacuo*. The residue was purified by flash column chromatography (2:1 to 1:1 hexanes:EtOAc) to yield taondiol (**10**) (21.8 mg, 62% yield over 2 steps) as a white powder.

**<sup>1</sup>H NMR (600 MHz, CDCl<sub>3</sub>):** δ 6.45 (d, *J* = 3.0 Hz, 1H), 6.38 (d, *J* = 3.0 Hz, 1H), 3.22 (dd, *J* = 11.6, 4.7 Hz, 1H), 2.55 (d, *J* = 8.4 Hz, 1H), 2.54 (s, 1H), 2.12 – 2.06 (m, 3H), 2.05 – 2.00 (m, 1H), 1.79 (dt, *J* = 13.2, 3.6 Hz, 1H), 1.75 (dt, *J* = 13.0, 3.7 Hz, 1H), 1.73 – 1.70 (m, 1H), 1.70 – 1.67 (m, 2H), 1.65 – 1.61 (m, 1H), 1.60 – 1.59 (m, 1H), 1.58 – 1.56 (m, 1H), 1.50 – 1.42 (m, 1H), 1.40 – 1.36 (m, 1H), 1.13 (s, 3H), 1.06 – 1.02 (m, 1H), 1.02 – 1.00 (m, 1H), 0.98 (s, 3H), 0.95 (dd, *J* = 11.9, 2.0 Hz, 1H), 0.87 (s, 3H), 0.85 (s, 3H), 0.78 (s+m, 3H+1H).

**<sup>13</sup>C NMR (101 MHz, CDCl<sub>3</sub>):** δ 147.9, 145.5, 127.3, 122.5, 115.5, 113.1, 79.0, 76.2, 60.7, 55.5, 52.6, 41.2, 41.1, 39.0, 38.5, 37.3, 37.0, 28.1, 27.5, 22.8, 21.0, 18.9, 18.1, 16.6, 16.3, 16.0, 15.4.

**HRMS (ESI):** calcd for C<sub>27</sub>H<sub>40</sub>O<sub>3</sub>H<sup>+</sup> ([M+H]) 413.3050, found 413.3040.

$$[\alpha]_D^{24} = -46.9 \text{ (c = 0.35, CHCl}_3\text{)}$$

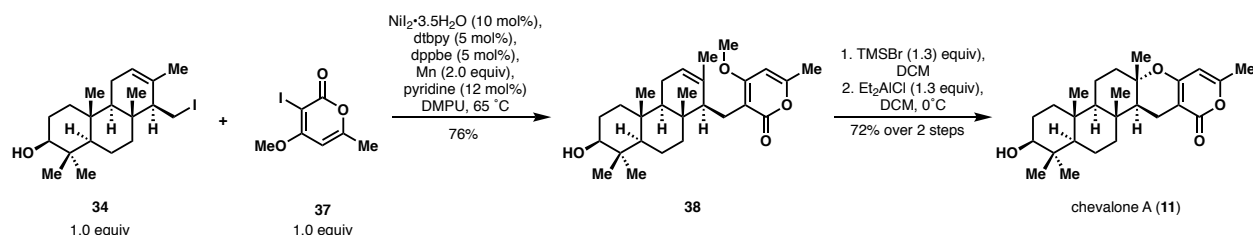

A solution of iodide **34** (41.6 mg, 0.10 mmol) and pyrone **37** (26.6 mg, 0.10 mmol, 1.0 equiv) in DMPU (0.4 mL) was treated with  $\text{NiI}_2 \cdot 3.5\text{H}_2\text{O}$  (4.0 mg, 0.01 mmol, 10 mol%), 1,2-bis(diphenylphosphino)benzene (2.23 mg, 0.005 mmol, 5 mol%), 4,4'-di-tert-butyl-2,2'-dipyridyl (1.3 mg, 0.05 mmol, 5 mol%), manganese powder (11.0 mg, 0.20 mmol, 2.0 equiv), and pyridine (1  $\mu\text{L}$ , 0.012 mmol, 12 mol%). The reaction mixture was heated to 65 °C for 8 hours then quenched with saturated aq.  $\text{Na}_2\text{S}_2\text{O}_3$  solution (5 mL) and extracted with EtOAc (10 mL  $\times$  3). The combined organic extracts were washed with brine, dried over anhydrous  $\text{MgSO}_4$ , filtered, and concentrated *in vacuo*. The residue was purified by flash column chromatography (4:1 to 2:1 hexanes:EtOAc) to yield **38** (31.5 mg, 76% yield) as a white powder which was used immediately.

A stirred solution of **38** (31.5 mg, 0.076 mmol, 1.0 equiv) in DCM (1.0 mL) was treated with TMSBr (15.3 mg, 0.10 mmol, 1.3 equiv) at room temperature. The reaction was stirred for 8 hours then quenched with sat. aq.  $\text{NaHCO}_3$  solution (5 mL) and extracted with EtOAc (10 mL  $\times$  3). The combined organic extracts were washed with brine (10 mL), dried over anhydrous  $\text{MgSO}_4$ , filtered, and concentrated *in vacuo*. The crude residue was dissolved in DCM (1.0 mL), cooled to 0 °C, and treated with 1.0 M  $\text{Et}_2\text{AlCl}$  in toluene (0.100 mL, 0.10 mmol, 1.3 equiv). The reaction mixture was stirred at 0 °C for 2 hours then quenched with sat. aq.  $\text{NaHCO}_3$  (5 mL) and extracted with EtOAc (5 mL  $\times$  3). The combined organic extracts were washed with brine, dried over anhydrous  $\text{MgSO}_4$ , filtered, and concentrated *in vacuo*. The residue was purified by flash column chromatography (2:1 to 1:1 hexanes:EtOAc) to yield chevalone A (**11**) (22.6 mg, 72% yield over 2 steps) as a white powder.

**$^1\text{H}$  NMR (400 MHz,  $\text{CDCl}_3$ ):**  $\delta$  5.68 (d,  $J$  = 1.1 Hz, 1H), 3.19 (dd,  $J$  = 11.4, 4.9 Hz, 1H), 2.42 (dd,  $J$  = 16.8, 4.9 Hz, 1H), 2.17 (s, 3H), 2.13 – 2.08 (m, 1H), 2.04 (dt,  $J$  = 12.5, 3.2 Hz, 1H), 1.84 (dt,  $J$  = 12.8, 3.3 Hz, 1H), 1.76 – 1.71 (m, 1H), 1.70 – 1.67 (m, 1H), 1.66 – 1.62 (m, 1H), 1.62 – 1.59 (m, 1H), 1.59 – 1.58 (m, 1H), 1.58 – 1.55 (m, 1H), 1.46 (dd,  $J$  = 7.4, 4.2 Hz, 1H), 1.43 – 1.37 (m, 1H), 1.37 – 1.30 (m, 1H), 1.19 (d,  $J$  = 0.9 Hz, 3H), 1.02 (dd,  $J$  = 12.7, 4.2 Hz, 1H), 0.96 (s, 3H), 0.94 – 0.91 (m, 1H), 0.87 (d,  $J$  = 0.8 Hz, 3H), 0.86 – 0.81 (s+m, 3H+1H), 0.79 – 0.74 (s+m, 3H+1).

**$^{13}\text{C}$  NMR (101 MHz,  $\text{CDCl}_3$ ):**  $\delta$  165.5, 163.4, 159.9, 100.8, 98.0, 80.7, 78.9, 60.5, 55.5, 52.1, 41.1, 40.4, 39.0, 38.5, 37.4, 37.3, 28.1, 27.4, 20.7, 19.9, 18.8, 18.1, 17.0, 16.5, 16.2, 15.4.

**HRMS (ESI):** calcd for  $C_{26}H_{38}O_4H^+$  ( $[M+H]$ ) 415.2843, found 415.2850.

$[\alpha]_D^{24} = -98.3$  ( $c = 1.0$ ,  $CHCl_3$ )

**Table 1. Comparison table of this work and previous syntheses of 1, 2, 3, 4, 6, 8, 10, 11.**

| Compound                      | Previous synthesis                                                                                                                                                                                                                                         | This work                                 |
|-------------------------------|------------------------------------------------------------------------------------------------------------------------------------------------------------------------------------------------------------------------------------------------------------|-------------------------------------------|
| Arisugacin F ( <b>1</b> )     | 7 steps, 4.8% overall yield, racemic (Ōmura, 2003) <sup>56</sup><br>Note: stoichiometric $Hg^{2+}$ used                                                                                                                                                    | 7 steps, 18.1% overall yield, asymmetric  |
| Phenylpyropene C ( <b>2</b> ) | None                                                                                                                                                                                                                                                       | 7 steps, 21.8% overall yield, asymmetric  |
| Phenylpyropene F ( <b>3</b> ) | None                                                                                                                                                                                                                                                       | 11 steps, 8.8% overall yield, asymmetric  |
| Pyripyropene E ( <b>4</b> )   | 9 steps, 7.1% overall yield, asymmetric (Smith, 1996) <sup>12</sup><br>Note: lack of selectivity in asymmetric dihydroxylation                                                                                                                             | 8 steps, 4.5% overall yield, asymmetric   |
| Decaturin E ( <b>6</b> )      | None                                                                                                                                                                                                                                                       | 10 steps, 24.0% overall yield, asymmetric |
| Stypodiol ( <b>8</b> )        | 13 steps, 5.8% overall yield, asymmetric (Abad, 1998) <sup>15</sup><br>Note: lack of selectivity at C14 stereocenter<br>16 steps, 0.66% overall yield, asymmetric (Falck, 1993) <sup>42</sup><br>29 steps, 0.13% overall yield, (Mori, 1995) <sup>57</sup> | 12 steps, 10.4% overall yield, asymmetric |
| Taondiol ( <b>10</b> )        | 14 steps (from methyl Wieland Miescher ketone), 3.1% overall yield, asymmetric (Dethe, 2018) <sup>58</sup>                                                                                                                                                 | 11 steps, 15.4% overall yield, asymmetric |
| Chevalone A ( <b>11</b> )     | None                                                                                                                                                                                                                                                       | 11 steps, 15.8% overall yield, asymmetric |

### NMR Comparisons:

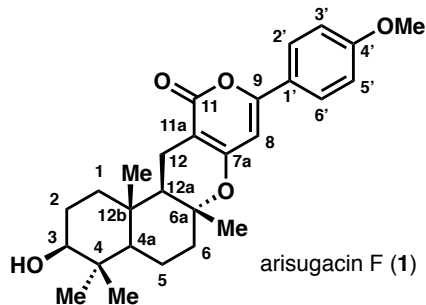

**Table 2: NMR Chemical Shift Comparison of Synthetic and Natural<sup>59</sup> Arisugacin F**

| Pos.           | Natural<br>$\delta_H$ [ppm, mult $J$ (Hz)]<br>400 MHz | Synthetic<br>$\delta_H$ [ppm, mult, $J$ (Hz)]<br>600 MHz | Natural<br>$\delta_C$ [ppm]<br>101 MHz | Synthetic<br>$\delta_C$ [ppm]<br>151 MHz |
|----------------|-------------------------------------------------------|----------------------------------------------------------|----------------------------------------|------------------------------------------|
| 1              | 1.11, ddd (4.0, 13.0, 13.0)<br>1.81, m                | 1.12, td (4.0, 13.2)<br>1.81 – 1.78, m                   | 37.5                                   | 37.4                                     |
| 2              | 1.70, m<br>1.62, m                                    | 1.73 – 1.70, m<br>1.65 – 1.61, m                         | 27.2                                   | 27.2                                     |
| 3              | 3.24, dd (4.8, 11.6)                                  | 3.25, dd (4.7, 11.6)                                     | 78.5                                   | 78.5                                     |
| 4              |                                                       |                                                          | 38.8                                   | 38.8                                     |
| 4a             | 1.00, dd (2.0, 12.1)                                  | 0.99, dd (2.3, 12.2)                                     | 55.0                                   | 55.0                                     |
| 4 $\alpha$ -Me | 1.03, s                                               | 1.03, s                                                  | 28.1                                   | 28.1                                     |
| 4 $\beta$ -Me  | 0.81, s                                               | 0.82, s                                                  | 15.5                                   | 15.5                                     |
| 5              | 1.81, m<br>1.44 dddd (3.0, 12.1, 13.5, 13.5)          | 1.84 – 1.81, m<br>1.46 – 1.42, m                         | 19.4                                   | 19.4                                     |
| 6              | 1.67, m<br>2.12, ddd (3.0, 3.0, 12.4)                 | 1.69 – 1.66, m<br>2.16 – 2.09, m                         | 40.4                                   | 40.4                                     |
| 6a             |                                                       |                                                          | 80.5                                   | 80.6                                     |
| 6a-Me          | 1.25, s                                               | 1.26, s                                                  | 20.7                                   | 20.7                                     |
| 7a             |                                                       |                                                          | 163.5                                  | 163.6                                    |
| 8              | 6.25, s                                               | 6.25, s                                                  | 96.7                                   | 96.8                                     |
| 9              |                                                       |                                                          | 158.3                                  | 158.3                                    |
| 11             |                                                       |                                                          | 164.7                                  | 164.7                                    |
| 11a            |                                                       |                                                          | 98.4                                   | 98.4                                     |
| 12             | 2.51, dd (4.8, 16.9)<br>2.22, dd (12.9, 16.9)         | 2.51, dd (4.7, 16.9)<br>2.23, dd (12.9, 16.9)            | 17.2                                   | 17.2                                     |
| 12a            | 1.49, dd (4.8, 12.9)                                  | 1.49, dd (4.9, 12.9)                                     | 51.6                                   | 51.6                                     |
| 12b            |                                                       |                                                          | 36.9                                   | 36.9                                     |
| 12b-Me         | 0.91, s                                               | 0.91                                                     | 15.1                                   | 15.1                                     |
| 1'             |                                                       |                                                          | 124.0                                  | 124.0                                    |
| 2'             | 7.73, d (8.8)                                         | 7.73, d (8.9)                                            | 127.0                                  | 127.0                                    |
| 3'             | 6.93, d (8.8)                                         | 6.93, d (8.9)                                            | 114.2                                  | 114.2                                    |
| 4'             |                                                       |                                                          | 161.5                                  | 161.5                                    |
| 4'-OMe         | 3.85, s                                               | 3.85, s                                                  | 55.4                                   | 55.4                                     |
| 5'             | 6.93, d (8.8)                                         | 6.93, d (8.9)                                            | 114.2                                  | 114.2                                    |
| 6'             | 7.73, d (8.8)                                         | 7.73, d (8.9)                                            | 127.0                                  | 127.0                                    |

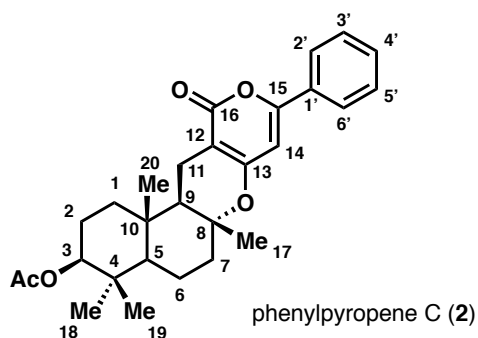

**Table 3: NMR Chemical Shift Comparison of Synthetic and Natural<sup>60</sup> Phenylpyropene C**

| Pos.  | Natural<br>$\delta_H$ [ppm, mult $J$ (Hz)]<br>400 MHz | Synthetic<br>$\delta_H$ [ppm, mult $J$ (Hz)]<br>600 MHz | Natural<br>$\delta_C$ [ppm]<br>101 MHz | Synthetic<br>$\delta_C$ [ppm]<br>151 MHz |
|-------|-------------------------------------------------------|---------------------------------------------------------|----------------------------------------|------------------------------------------|
| 1     | 1.18, ddd (4.8, 10.5, 15.0)<br>1.82, m                | 1.18, td (4.4, 13.3)<br>1.84 – 1.81, m                  | 37.42                                  | 37.4                                     |
| 2     | 1.78, m<br>1.68, m                                    | 1.77 – 1.72 m<br>1.70 – 1.68, m                         | 23.77                                  | 23.7                                     |
| 3     | 4.51, dd (4.8, 11.2)                                  | 4.51, dd (4.7, 11.8)                                    | 80.38                                  | 80.4                                     |
| 4     |                                                       |                                                         | 38.00                                  | 37.9                                     |
| 5     | 1.10, dd (1.6, 12.0)                                  | 1.09, dd (2.2, 12.2)                                    | 55.31                                  | 55.3                                     |
| 6*    | 1.79, m                                               | 1.80 – 1.78, m<br>1.49 – 1.41, m                        | 19.57                                  | 19.5                                     |
| 7     | 2.14, dt (3.2, 12.4)<br>1.71, m                       | 2.13, dt (3.2, 12.6)<br>1.68 – 1.65, m                  | 40.53                                  | 40.5                                     |
| 8     |                                                       |                                                         | 80.74                                  | 80.7                                     |
| 9     | 1.52, dd (4.4, 17.2)                                  | 1.51, dd (4.8, 12.9)                                    | 51.74                                  | 51.7                                     |
| 10    |                                                       |                                                         | 37.03                                  | 37.0                                     |
| 11    | 2.53, dd (4.4, 17.2)<br>2.25, dd (17.2, 17.2)         | 2.52, dd (4.8, 17.3)<br>2.25, dd (4.4, 17.3)            | 17.57                                  | 17.5                                     |
| 12    |                                                       |                                                         | 99.57                                  | 99.6                                     |
| 13    |                                                       |                                                         | 163.36                                 | 163.4                                    |
| 14    | 6.37, s                                               | 6.37, s                                                 | 98.50                                  | 98.5                                     |
| 15    |                                                       |                                                         | 158.38                                 | 158.4                                    |
| 3-OAc | 2.06, s                                               | 2.06, s                                                 | 21.53<br>170.97                        | 21.5<br>171.1                            |
| 16    |                                                       |                                                         | 164.62                                 | 164.7                                    |
| 17    | 1.27, s                                               | 1.26, s                                                 | 28.36                                  | 28.3                                     |
| 18    | 0.92, s                                               | 0.91, s                                                 | 20.98                                  | 20.9                                     |
| 19    | 0.89, s                                               | 0.89, s                                                 | 16.91                                  | 16.8                                     |
| 20    | 0.95, s                                               | 0.94, s                                                 | 15.44                                  | 15.4                                     |
| 1'    |                                                       |                                                         | 131.65                                 | 131.7                                    |
| 2'    | 7.43, m                                               | 7.47 – 7.38, m                                          | 125.52                                 | 125.6                                    |
| 3'    | 7.43, m                                               | 7.47 – 7.38, m                                          | 128.98                                 | 129.0                                    |
| 4'    | 7.43, m                                               | 7.47 – 7.38, m                                          | 130.63                                 | 130.7                                    |
| 5'    | 7.43, m                                               | 7.82 – 7.75, m                                          | 128.98                                 | 129.0                                    |
| 6'    | 7.79, m                                               | 7.82 – 7.75, m                                          | 125.52                                 | 125.6                                    |

\*The reported  $^1H$  NMR is missing one C6 proton.

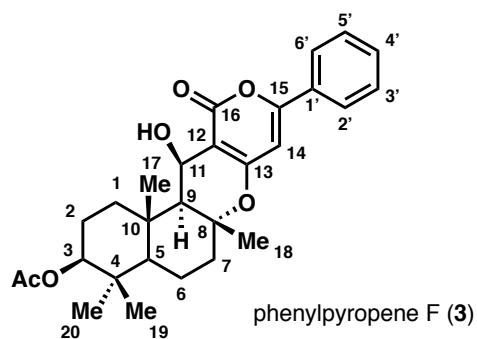

**Table 4: NMR Chemical Shift Comparison of Synthetic and Natural<sup>61</sup> Phenylpyropene F**

| Pos.  | Natural<br>$\delta_H$ [ppm, mult $J$ (Hz)]<br>500 MHz | Synthetic<br>$\delta_H$ [ppm, mult $J$ (Hz)]<br>600 MHz | Natural<br>$\delta_C$ [ppm]<br>126 MHz | Synthetic<br>$\delta_C$ [ppm]<br>151 MHz |
|-------|-------------------------------------------------------|---------------------------------------------------------|----------------------------------------|------------------------------------------|
| 1     | 2.12, m<br>1.42, m                                    | 2.12 – 2.09, m<br>1.43 – 1.37, m                        | 36.3                                   | 36.3                                     |
| 2     | 1.81, m<br>1.73, m                                    | 1.85 – 1.80, m<br>1.74 – 1.71, m                        | 23.0                                   | 23.0                                     |
| 3     | 4.53, dd (4.8, 12.0)                                  | 4.51, dd (4.6, 11.8)                                    | 80.6                                   | 80.6                                     |
| 4     |                                                       |                                                         | 37.8                                   | 37.8                                     |
| 5     | 1.13, m                                               | 1.12, dd (2.1, 11.9)                                    | 55.2                                   | 55.3                                     |
| 6     | 1.75, m<br>1.67, m                                    | 1.77 – 1.74, m<br>1.69 – 1.64, m                        | 19.1                                   | 19.2                                     |
| 7     | 2.15, m<br>1.78, m                                    | 2.16 – 2.12, m<br>1.80 – 1.77, m                        | 41.5                                   | 41.5                                     |
| 8     |                                                       |                                                         | 81.8                                   | 81.9                                     |
| 9     | 1.50, d (3.8)                                         | 1.49, d (3.6)                                           | 55.6                                   | 55.7                                     |
| 10    |                                                       |                                                         | 37.4                                   | 37.4                                     |
| 11    | 4.94, d (3.8)                                         | 4.94, d (3.6)                                           | 59.1                                   | 59.1                                     |
| 12    |                                                       |                                                         | 102.2                                  | 102.2                                    |
| 13    |                                                       |                                                         | 164.0                                  | 164.0                                    |
| 14    | 6.62, s                                               | 6.62, s                                                 | 98.3                                   | 98.3                                     |
| 15    |                                                       |                                                         | 159.5                                  | 159.6                                    |
| 16    |                                                       |                                                         | 164.6                                  | 164.6                                    |
| 17    | 1.40, s                                               | 1.43 – 1.37, s                                          | 15.4                                   | 15.6                                     |
| 18    | 1.68, s                                               | 1.67, s                                                 | 19.7                                   | 19.7                                     |
| 19    | 0.90, s                                               | 0.89, s                                                 | 16.2                                   | 16.2                                     |
| 20    | 0.93, s                                               | 0.93, s                                                 | 27.2                                   | 27.2                                     |
| 3-OAc | 2.04, s                                               | 2.03, s                                                 | 21.4<br>171.3                          | 21.4<br>171.4                            |
| 1'    |                                                       |                                                         | 131.1                                  | 131.1                                    |
| 2'    | 7.84, d (7.8)                                         | 7.86 – 7.82, m                                          | 125.2                                  | 125.2                                    |
| 3'    | 7.48, dd (7.8, 8.0)                                   | 7.50 – 7.45, m                                          | 128.7                                  | 128.7                                    |
| 4'    | 7.48, d (7.8)                                         | 7.50 – 7.45, m                                          | 130.6                                  | 130.7                                    |
| 5'    | 7.48, dd (7.8, 8.0)                                   | 7.50 – 7.45, m                                          | 128.7                                  | 128.7                                    |
| 6'    | 7.84, d (7.8)                                         | 7.86 – 7.82, m                                          | 125.2                                  | 125.2                                    |

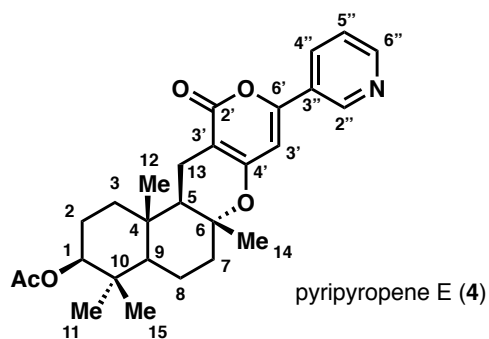

**Table 5: NMR Chemical Shift Comparison of Synthetic and Natural<sup>62</sup> Pyripyropene E**

| Pos.  | Natural<br>$\delta_H$ [ppm, mult $J$ (Hz)]<br>400 MHz | Synthetic<br>$\delta_H$ [ppm, mult $J$ (Hz)]<br>600 MHz | Natural<br>$\delta_C$ [ppm]<br>101 MHz | Synthetic<br>$\delta_C$ [ppm]<br>151 MHz |
|-------|-------------------------------------------------------|---------------------------------------------------------|----------------------------------------|------------------------------------------|
| 1     | 4.49, dd (4.5, 11.5)                                  | 4.51, dd (4.7, 11.8)                                    | 80.1                                   | 80.1                                     |
| 2     | 1.70, m<br>1.70, m                                    | 1.77 – 1.72, m<br>1.71 – 1.67, m                        | 23.5                                   | 23.4                                     |
| 3     | 1.17, m<br>1.78, m                                    | 1.19, td (3.9, 13.2)<br>1.81 – 1.78, m                  | 37.1                                   | 37.1                                     |
| 4     |                                                       |                                                         | 37.7                                   | 37.7                                     |
| 5     | 1.50, dd (4.5, 12.5)                                  | 1.51, dd (4.8, 12.9)                                    | 51.4                                   | 51.4                                     |
| 6     |                                                       |                                                         | 80.8                                   | 80.8                                     |
| 7     | 2.13, dt (3.0, 12.5)<br>1.68, m                       | 2.14, dt (3.2, 12.6)<br>1.67 – 1.63, m                  | 40.2                                   | 40.2                                     |
| 8     | 1.80, m<br>1.44, m                                    | 1.85 – 1.81, m<br>1.50 – 1.40, m                        | 19.2                                   | 19.2                                     |
| 9     | 1.08, m                                               | 1.09, dd (2.2, 12.2)                                    | 55.0                                   | 55.0                                     |
| 10    |                                                       |                                                         | 36.7                                   | 36.7                                     |
| 11    | 0.90, s                                               | 0.91, s                                                 | 28.1                                   | 28.0                                     |
| 12    | 0.88, s                                               | 0.89, s                                                 | 15.1                                   | 15.1                                     |
| 13    | 2.51, dd (3.0, 17.0)<br>2.23, dd (13.0, 17.0)         | 2.52, dd (4.7, 17.1)<br>2.25, dd (12.9, 17.1)           | 17.3                                   | 17.3                                     |
| 14    | 1.26, s                                               | 1.27, s                                                 | 20.7                                   | 20.7                                     |
| 15    | 0.93, s                                               | 0.94, s                                                 | 16.6                                   | 16.6                                     |
| 1-OAc | 2.05, s                                               | 2.06, s                                                 | 21.1<br>170.8                          | 21.2<br>170.8                            |
| 2'    |                                                       |                                                         | 163.9                                  | 164.0                                    |
| 3'    |                                                       |                                                         | 100.2                                  | 100.2                                    |
| 4'    |                                                       |                                                         | 162.8                                  | 162.8                                    |
| 5'    | 6.41, s                                               | 6.42, s                                                 | 99.3                                   | 99.3                                     |
| 6'    |                                                       |                                                         | 155.6                                  | 155.6                                    |
| 2''   | 8.97, d (2.0)                                         | 8.99, dd (0.9, 2.4)                                     | 146.6                                  | 146.6                                    |
| 3''   |                                                       |                                                         | 127.6                                  | 127.6                                    |
| 4''   | 8.08, ddd (1.5, 2.5, 8.0)                             | 8.10, ddd (1.6, 2.4, 8.1)                               | 132.7                                  | 132.7                                    |
| 5''   | 7.37, dd (4.5, 8.0)                                   | 7.38, ddd (0.9, 4.8, 8.1)                               | 123.5                                  | 123.5                                    |
| 6''   | 8.63, dd (1.5, 4.5)                                   | 8.65, dd (1.6, 4.8)                                     | 151.0                                  | 151.1                                    |

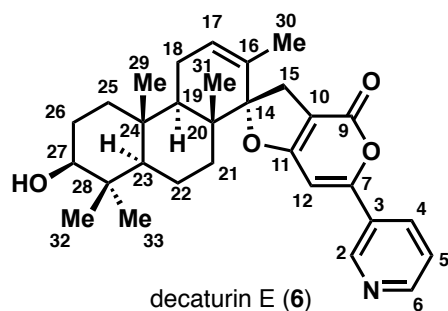

**Table 6: NMR Chemical Shift Comparison of Synthetic and Natural<sup>63</sup> Decaturin E**

| Pos.   | Natural<br>$\delta_H$ [ppm, mult $J$ (Hz)]<br>600 MHz | Synthetic<br>$\delta_H$ [ppm, mult $J$ (Hz)]<br>600 MHz | Natural<br>$\delta_C$ [ppm]<br>151MHz | Synthetic<br>$\delta_C$ [ppm]<br>151 MHz |
|--------|-------------------------------------------------------|---------------------------------------------------------|---------------------------------------|------------------------------------------|
| 2      | 9.07, d (1.9)                                         | 9.07, dd (2.4, 0.9)                                     | 146.7                                 | 146.7                                    |
| 3      |                                                       |                                                         | 127.2                                 | 127.2                                    |
| 4      | 8.23, ddd (1.4, 1.9, 8.2)                             | 8.23, ddd (1.6, 2.4, 8.1)                               | 133.1                                 | 133.1                                    |
| 5      | 7.54, dd (4.7, 8.2)                                   | 7.54, ddd (0.9, 4.8, 8.1)                               | 124.0                                 | 124.0                                    |
| 6      | 8.67, dd (1.4, 4.7)                                   | 8.67, dd (1.6, 4.8)                                     | 151.4                                 | 151.4                                    |
| 7      |                                                       |                                                         | 159.5                                 | 159.5                                    |
| 9      |                                                       |                                                         | 170.0                                 | 170.0                                    |
| 10     |                                                       |                                                         | 101.2                                 | 101.2                                    |
| 11     |                                                       |                                                         | 159.6                                 | 159.6                                    |
| 12     | 7.36, s                                               | 7.34, s                                                 | 94.2                                  | 94.2                                     |
| 14     |                                                       |                                                         | 100.1                                 | 100.1                                    |
| 15     | 3.01, d (16.1)<br>2.85, d (16.1)                      | 3.01, d (16.1)<br>2.86, d (16.1)                        | 27.8                                  | 27.8                                     |
| 16     |                                                       |                                                         | 130.9                                 | 130.9                                    |
| 17*    | 4.34, d (4.9)                                         | 4.34, d (5.2)                                           | 128.1                                 | 128.2                                    |
| 18     | 1.98, m                                               | 2.00 – 1.94, m                                          | 22.5                                  | 22.5                                     |
| 19     | 1.58, m                                               | 1.58–1.56, m                                            | 47.4                                  | 47.4                                     |
| 20     |                                                       |                                                         | 40.3                                  | 40.4                                     |
| 21     | 1.56, m<br>1.28, m                                    | 1.56, m<br>1.31, td (4.1, 12.7)                         | 31.7                                  | 31.7                                     |
| 22     | 1.52, m<br>1.41, m                                    | 1.54 – 1.49, m<br>1.42 – 1.37, m                        | 17.5                                  | 17.5                                     |
| 23     | 0.70, m                                               | 0.70, m                                                 | 54.5                                  | 54.5                                     |
| 24     |                                                       |                                                         | 36.4                                  | 36.4                                     |
| 25     | 1.60, m<br>0.91, m                                    | 1.59, m<br>0.93 – 0.90, m                               | 37.9                                  | 37.9                                     |
| 26     | 1.48, m                                               | 1.49 – 1.42, m                                          | 26.9                                  | 26.9                                     |
| 27     | 2.98, m                                               | 2.98, dd (3.7, 7.5)                                     | 76.8                                  | 76.8                                     |
| 28     |                                                       |                                                         | 38.4                                  | 38.4                                     |
| 29     | 0.89, s                                               | 0.89, s                                                 | 15.4                                  | 15.4                                     |
| 30     | 1.62, s                                               | 1.62, s                                                 | 18.1                                  | 18.1                                     |
| 31     | 0.87, s                                               | 0.88, s                                                 | 15.9                                  | 16.0                                     |
| 32     | 0.68, s                                               | 0.68, s                                                 | 16.0                                  | 16.0                                     |
| 33     | 0.86, s                                               | 0.87, s                                                 | 28.2                                  | 28.2                                     |
| 27-OH* | 5.66, br. s                                           | 5.66, br. s                                             |                                       |                                          |

\*These two proton signals were switched in the previously reported spectrum.

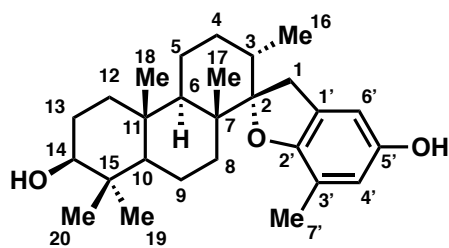

stypodiol (8)

**Table 7: NMR Chemical Shift Comparison of Synthetic and Natural<sup>64</sup> Stypodiol**

| Pos. | Natural<br>$\delta_H$ [ppm, mult $J$ (Hz)]<br>500 MHz | Synthetic<br>$\delta_H$ [ppm, mult $J$ (Hz)]<br>400 MHz | Natural<br>$\delta_C$ [ppm]<br>126 MHz | Synthetic<br>$\delta_C$ [ppm]<br>101 MHz |
|------|-------------------------------------------------------|---------------------------------------------------------|----------------------------------------|------------------------------------------|
| 1    | 2.72, d (16.5)<br>3.18, d (16.4)                      | 2.72, d (16.5)<br>3.18, dd (16.7)                       | 36.5                                   | 36.1                                     |
| 2    |                                                       |                                                         | 96.0                                   | 95.6                                     |
| 3    | 1.68, m                                               | 1.75 – 1.72, m                                          | 38.7                                   | 38.3                                     |
| 4    | 1.41, m<br>1.35, dd (4.2, 13.1)                       | 1.42 – 1.37, m<br>1.35, dd (4.4, 13.2)                  | 34.3                                   | 34.0                                     |
| 5    | 1.67, m<br>1.51, m                                    | 1.71 – 1.67, m<br>1.59 – 1.58, m                        | 28.5                                   | 28.1                                     |
| 6    | 1.54, m                                               |                                                         | 53.2                                   | 53.8                                     |
| 7    |                                                       |                                                         | 44.0                                   | 43.6                                     |
| 8    | 1.50, m<br>1.50, m                                    | 1.55 – 1.53, m<br>1.56 – 1.54, m                        | 32.7                                   | 32.4                                     |
| 9    | 1.59, m<br>1.49, m                                    | 1.63 – 1.60, m<br>1.51 – 1.50, m                        | 21.8                                   | 21.5                                     |
| 10   | 0.73, m                                               | 0.72, d (3.3)                                           | 56.9                                   | 56.6                                     |
| 11   |                                                       |                                                         | 38.6                                   | 38.2                                     |
| 12   | 1.47, m<br>1.00, m                                    | 1.49 – 1.47, m<br>1.04 – 0.97, m                        | 40.1                                   | 39.8                                     |
| 13   | 1.46, m<br>1.46, m                                    | 1.45 – 1.42<br>1.47 – 1.47                              | 19.3                                   | 18.9                                     |
| 14   | 3.13 dd, (5.1, 11.3)                                  | 3.12, dd (4.9, 11.5)                                    | 80.0                                   | 79.7                                     |
| 15   |                                                       |                                                         | 40.3                                   | 39.9                                     |
| 16   | 0.63, d (6.5)                                         | 0.62, d (6.5)                                           | 16.4                                   | 16.1                                     |
| 17   | 0.90, s                                               | 0.90, s                                                 | 18.0                                   | 17.6                                     |
| 18   | 0.86, s                                               | 0.86, s                                                 | 17.2                                   | 16.9                                     |
| 19   | 0.95, s                                               | 0.95, d (0.7)                                           | 29.0                                   | 28.6                                     |
| 20   | 0.73, s                                               | 0.73, s                                                 | 16.4                                   | 16.0                                     |
| 1'   |                                                       |                                                         | 128.4                                  | 128.1                                    |
| 2'   |                                                       |                                                         | 154.7                                  | 154.3                                    |
| 3'   |                                                       |                                                         | 119.4                                  | 119.1                                    |
| 4'   | 6.30, s                                               | 6.29, dt (0.8, 2.7)                                     | 116.4                                  | 116.1                                    |
| 5'   |                                                       |                                                         | 151.5                                  | 151.2                                    |
| 6'   | 6.33, s                                               | 6.34 – 6.31, m                                          | 109.8                                  | 109.5                                    |
| 7'   | 2.08, s                                               | 2.08, d (0.7)                                           | 15.9                                   | 15.6                                     |

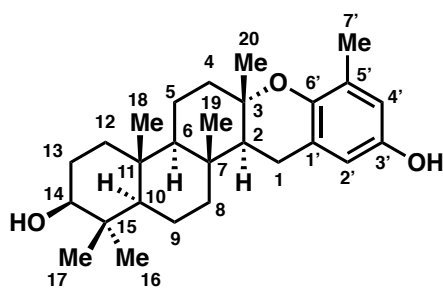taondiol (**10**)**Table 8: NMR Chemical Shift Comparison of Synthetic and Natural<sup>65</sup> Taondiol**

| Pos. | Natural<br>$\delta_H$ [ppm, mult $J$ (Hz)]<br>400 MHz | Synthetic<br>$\delta_H$ [ppm, mult $J$ (Hz)]<br>600 MHz | Natural<br>$\delta_C$ [ppm]<br>101 MHz | Synthetic<br>$\delta_C$ [ppm]<br>151 MHz |
|------|-------------------------------------------------------|---------------------------------------------------------|----------------------------------------|------------------------------------------|
| 1    | 2.56, d (5.1)<br>2.54, s                              | 2.55, d (8.4)<br>2.54, s                                | 22.6                                   | 22.8                                     |
| 2    | 1.60, m                                               | 1.60 – 1.59, m                                          | 52.5                                   | 52.6                                     |
| 3    | 1.65, m                                               | 1.70 – 1.67, m                                          | 76.1                                   | 76.2                                     |
| 4    | 1.65, m<br>1.03, m                                    | 1.70 – 1.67, m<br>1.06 – 1.02, m                        | 41.0                                   | 41.1                                     |
| 5    | 1.70, m<br>1.36, d (15.3)                             | 1.73 – 1.70, m<br>1.40 – 1.32, m                        | 18.7                                   | 18.9                                     |
| 6    | 0.96, d (12.2)                                        | 0.95, dd (2.0, 11.9)                                    | 60.6                                   | 60.7                                     |
| 7    |                                                       |                                                         | 36.9                                   | 37.0                                     |
| 8    | 2.03, d (14.2)<br>1.79, d (14.2)                      | 2.05 – 2.00, m<br>1.79, dt (3.6, 13.2)                  | 41.1                                   | 41.2                                     |
| 9    | 1.47, m<br>1.59, m                                    | 1.50 – 1.42, m<br>1.58 – 1.56, m                        | 17.9                                   | 18.1                                     |
| 10   | 0.79, d (11.7)                                        | 0.78, m                                                 | 55.4                                   | 55.5                                     |
| 11   |                                                       |                                                         | 37.2                                   | 37.3                                     |
| 12   | 1.63, m                                               | 1.65 – 1.61, m                                          | 27.3                                   | 27.5                                     |
| 13   | 1.76, d (14.8)<br>1.00, m                             | 1.75, dt (3.7, 13.0)<br>1.02 – 1.00, m                  | 38.4                                   | 38.5                                     |
| 14   | 3.22, dd (4.6, 11.2)                                  | 3.22, dd (4.7, 11.6)                                    | 78.8                                   | 79.0                                     |
| 15   |                                                       |                                                         | 38.9                                   | 90.0                                     |
| 16   | 0.98, s                                               | 0.98, s                                                 | 28.0                                   | 28.1                                     |
| 17   | 0.79, s                                               | 0.78, s                                                 | 15.3                                   | 15.4                                     |
| 18   | 0.86, s                                               | 0.85, s                                                 | 16.4                                   | 16.6                                     |
| 19   | 0.88, s                                               | 0.87, s                                                 | 15.8                                   | 16.0                                     |
| 20   | 1.13, s                                               | 1.13, s                                                 | 20.8                                   | 21.0                                     |
| 1'   |                                                       |                                                         | 122.4                                  | 122.5                                    |
| 2'   |                                                       |                                                         | 145.4                                  | 145.5                                    |
| 3'   |                                                       |                                                         | 127.1                                  | 127.3                                    |
| 4'   | 6.45, d (2.5)                                         | 6.45, d (3.0)                                           | 115.4                                  | 115.5                                    |
| 5'   |                                                       |                                                         | 147.8                                  | 147.9                                    |
| 6'   | 6.38, d (2.5)                                         | 6.38, d (3.0)                                           | 112.9                                  | 113.1                                    |
| 7'   | 2.09, s                                               | 2.12 – 2.06, m                                          | 16.1                                   | 16.3                                     |

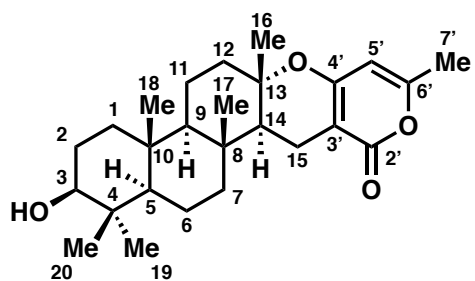

chevalone A (11)

**Table 9: NMR Chemical Shift Comparison of Synthetic and Natural<sup>66</sup> Chevalone A**

| Pos. | Natural<br>$\delta_H$ [ppm, mult $J$ (Hz)]<br>400 MHz | Synthetic<br>$\delta_H$ [ppm, mult $J$ (Hz)]<br>400 MHz | Natural<br>$\delta_C$ [ppm]<br>101 MHz | Synthetic<br>$\delta_C$ [ppm]<br>101 MHz |
|------|-------------------------------------------------------|---------------------------------------------------------|----------------------------------------|------------------------------------------|
| 1    | 1.72, m<br>0.96, m                                    | 1.76 – 1.71, m<br>0.94 – 0.91, m                        | 38.3                                   | 38.5                                     |
| 2    | 1.64, m<br>1.56, m                                    | 1.66 – 1.62, m<br>1.59 – 1.58, m                        | 27.2                                   | 27.4                                     |
| 3    | 3.18, dd (4.4, 11.2)                                  | 3.19, dd (4.9, 11.4)                                    | 78.7                                   | 78.9                                     |
| 4    |                                                       |                                                         | 38.8                                   | 39.0                                     |
| 5    | 0.75, m                                               | 0.79 – 0.74, m                                          | 55.3                                   | 55.5                                     |
| 6    | 1.55, m<br>1.45, m                                    | 1.58 – 1.55, m<br>1.46, dd (4.2, 7.4)                   | 17.8                                   | 18.1                                     |
| 7    | 1.82, tt (3.2, 13.2)<br>1.02, m                       | 1.84, dt (3.3, 12.8)<br>1.02, dd (4.2, 12.7)            | 40.9                                   | 41.1                                     |
| 8    |                                                       |                                                         | 37.2                                   | 37.4                                     |
| 9    | 0.89, dd (2.0, 12.2)                                  | 0.86 – 0.81, m                                          | 60.3                                   | 60.5                                     |
| 10   |                                                       |                                                         | 37.1                                   | 37.3                                     |
| 11   | 1.69, m<br>1.33, m                                    | 1.70 – 1.67, m<br>1.37 – 1.30, m                        | 18.6                                   | 18.8                                     |
| 12   | 2.05, td (3.0, 12.4)<br>1.59, m                       | 2.04, dt (3.2, 12.5)<br>1.62 – 1.59, m                  | 40.2                                   | 40.4                                     |
| 13   |                                                       |                                                         | 80.5                                   | 80.7                                     |
| 14   | 1.41, m                                               | 1.43 – 1.37, m                                          | 51.9                                   | 52.1                                     |
| 15   | 2.42, dd (4.8, 16.8)<br>2.14, m                       | 2.42, dd (4.9, 16.8)<br>2.13 – 2.08, m                  | 16.8                                   | 17.0                                     |
| 16   | 1.18, s                                               | 1.19, d (0.9)                                           | 20.5                                   | 20.7                                     |
| 17   | 0.86, s                                               | 0.87, d (0.8)                                           | 16.3                                   | 16.5                                     |
| 18   | 0.82, s                                               | 0.86 – 0.81, s                                          | 16.0                                   | 16.2                                     |
| 19   | 0.95, s                                               | 0.96, s                                                 | 27.9                                   | 28.1                                     |
| 20   | 0.77, s                                               | 0.79 – 0.74, s                                          | 15.2                                   | 15.4                                     |
| 1'   |                                                       |                                                         |                                        |                                          |
| 2'   |                                                       |                                                         | 165.3                                  | 165.5                                    |
| 3'   |                                                       |                                                         | 97.8                                   | 98.0                                     |
| 4'   |                                                       |                                                         | 163.2                                  | 163.4                                    |
| 5'   | 5.66, s                                               | 5.68, d (1.1)                                           | 100.6                                  | 100.8                                    |
| 6'   |                                                       |                                                         | 159.7                                  | 159.9                                    |
| 7'   | 2.16, s                                               | 2.17, s                                                 | 19.6                                   | 19.9                                     |



## References:

1. Corey, E. J. & Cheng, X.-M. *The Logic of Chemical Synthesis* (Wiley, 1995).
2. Turner, N. J. & O'Reilly, E. Biocatalytic retrosynthesis. *Nat. Chem. Biol.* **9**, 285–288 (2013).
3. Turner, N. J. Directed evolution drives the next generation of biocatalysts. *Nat. Chem. Biol.* **5**, 567–573 (2009).
4. Hung, K., Hu, X. & Maimone, T. Total synthesis of complex terpenoids employing radical cascade processes. *Nat. Prod. Rep.* **35**, 174–202 (2018).
5. Smith, J. M., Harwood, S. J. & Baran, P. S. Radical retrosynthesis. *Acc. Chem. Res.* **51**, 1807–1817 (2018).
6. Green, S. A. *et al.* The high chemofidelity of metal-catalyzed hydrogen atom transfer. *Acc. Chem. Res.* **51**, 2628–2640 (2018).
7. Matsuda, Y. & Abe, I. Biosynthesis of fungal meroterpenoids. *Nat. Prod. Rep.* **33**, 26–53 (2016).
8. Sunazuka, T. & Ōmura, S. Total synthesis of  $\alpha$ -pyrone meroterpenoids, novel bioactive microbial metabolites. *Chem. Rev.* **105**, 4559–4580 (2005).
9. Macías, F. A., Carrera, C. & Galindo, J. C. G. Brevianes revisited. *Chem. Rev.* **114**, 2717–2732 (2014).
10. Itoh, T. *et al.* Reconstitution of a fungal meroterpenoid biosynthesis reveals the involvement of a novel family of terpene cyclases. *Nat. Chem.* **2**, 858–864 (2010).
11. Corey, E. J., Noe, M. C. & Lin, S. A mechanistically designed bis-cinchona alkaloid ligand allows position- and enantioselective dihydroxylation of farnesol and other oligoprenyl derivatives at the terminal isopropylidene unit. *Tetrahedron Lett.* **36**, 8741–8744 (1995).
12. Smith, III, A. B., Kinso, T., Sunazuka, T. & Ōmura, S. Biomimetic total synthesis of the ACAT inhibitor (+)-pyripyropene E. *Tetrahedron Lett.* **37**, 6461–6464 (1996).
13. Kumanireng, A. S., Kato, T. & Kitahara, Y. Cyclization of polyenes x. biogenetic type synthesis of *dl*-taodiol. *Chem. Lett.* **2**, 1045–1047 (1973).
14. Nagamitsu, T. *et al.* Total synthesis of (+)-pyripyropene A, a potent, orally bioavailable inhibitor of Acyl-CoA:cholesterol acyltransferase. *J. Org. Chem.* **60**, 8126–8127 (1995).
15. Abad, A. *et al.* An efficient stereoselective synthesis of stypodiol and epistypodiol. *J. Org. Chem.* **63**, 5100–5106 (1998).
16. Takikawa, H., Imamura, Y. & Sasaki, M. Synthesis and absolute configuration of brevione B, an allelochemical isolated from *Penicillium* sp.. *Tetrahedron* **62**, 39–48 (2006).
17. Dixon, D. D., Lockner, J. W., Zhou, Q. & Baran, P. S. Scalable, divergent synthesis of meroterpenoids via “borono-sclareolide”. *J. Am. Chem. Soc.* **134**, 8432–8435 (2012).
18. Crossley, S. W. M., Obradors, C., Martinez, R. M. & Shenvi, R. A. Mn-, Fe-, and Co-catalyzed radical hydrofunctionalizations of olefins. *Chem. Rev.* **116**, 8912–9000 (2016).
19. Basabe, P. *et al.* Synthesis of (+)-makassaric acid, a protein kinase MK2 inhibitor. *Tetrahedron* **66**, 6008–6012 (2010).

20. Chen, M. S. & White, M. C. Combined effects on selectivity in Fe-catalyzed methylene oxidation. *Science* **327**, 566–571 (2010).
21. Quinn, R. K. *et al.* Site-selective aliphatic C–H chlorination using N-chloroamides enables a synthesis of chlorolissoclimide. *J. Am. Chem. Soc.* **138**, 696–702 (2016).
22. Kawamata, *et al.* Scalable, electrochemical oxidation of unactivated C–H bonds. *J. Am. Chem. Soc.* **139**, 7448–7451 (2017).
23. Chiappini, N. D., Mack, J. B. C. & Du Bois, J. Intermolecular C(sp<sup>3</sup>)–H amination of complex molecules. *Angew. Chem. Int. Ed.* **57**, 4956–4959 (2018).
24. Frija, L. M. T., Frade, R. F. M. & Afonso, C. A. M. Isolation, chemical, and biotransformation routes of labdane-type diterpenes. *Chem. Rev.* **111**, 4418–4452 (2011).
25. Zhang, K., El Damaty, S. & Fasan, R. P450 fingerprinting method for rapid discovery of terpene hydroxylating P450 catalysts with diversified regioselectivity. *J. Am. Chem. Soc.* **133**, 3242–3245 (2011).
26. Hall, E. A., Sarkar, M. R., Lee, J. H. Z., Munday, S. D. & Bell, S. G. Improving the monooxygenase activity and the regio- and stereoselectivity of terpenoid hydroxylation using Ester directing groups. *ACS Catal.* **6**, 6306–6317 (2016).
27. Aranda, G. *et al.* Microbial transformation of diterpenes: Hydroxylation of sclareol, manool and derivatives by *Mucor plumbeus*. *Tetrahedron* **47**, 8339–8350 (1991).
28. McLachlan, M. J., Johannes, T. W. & Zhao, H. Further improvement of phosphite dehydrogenase thermostability by saturation mutagenesis. *Biotechnol. Bioeng.* **99**, 268–274 (2008).
29. Lewis, J. C. *et al.* Combinatorial alanine substitution enables rapid optimization of cytochrome P450<sub>BM3</sub> for selective hydroxylation of large substrates. *ChemBioChem* **11**, 2502–2505 (2010).
30. Wong, T. S., Arnold, F. H. & Schwaneberg, U. Laboratory evolution of cytochrome P450 BM-3 monooxygenase for organic co-solvents. *Biotechnol. Bioeng.* **85**, 351–358 (2004).
31. Hubert, C. *et al.* Brønsted acid-catalyzed synthesis of pyrans *via* a formal [3+3] cycloaddition. *Adv. Synth. Catal.* **350**, 40–42 (2008).
32. Hsung, R. P., Kurdyumov, A. V. & Sydorenko, N. A formal [3 + 3] cycloaddition approach to natural product synthesis. *Eur. J. Org. Chem.* **1**, 23–44 (2005).
33. Iwasaki, K., Wan, K. K., Oppedisano, A., Crossley, S. W. M. & Shenvi, R. A. Simple, chemoselective hydrogenation with thermodynamic stereocontrol. *J. Am. Chem. Soc.* **136**, 1300–1303 (2014).
34. King, S. M., Ma, X. & Herzon, S. B. A method for the selective hydrogenation of alkenyl halides to alkyl halides. *J. Am. Chem. Soc.* **136**, 6884–6887 (2014).
35. Isayama, S. & Mukaiyama, T. A new method for preparation of alcohols from olefins with molecular oxygen and phenylsilane by the use of bis(acetylacetonato)cobalt(II). *Chem. Lett.* **18**, 1071–1074 (1989).
36. Lo, J. C. *et al.* Fe-catalyzed C–C bond construction from olefins via radicals. *J. Am. Chem. Soc.* **139**, 2484–2503 (2017).

37. Hua, S.-K., Wang, J., Chen, X.-B., Xu, Z.-Y. & Zeng, B.-B. Scalable synthesis of methyl ent-isocopalate and its derivatives. *Tetrahedron* **67**, 1142–1144 (2011).
38. Sandfort, F., O'Neill, M. J., Cornella, J., Wimmer, L. & Baran, P. S. Alkyl–(hetero)aryl bond formation via decarboxylative cross-coupling: a systematic analysis. *Angew. Chem. Int. Ed.* **56**, 3319–3323 (2017).
39. Everson, D. A., Shrestha, R. & Weix, D. J. Nickel-catalyzed reductive cross-coupling of aryl halides with alkyl halides. *J. Am. Chem. Soc.* **132**, 920–921 (2010).
40. Yokoe, H. *et al.* Enantiocontrolled total syntheses of breviones A, B, and C. *J. Am. Chem. Soc.* **133**, 8854–8857 (2011).
41. Chiba, K., Fukuda, M., Kim, S., Kitano, Y. & Tada, M. Dihydrobenzofuran synthesis by an anodic [3 + 2] cycloaddition of phenols and unactivated alkenes. *J. Org. Chem.* **64**, 7654–7656 (1999).
42. Falck, J. R. *et al.* Total synthesis of the spiro-*o*-benzoquinonefuran (-)-stypoldione. *J. Am. Chem. Soc.* **115**, 11606–11607 (1993).
43. Gerwick, W. H. & Fenical, W. Ichthyotoxic and cytotoxic metabolites of the tropical brown alga *Styopodium zonale* (Lamouroux) papenfuss. *J. Org. Chem.* **46**, 22–27 (1981).
44. King-Smith, E., Zwick, III, C. R. & Renata, H. Applications of oxygenases in the chemoenzymatic total synthesis of complex natural products. *Biochemistry* **57**, 403–412 (2018).
45. Loskot, S. A., Romney, D. K., Arnold, F. H. & Stoltz, B. M. Enantioselective total synthesis of nigelladine A via late-stage C–H oxidation enabled by an engineered P450 enzyme. *J. Am. Chem. Soc.* **139**, 10196–10199 (2017).
46. Lowell, A. N., *et al.* Chemoenzymatic total synthesis and structural diversification of tylactone-based macrolide antibiotics through late-stage polyketide assembly, tailoring, and C–H functionalization. *J. Am. Chem. Soc.* **139**, 7913–7920 (2017).
47. Latham, J., Henry, J.-M., Sharif, H. H., Menon, B. R. K., Shepherd, S. A. & Micklefield, J. Integrated catalysis opens new arylation pathways via regiodivergent enzymatic C–H activation. *Nature Commun.* **7**, 11873 (2016).
48. Durak, J. J., Payne, J. T. & Lewis, J. C. Late-stage diversification of biologically-active molecules via chemoenzymatic C–H functionalization. *ACS Catal.* **6**, 1451–1454 (2016).
49. Kulcitki, V., Harghel, P. & Ungur, N. Unusual cyclic terpenoids with terminal pendant prenyl moieties: from occurrence to synthesis. *Nat. Prod. Rep.* **31**, 1686–1720 (2014).
50. Domingo, V., Arteaga, J. F., Quilez del Moral, J. F. & Barrero, A. F. Unusually cyclized triterpenes: occurrence, biosynthesis and chemical synthesis. *Nat. Prod. Rep.* **26**, 115–134 (2009).
51. Katritzky, A. R., Wang, Z., Wang, M., Hall, C. D., Suzuki, K. Facile synthesis of 2,2-dimethyl-6(2-oxoalkyl)-1,3-dioxin-4-ones and the corresponding 6-substituted 4-hydroxy-2-pyrones. *J. Org. Chem.* **70**, 4854–4856 (2005).
52. Schmidt, D., Conrad, J., Klaiber, I., Beifuss, U. Synthesis of the bis-potassium salts of 5-hydroxy-3-oxopent-4-enoic acids and their use for the efficient preparation of 4-hydroxy-2H-pyran-2-ones and other heterocycles. *Chem. Commun.* **45**, 4732–4734 (2006).

53. Maloney, D. J., Hecht, S. M. A stereocontrolled synthesis of  $\delta$ -*trans*-tocotrienoloic acid. *Org. Lett.* **7**, 4297–4300 (2005).
54. Cerezo, S., Moreno-Mañas, M., Pleixats, R. 3-Aryl and 5-aryl-4-methoxy-6-methyl-2H-pyran-2-ones by Suzuki cross-coupling reactions of 3- and 5-halogeno-4-methoxy-6-methyl-2H-pyran-2-ones. *Tetrahedron* **54**, 7813–7818 (1998).
55. Blum, T. R., Zhu, Y., Nordeen, S. A., Yoon, T. P. Photocatalytic synthesis of dihydrobenzofurans by oxidative [3+2] cycloaddition. *Angew. Chem. Int. Ed.* **53**, 11056–11059 (2014).
56. Handa, M., Sunazuka, T., Sugawara, A., Harigaya, Y., Otoguro, K., Omura, S. Total syntheses of the AChE inhibitors ( $\pm$ )-arisugacins F and G. *J. Antibiot.* **56**, 730–733 (2003).
57. Mori, K., Koga, Y. Synthesis and absolute configuration of (–)-stypoldione, a metabolite of *Sypodium zonale*. *Liebigs Ann.* 1755 (1995).
58. Dethe, D. H., Mahapatra, S., Sau, S. K. Enantioselective total synthesis and assignment of the absolute configuration of the meroterpenoid (+)-taondiol. *Org. Lett.* **20**, 2766–2769 (2018).
59. Otoguro, K., Shiomi, K., Yamaguchi, Y., Arai, N., Sunazuka, T., Masuma, R., Iwai, Y., Omura, S. Arisugacins C and D, novel acetylcholinesterase inhibitors and their related novel metabolites produced by *Penicillium* sp. FO-4259-11. *J. Antibiot.* **53**, 50–57 (2000).
60. Rho, M.-C., Lee, H. S., Chang, K.-T., Song, H.-Y., Kwon, O. E., Lee, S. W., Ko, J. S., Hong, S. G., Kim, Y.-K. Phenylpyropene C, a new inhibitor of acyl-CoA: cholesterol acyltransferase produced by *Penicillium giseofulvum* F1959. *J. Antibiot.* **55**, 211–214 (2002).
61. Ding, Z., Zhang, L., Fu, J., Che, Q., Li, D., Gu, Q., Zhu, T. Phenylpyropenes E and F: new meroterpenes from the marine-derived fungus *Penicillium concentricum* ZLQ-69. *J. Antibiot.* **68**, 748–751 (2015).
62. Tomoda, H., Tabata, N., Yang, D.-J., Takayanagi, H., Nishida, H., Omura, S., Kaneko, T. Pyripyropenes, novel AC AT inhibitors produced by *Aspergillus fumigatus*. *J. Antibiot.* **48**, 495–503 (1995).
63. Wang, P.-L., Li, D.-Y., Xie, L.-R., Wu, X., Hua, H.-M., Li, Z.-L. Novel decaturin alkaloids from the marine-derived fungus *Penicillium oxalicum*. *Nat. Prod. Commun.* **8**, 1397–1398 (2013).
64. Dorta, E., Cueto, M., Díaz-Marrero, A. R., Darias, J. Stypolactone, an interesting diterpenoid from the brown alga *Stypodium zonale*. *Tet. Lett.* **43**, 9043–9046 (2002).
65. Wessels, M., König, G. M., Wright, A. D. A new tyrosine kinase inhibitor from the marine brown alga *Stypodium zonale*. *J. Nat. Prod.* **62**, 927–930 (1999).
66. Kanokmedhakul, K., Kanokmedhakul, S., Suwannatrai, R., Soyong, K., Prabpai, S., Kongsaree, P. Bioactive meroterpenoids and alkaloids from the fungus *Eurotium chevalieri*. *Tetrahedron* **67**, 5461–5468 (2011).

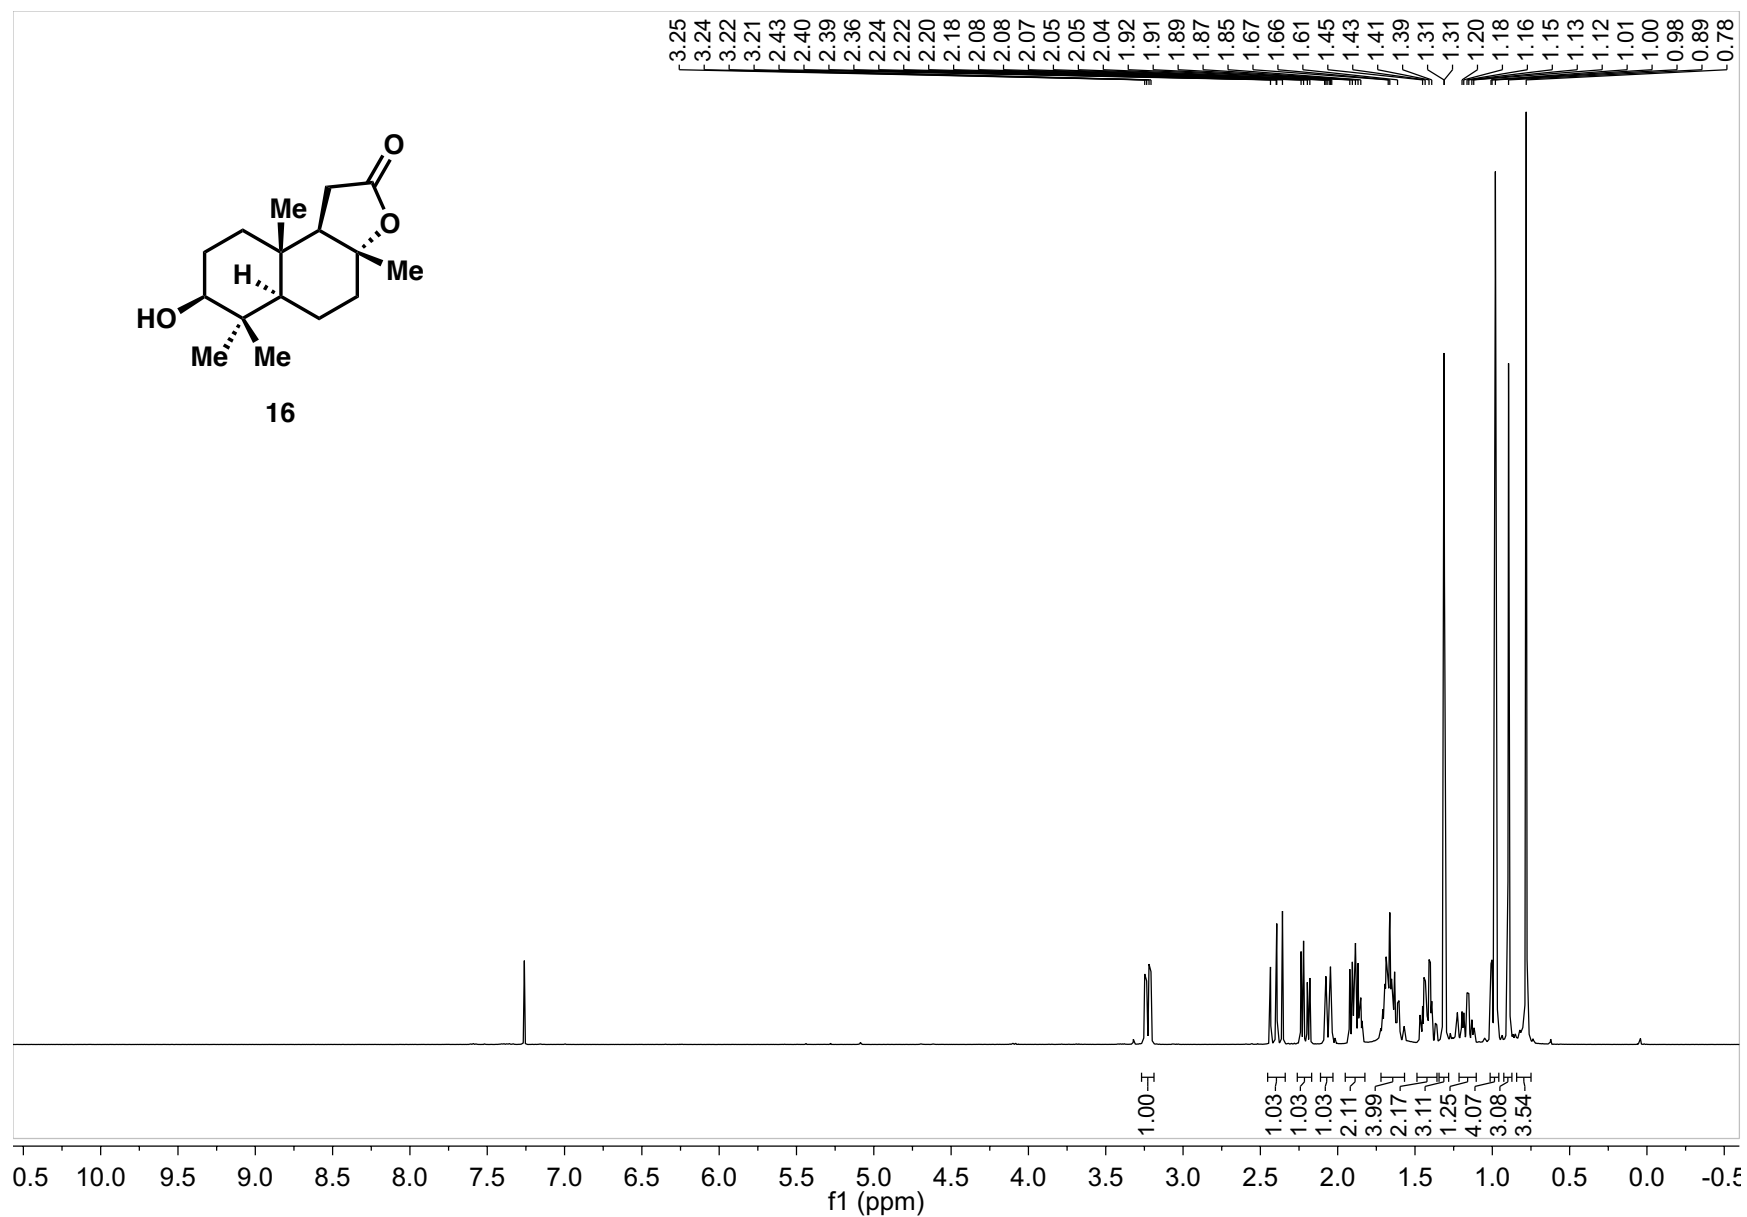

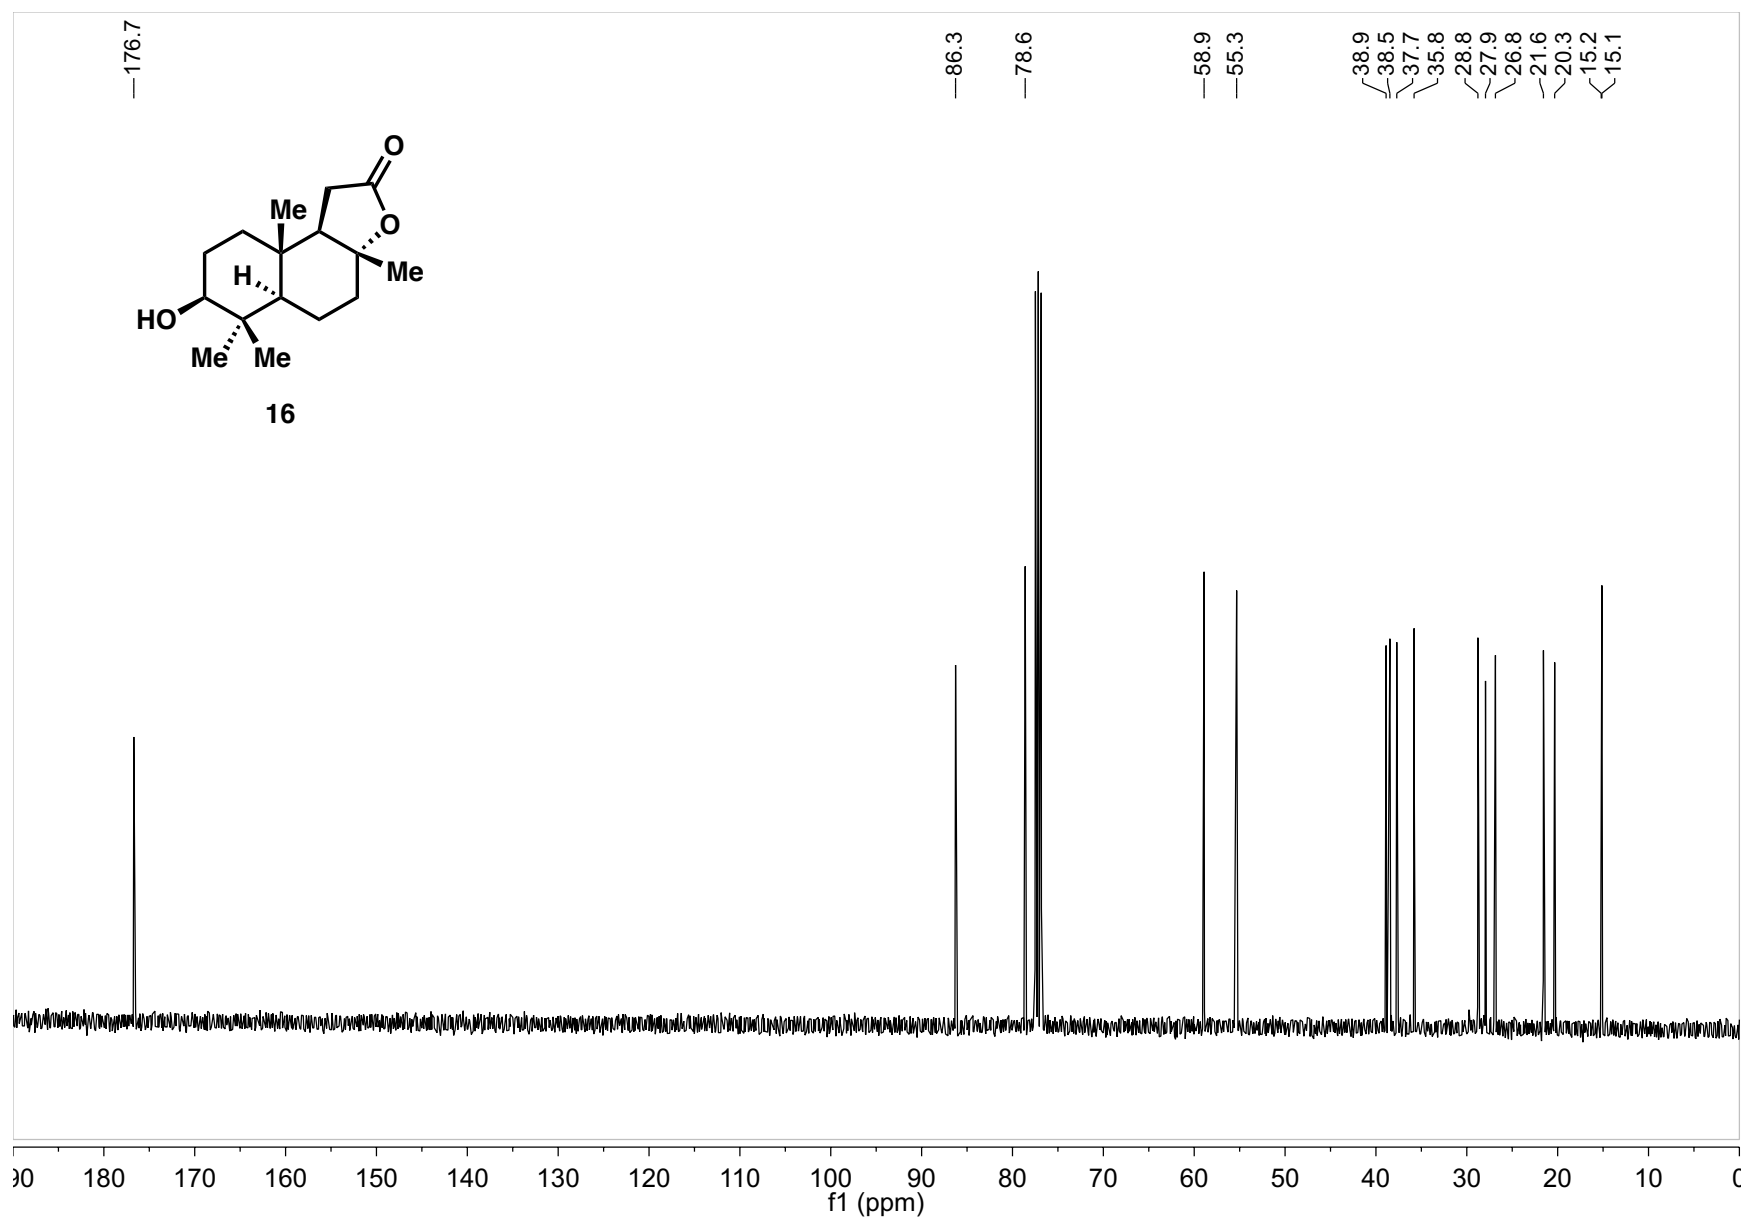

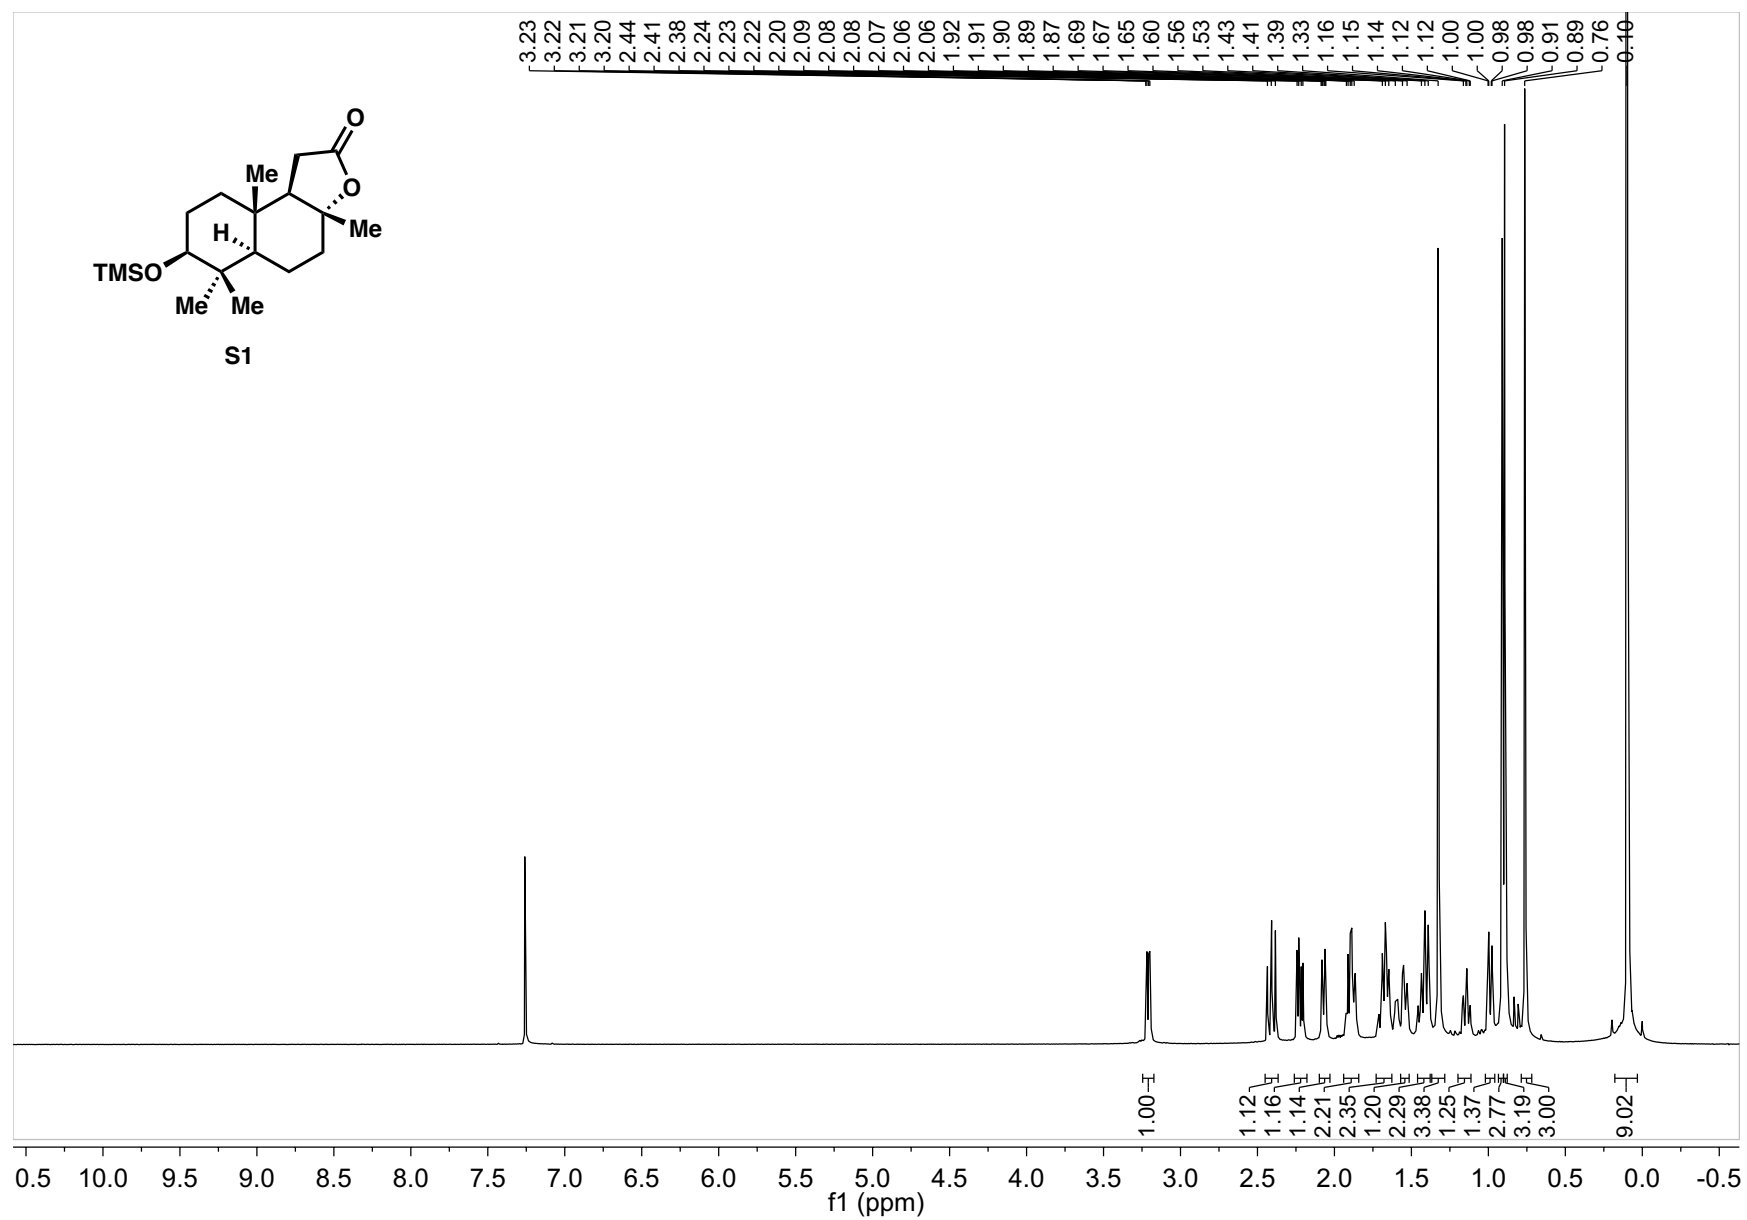

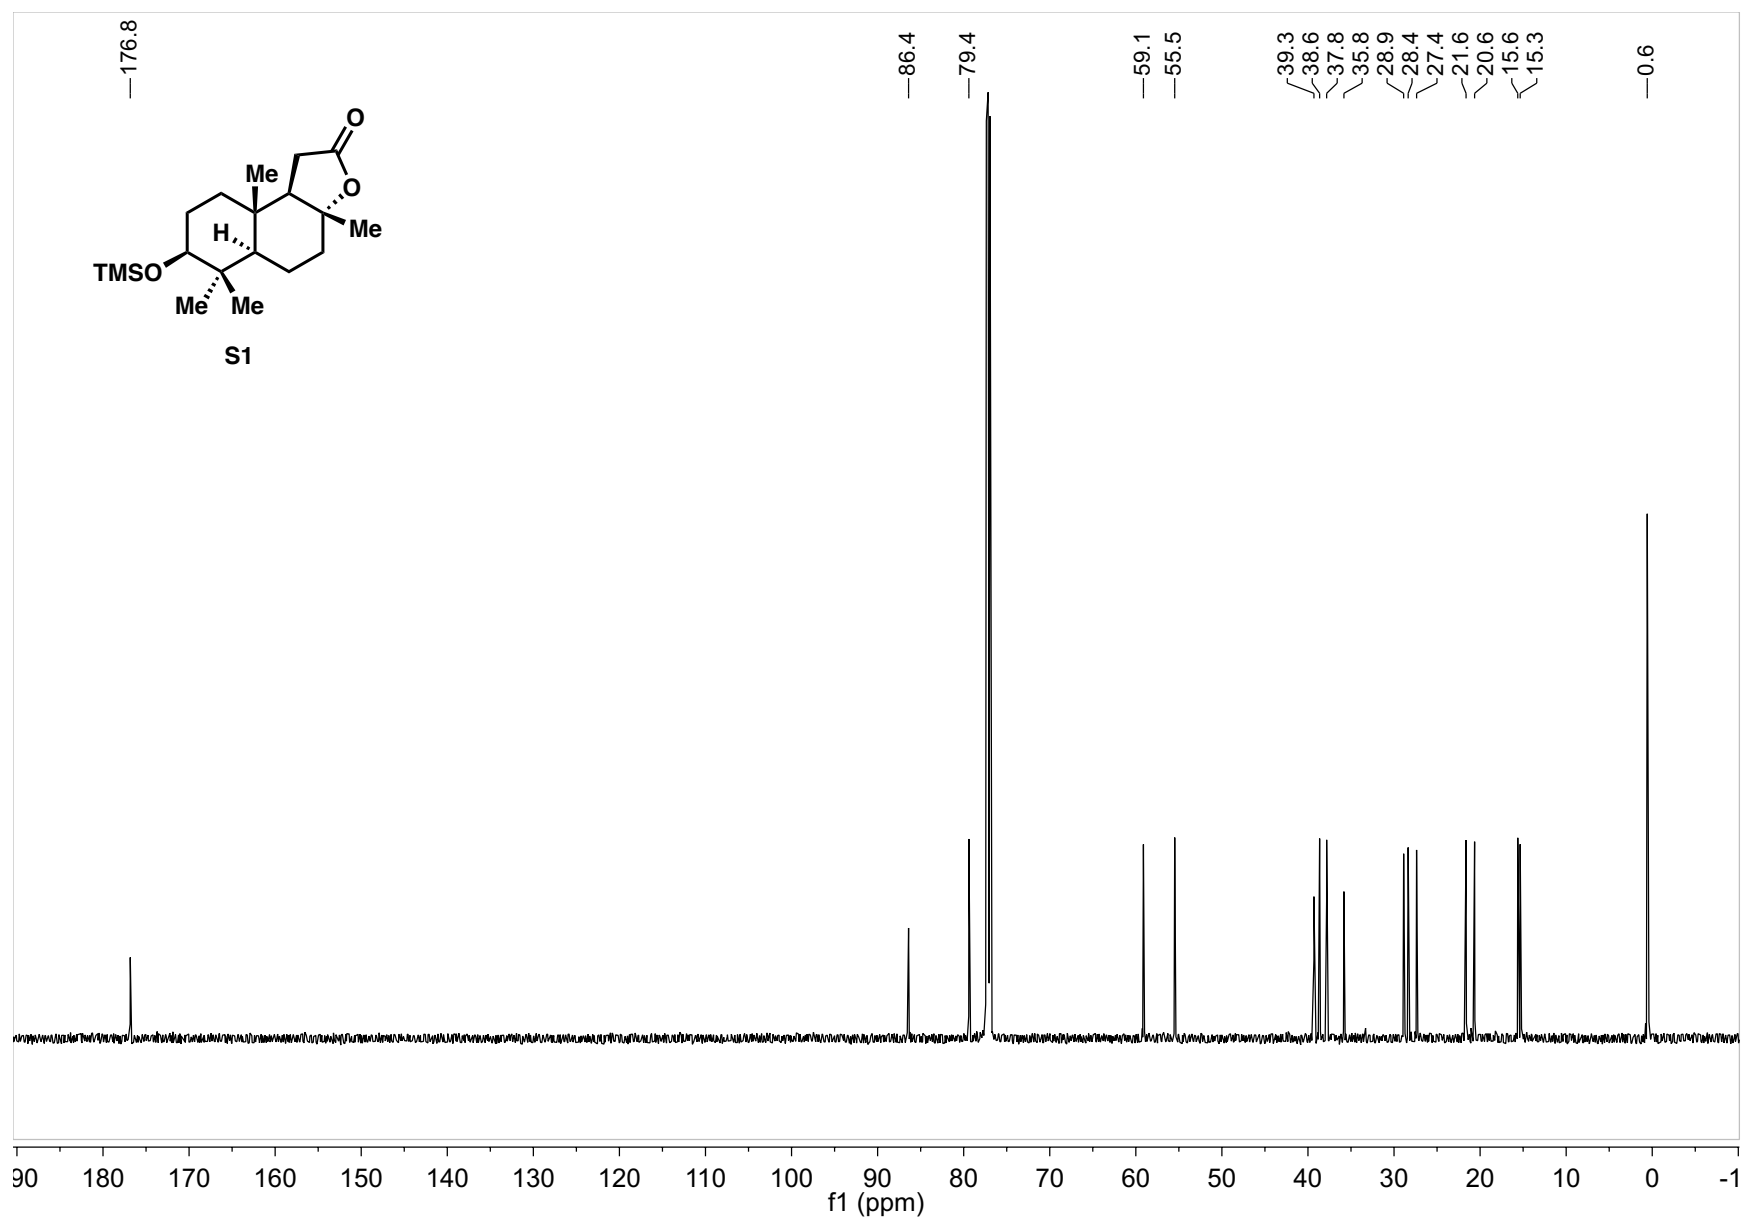

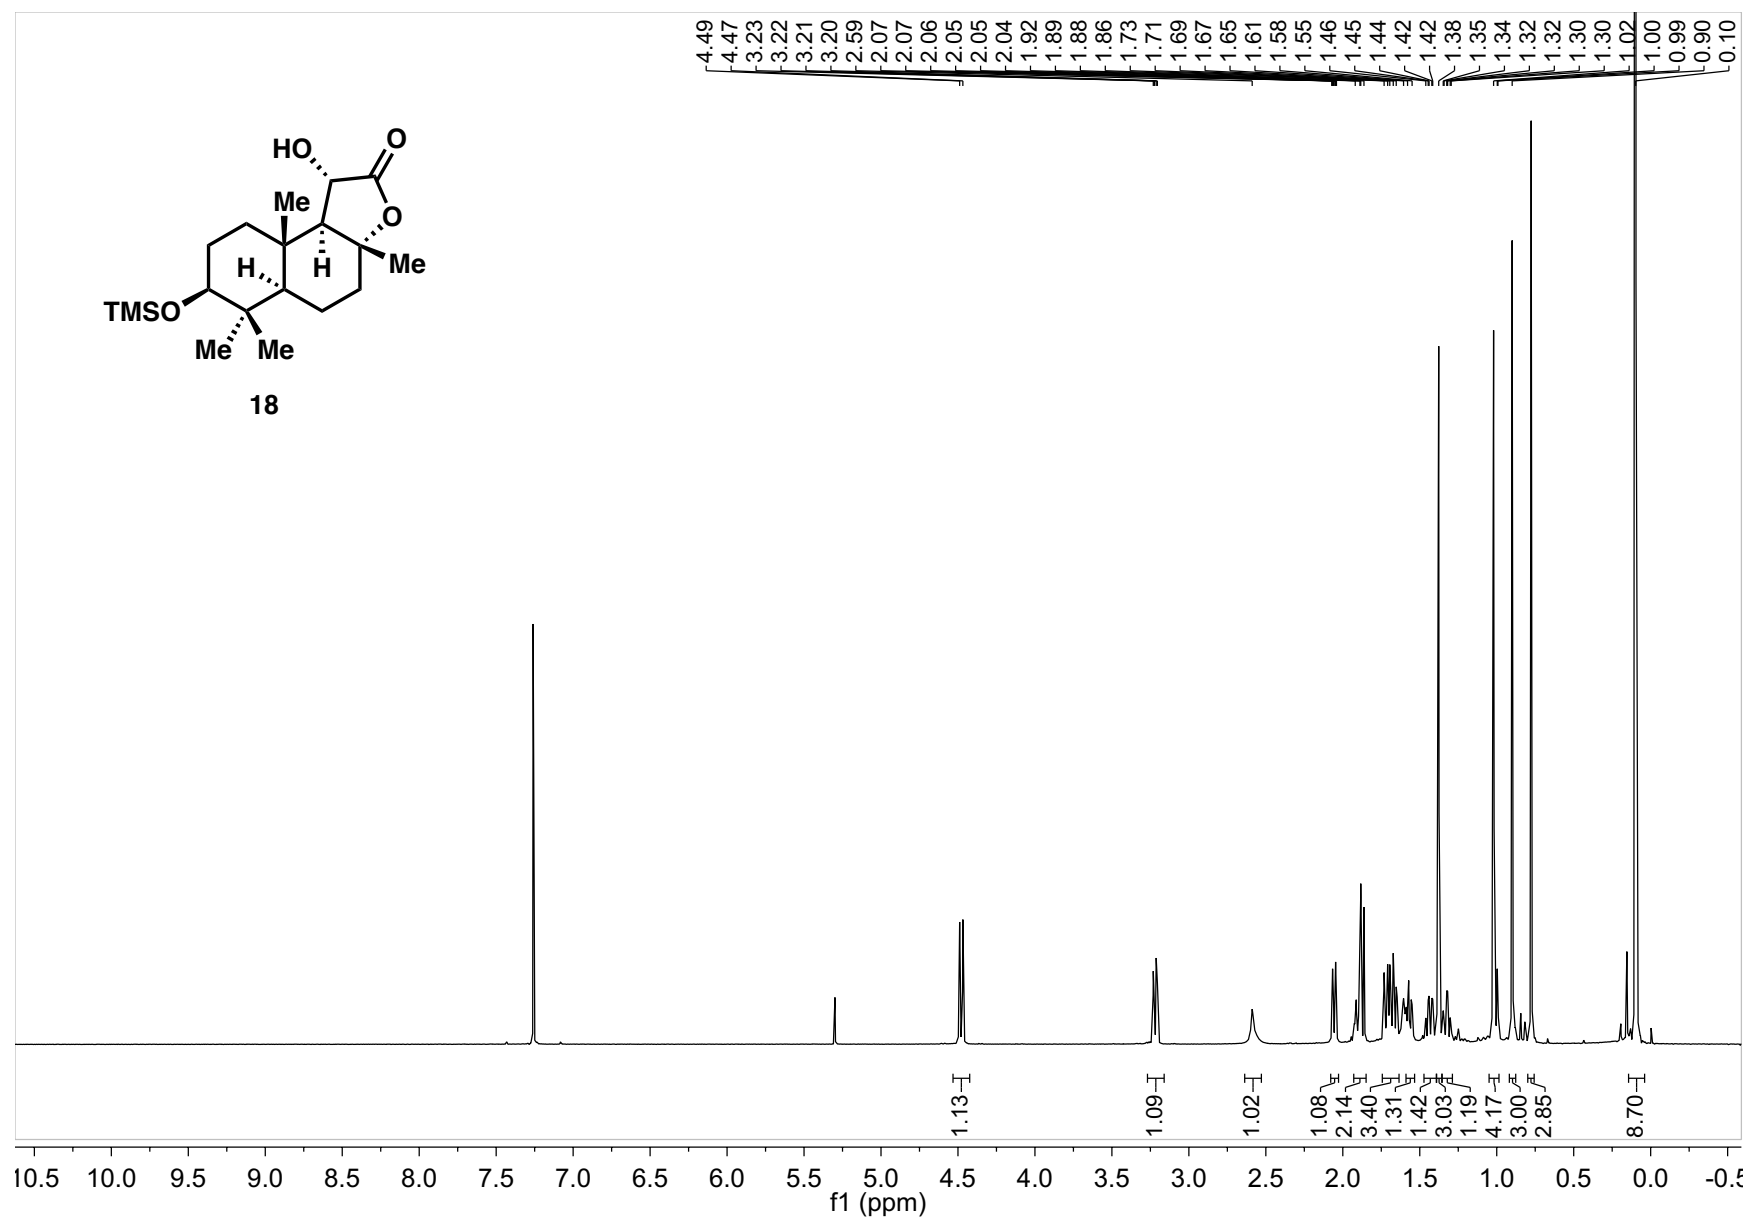

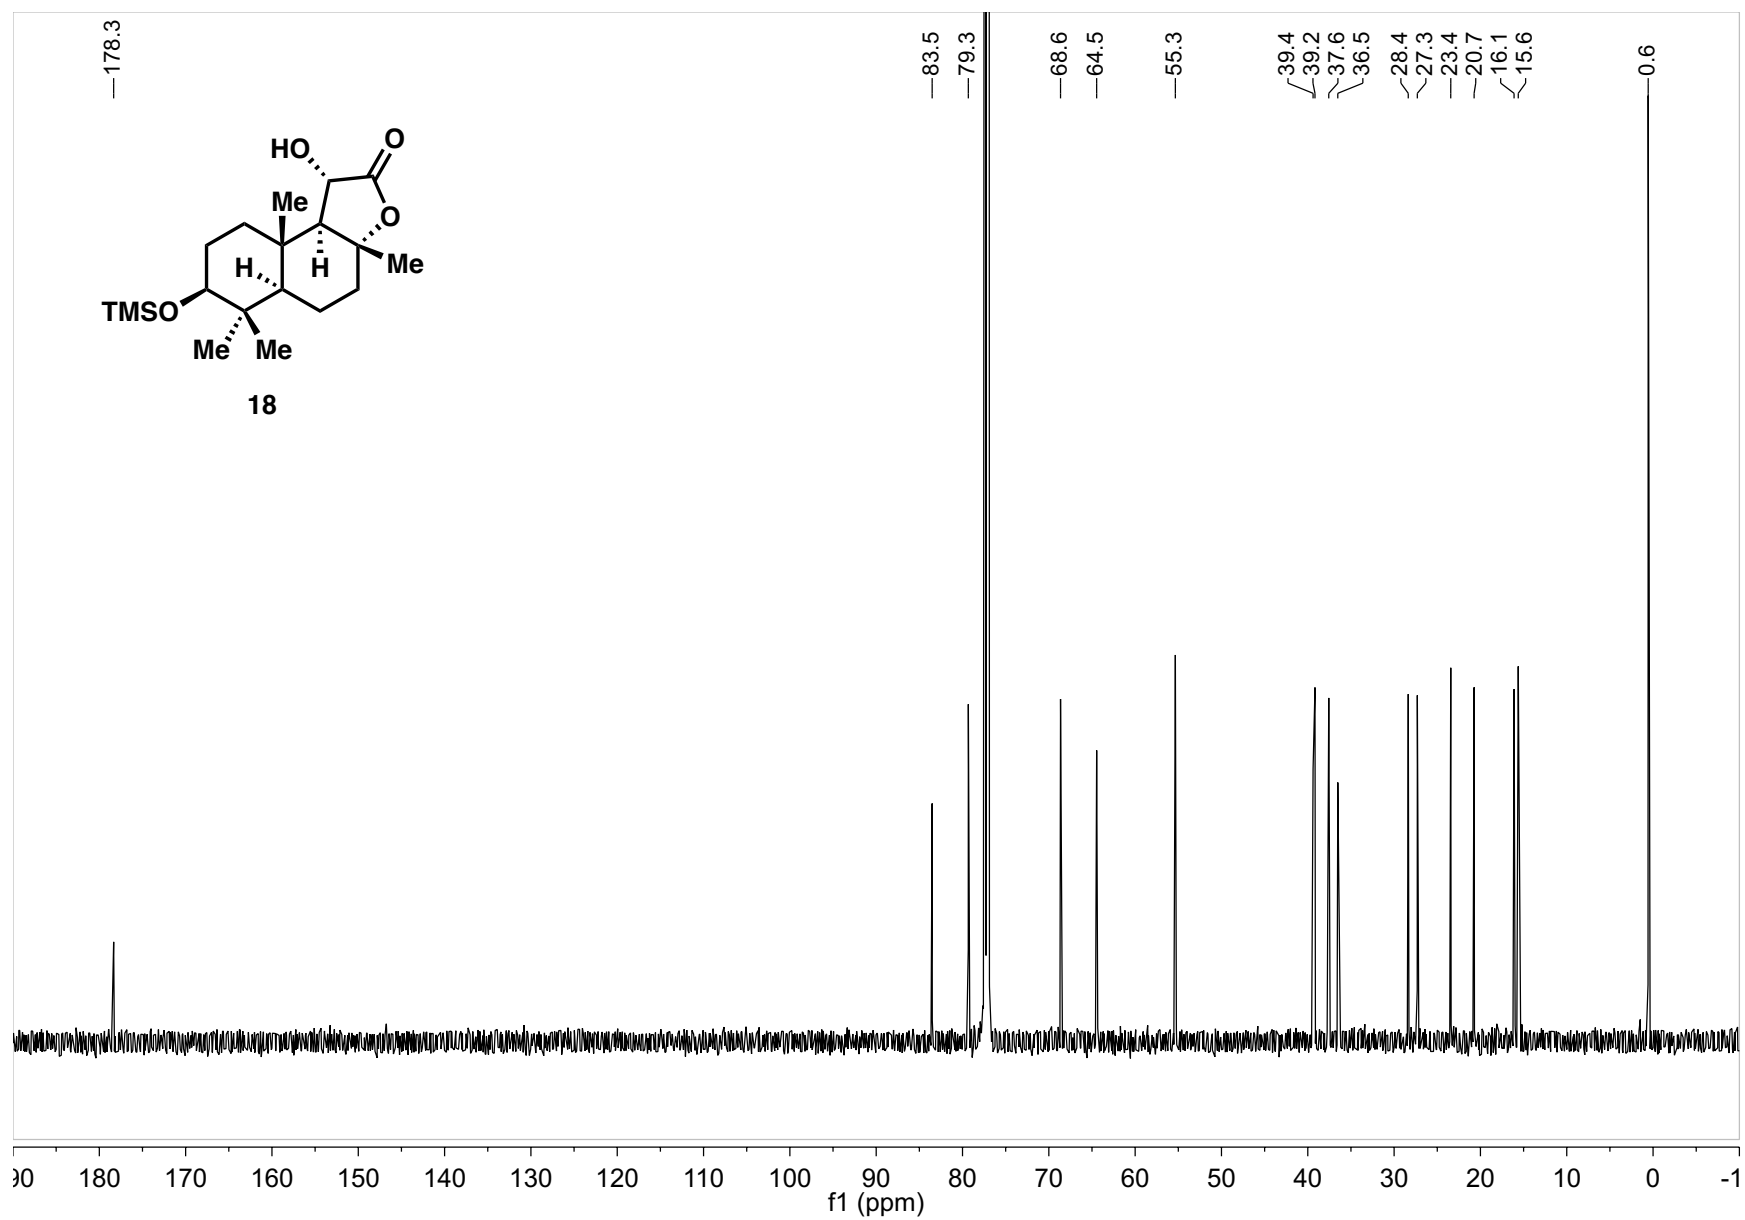

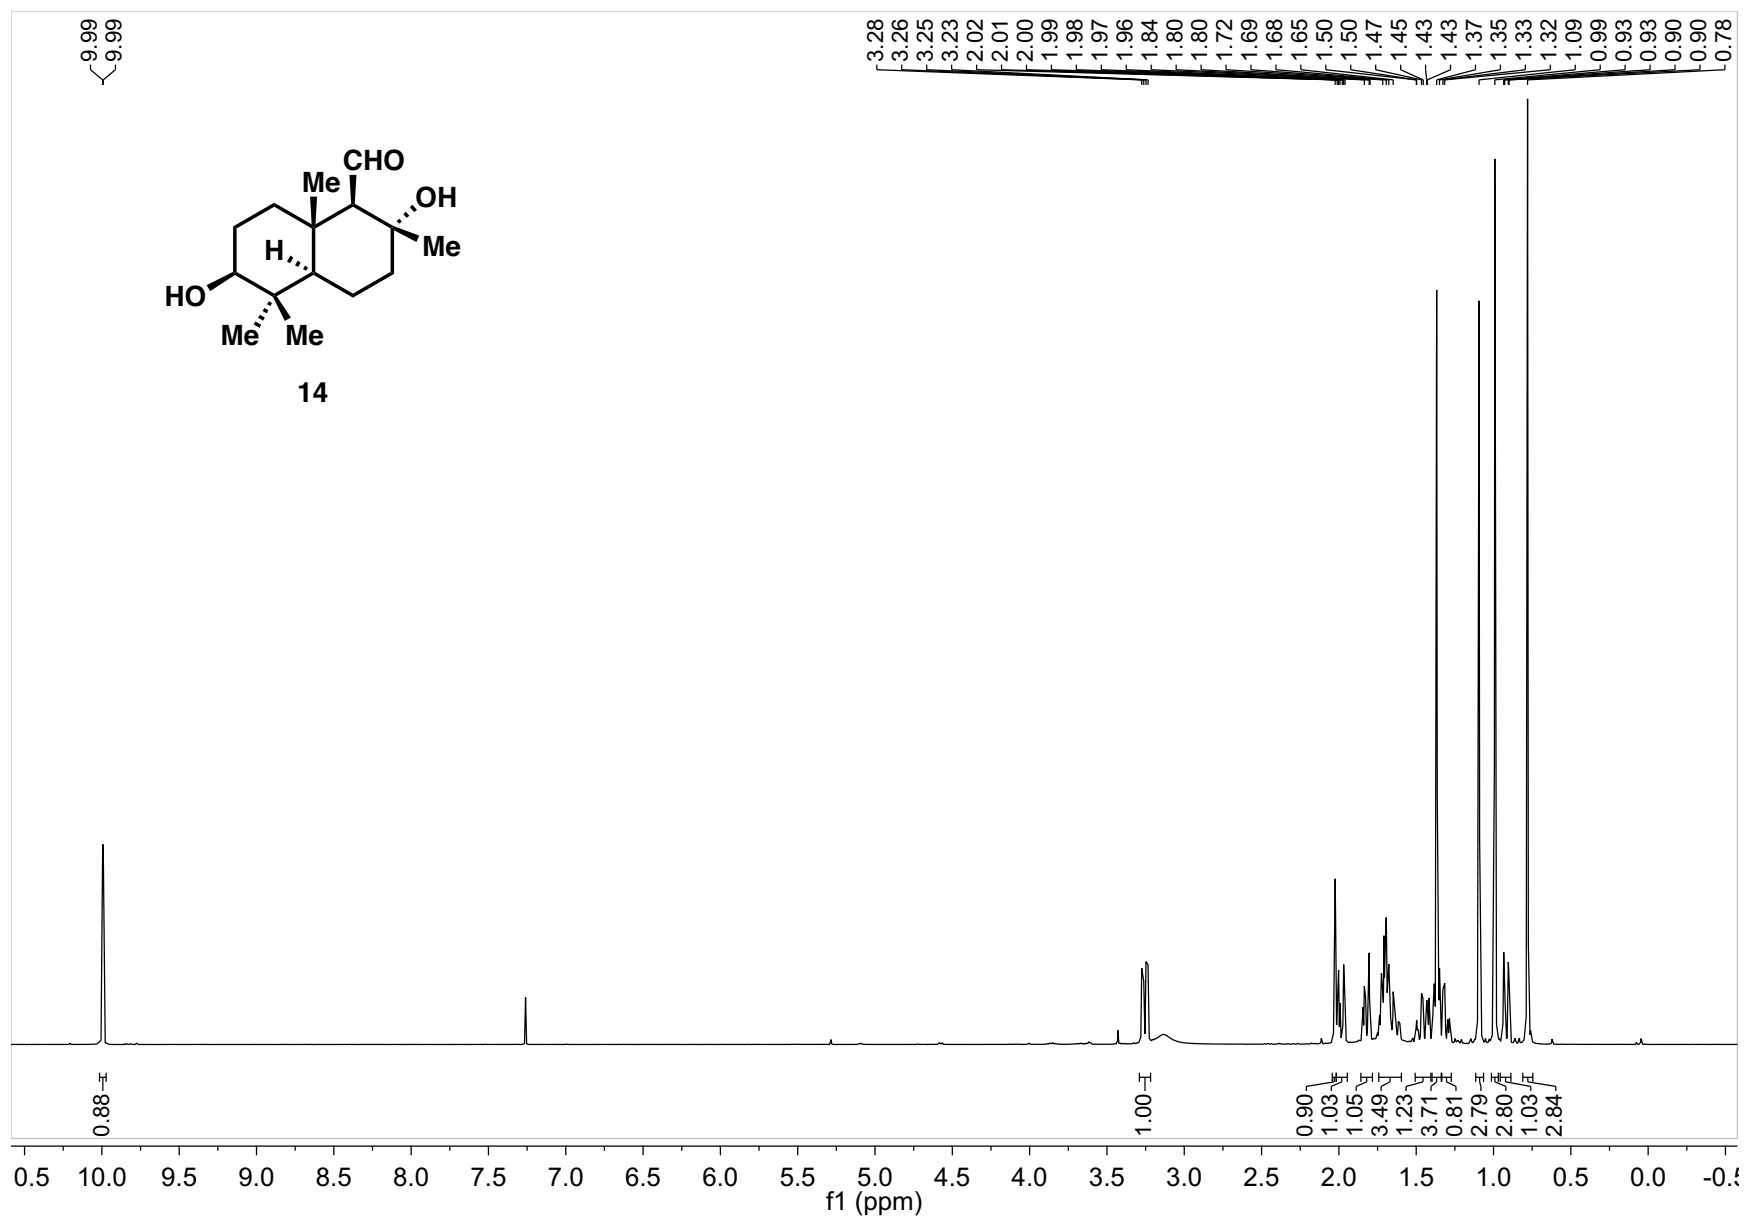

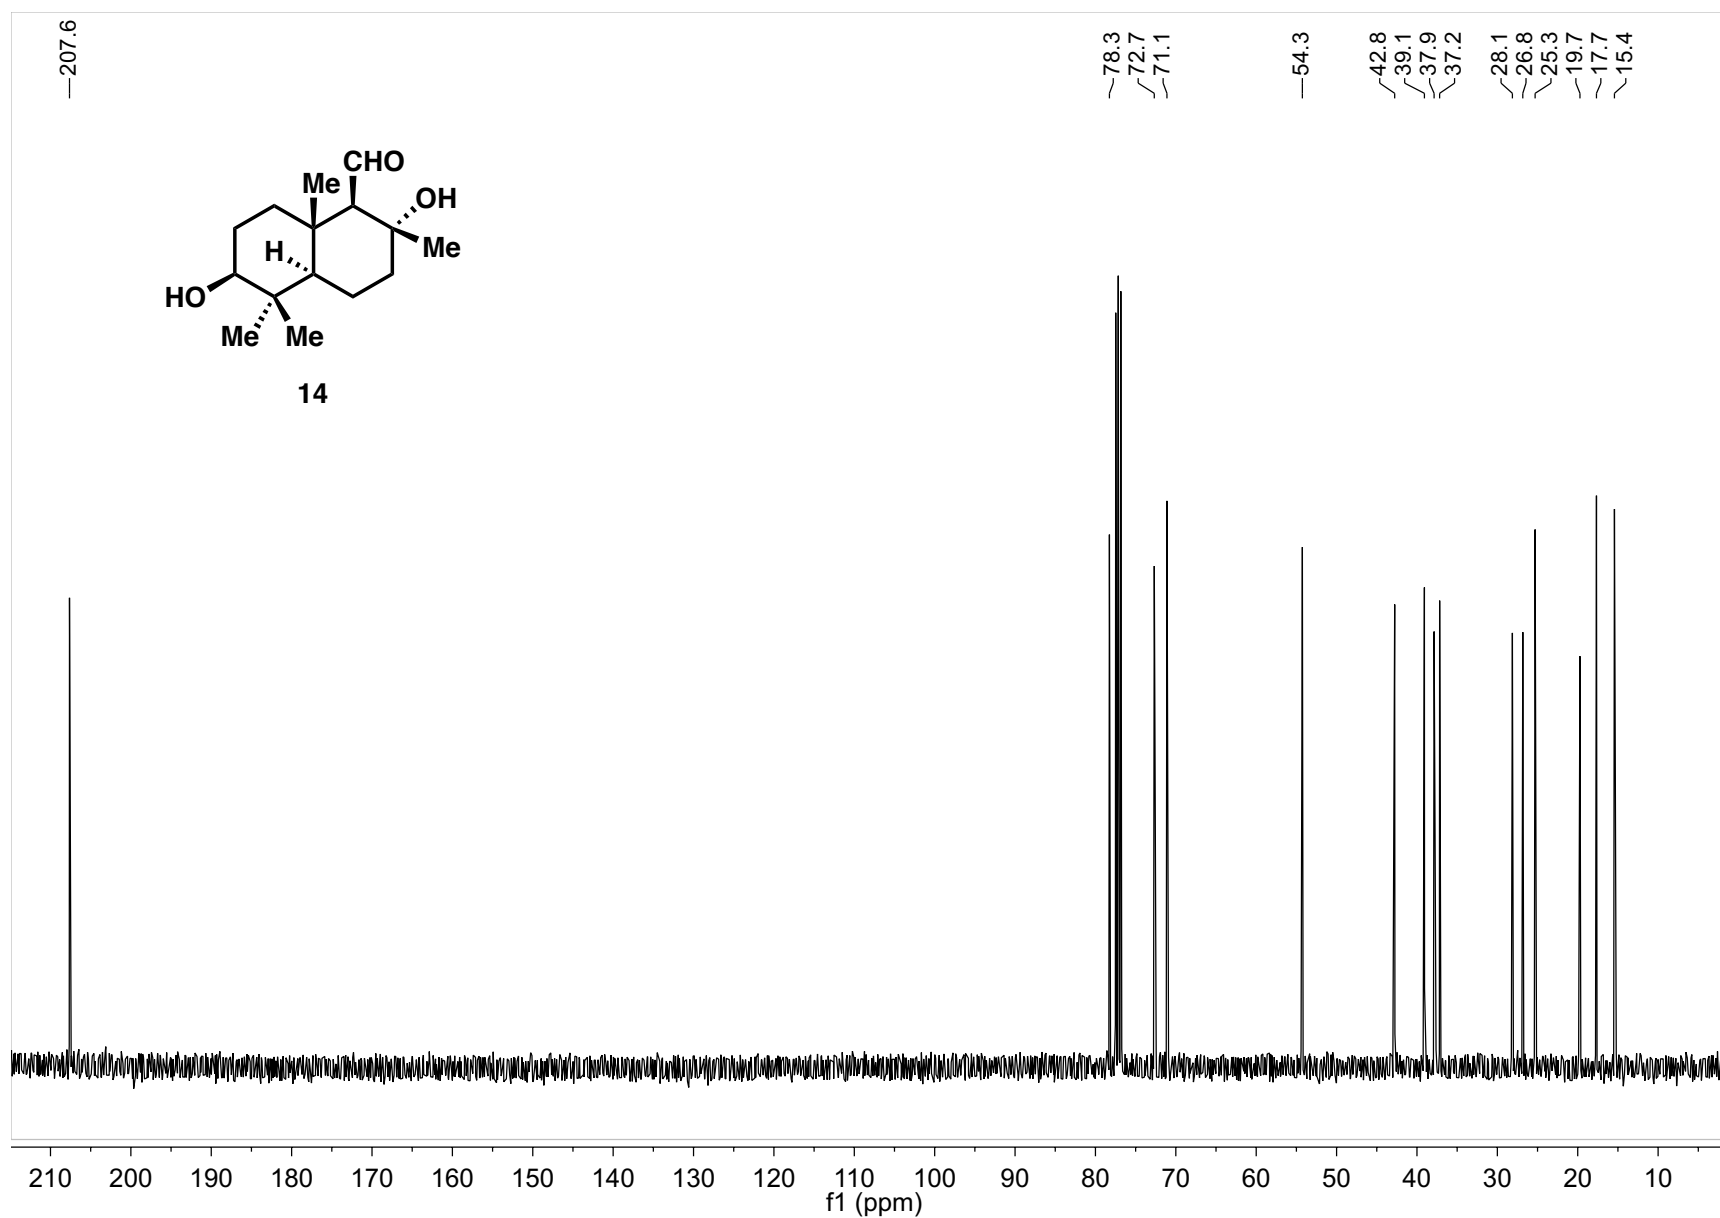

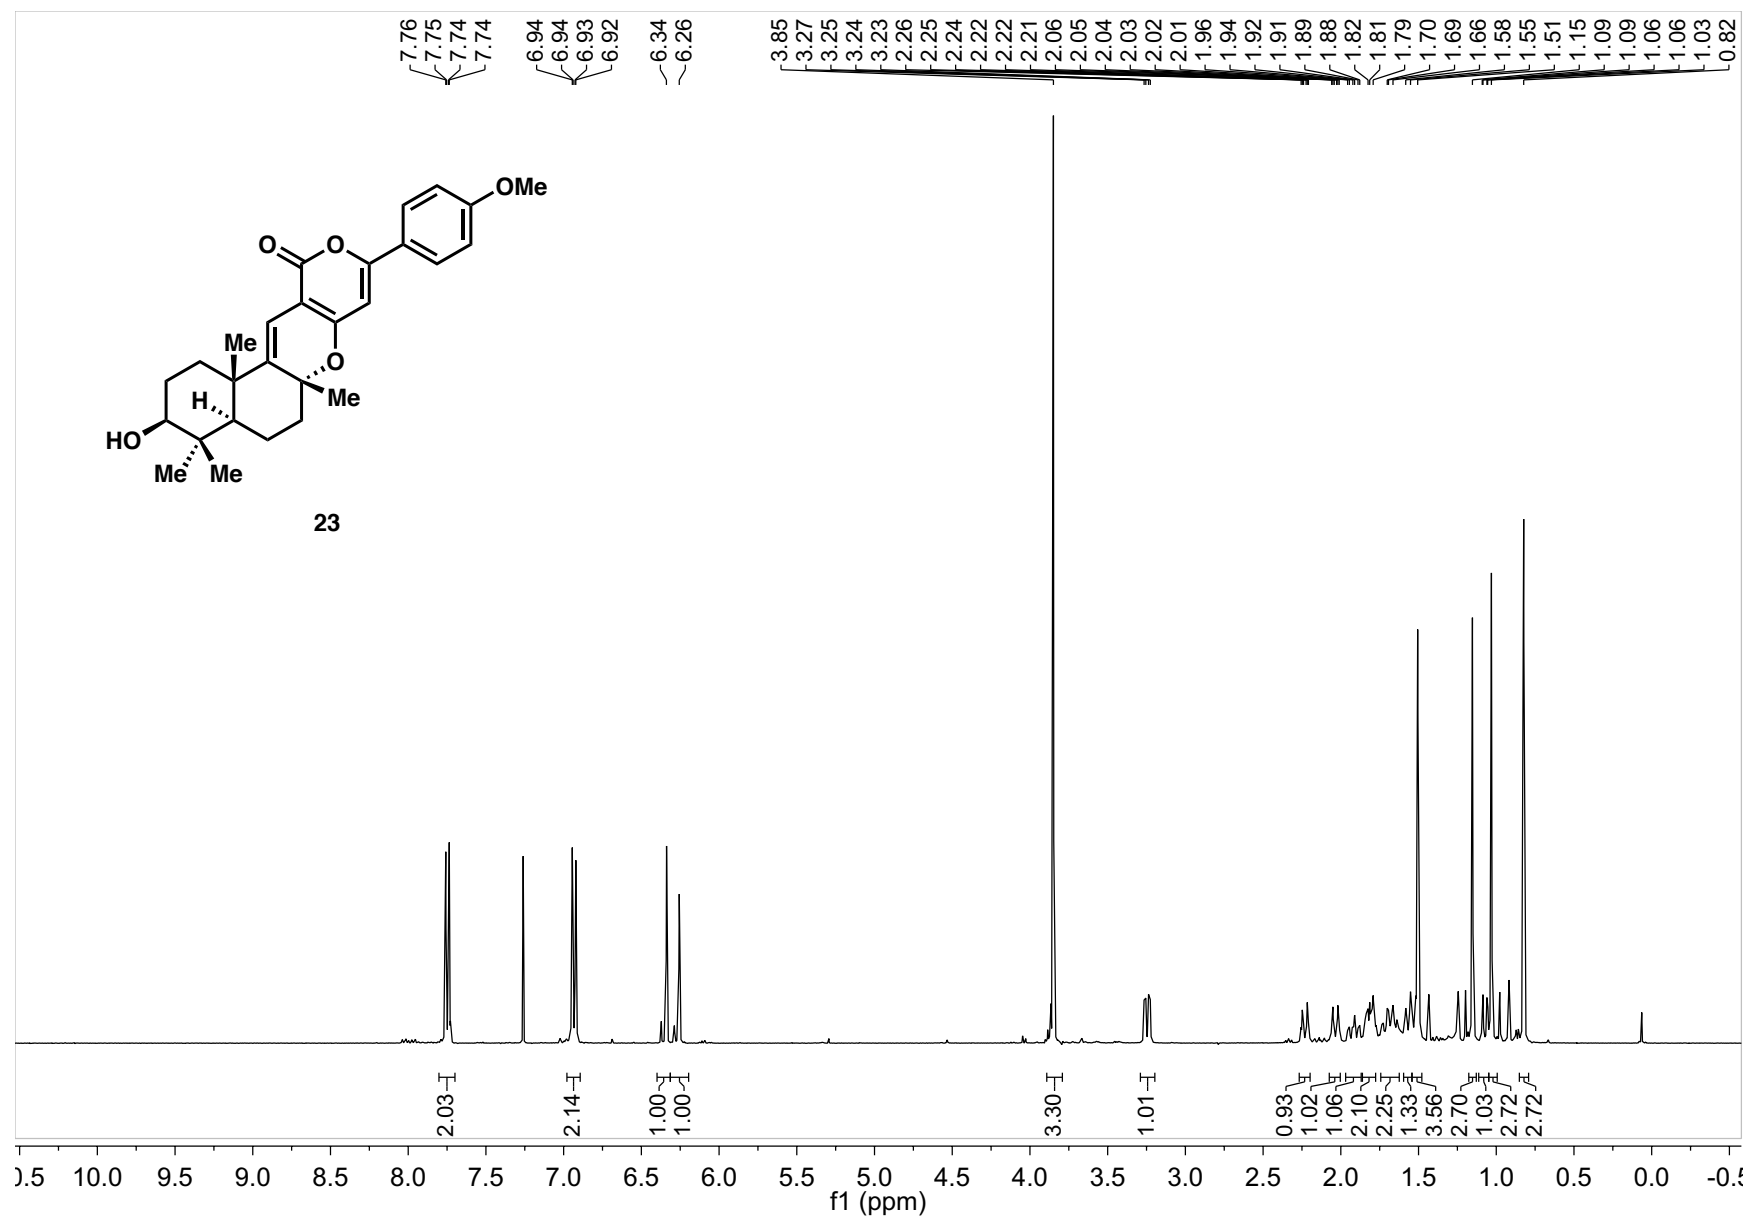

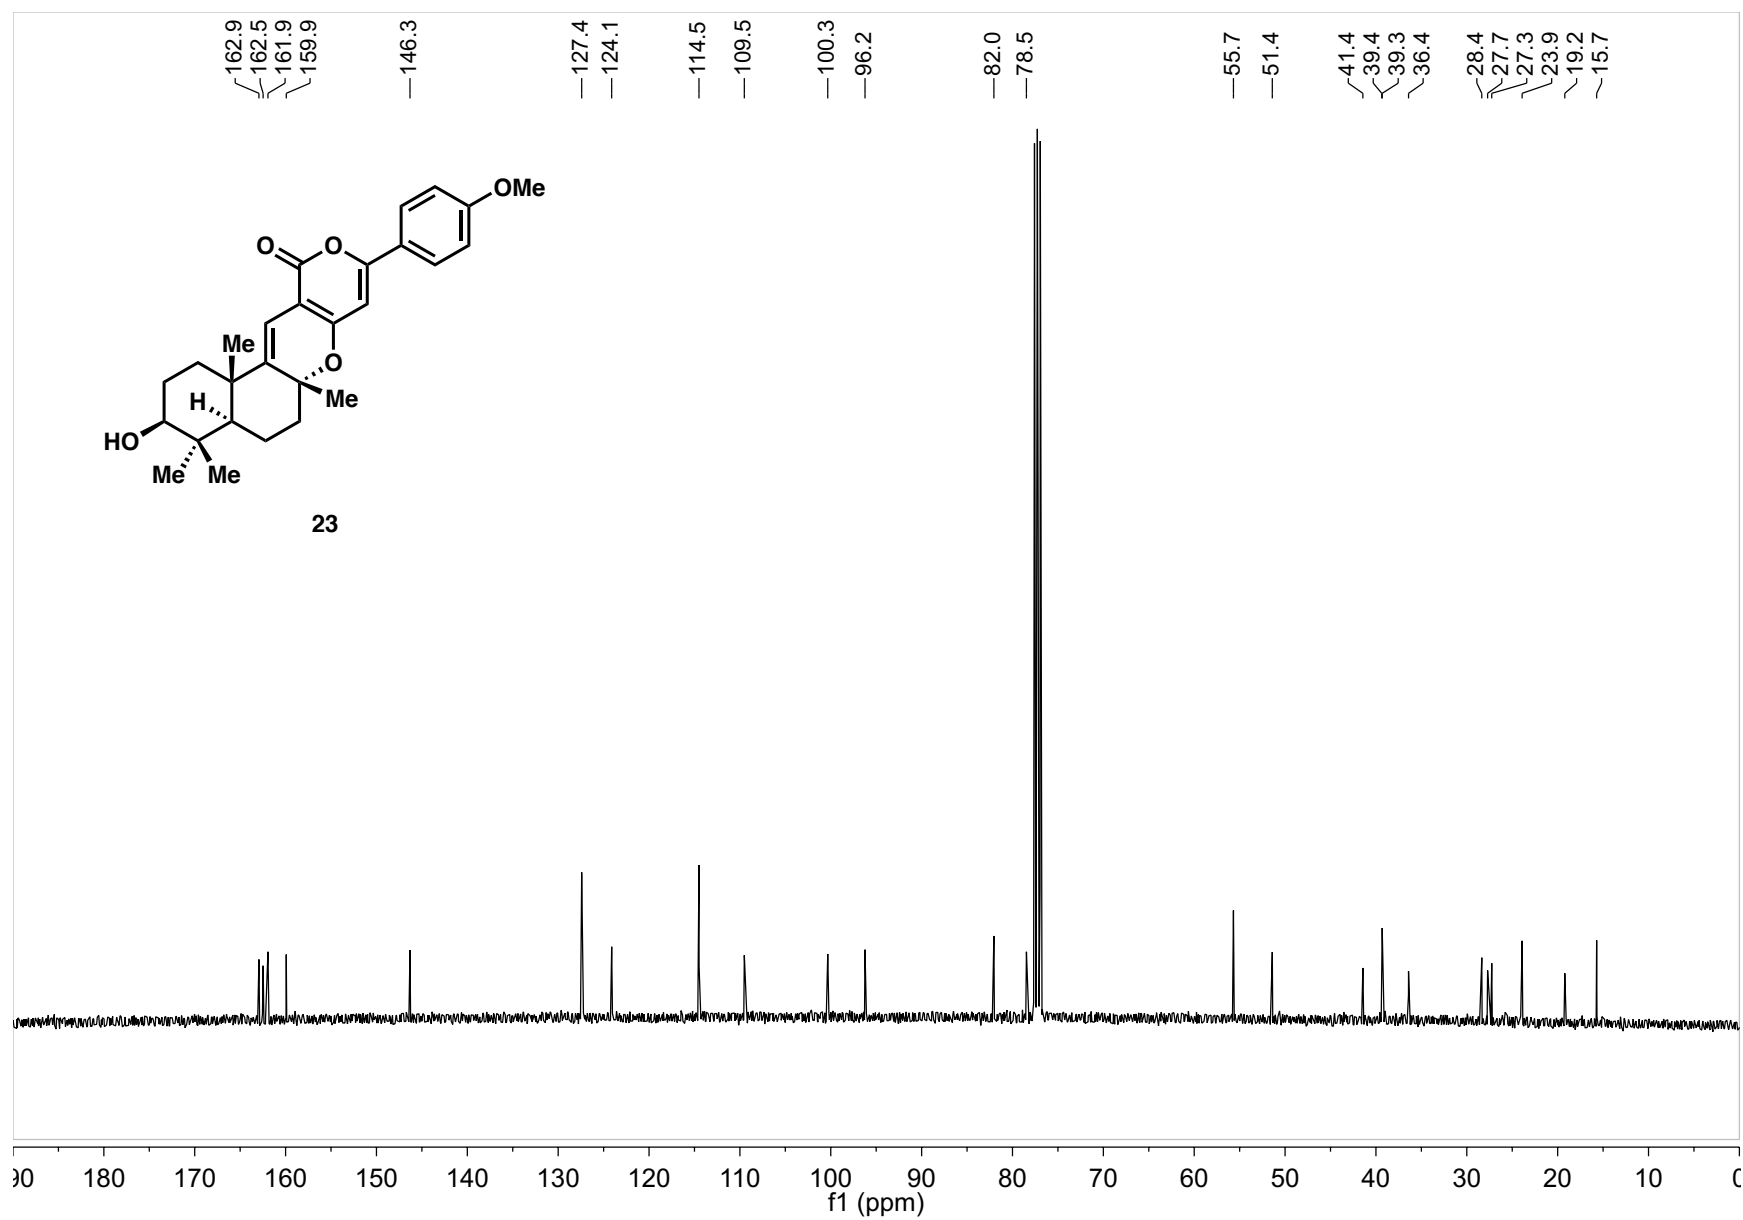

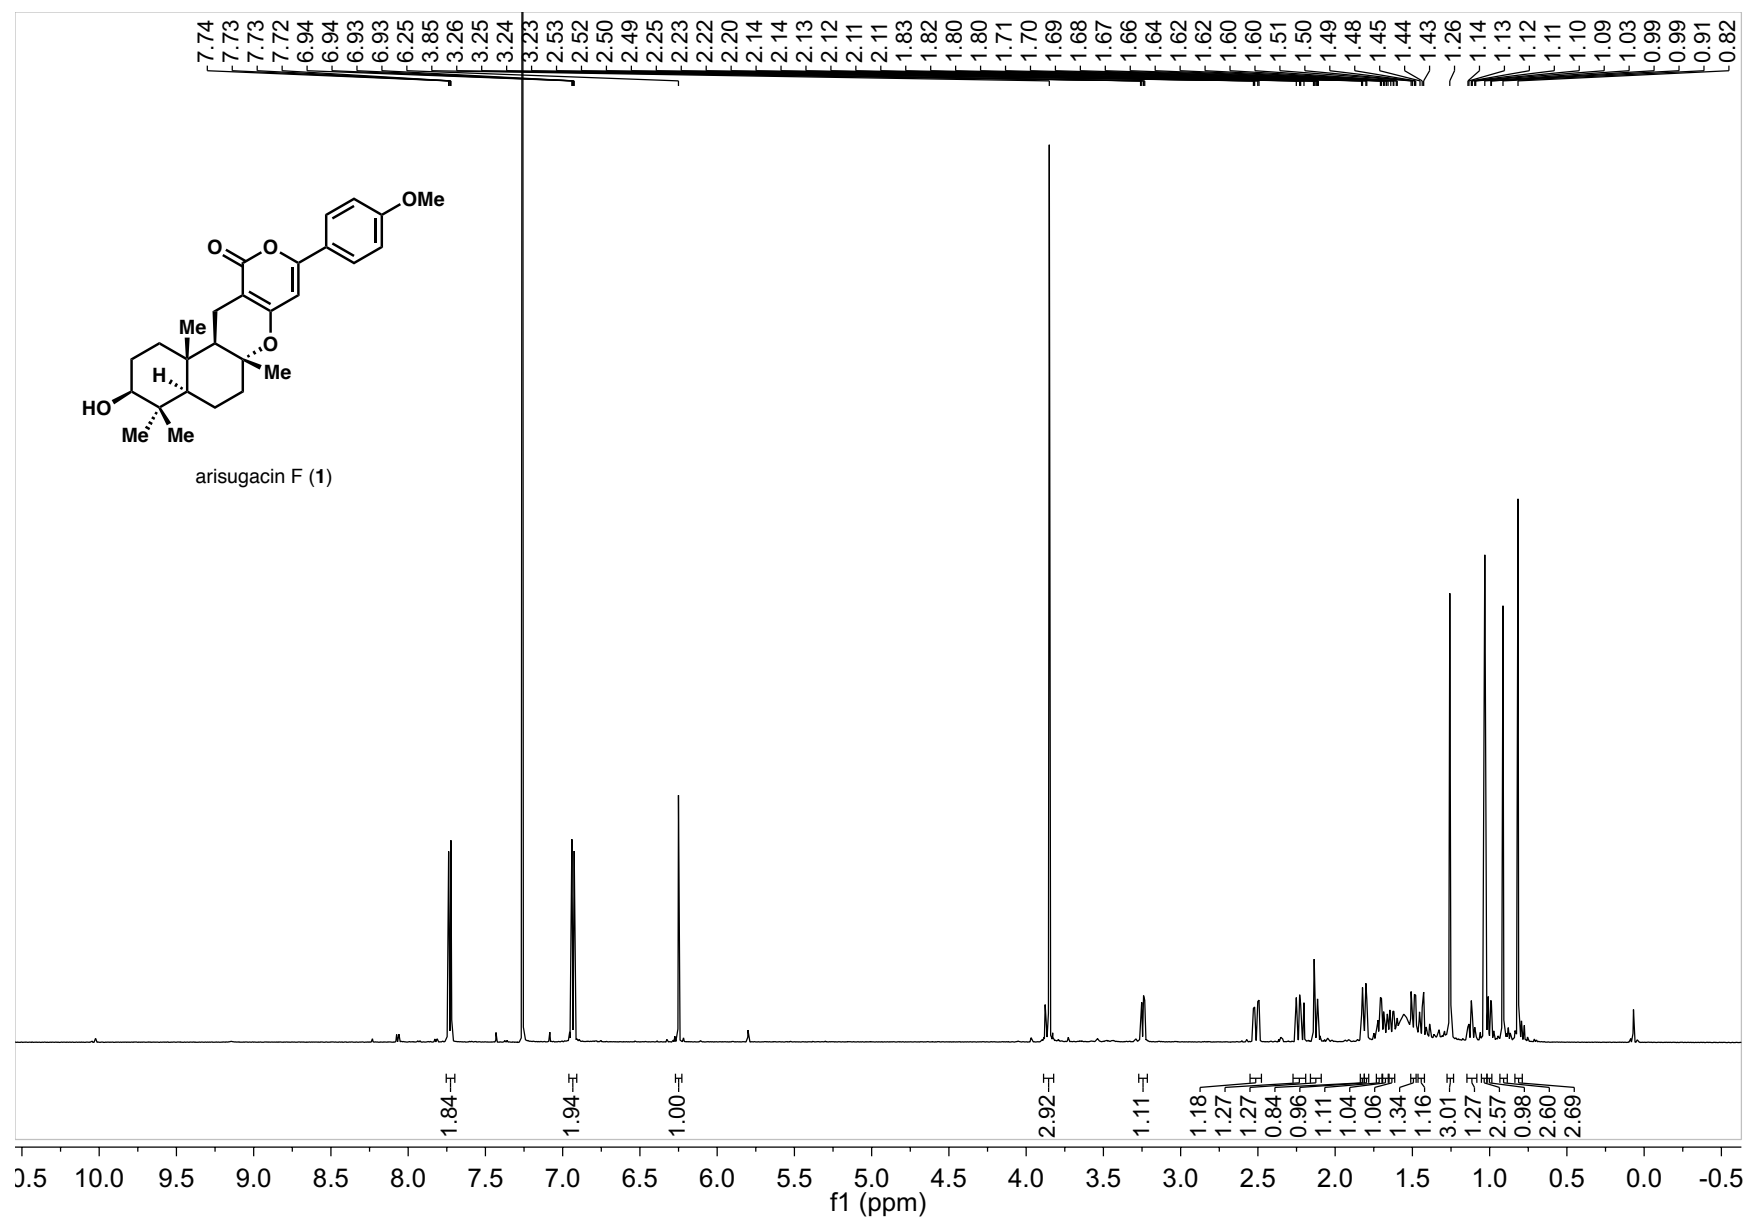

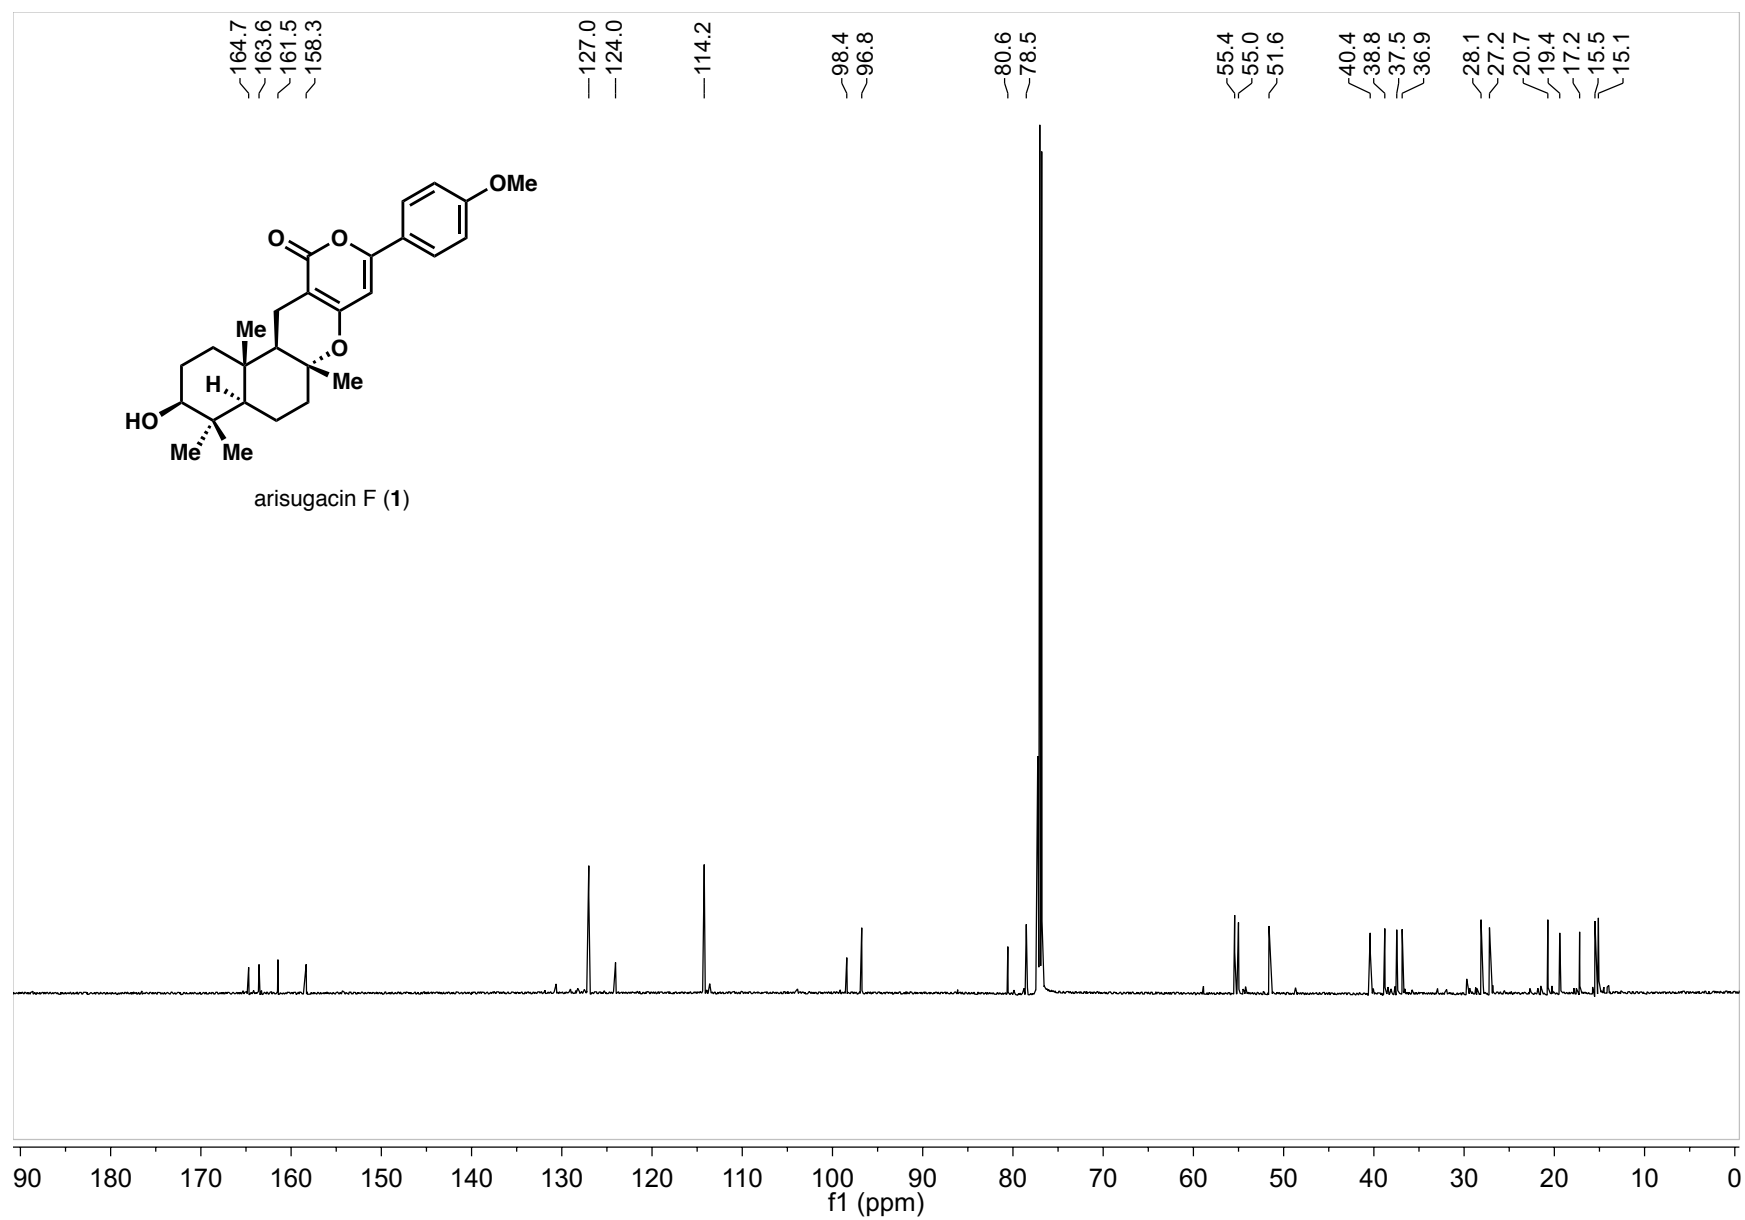



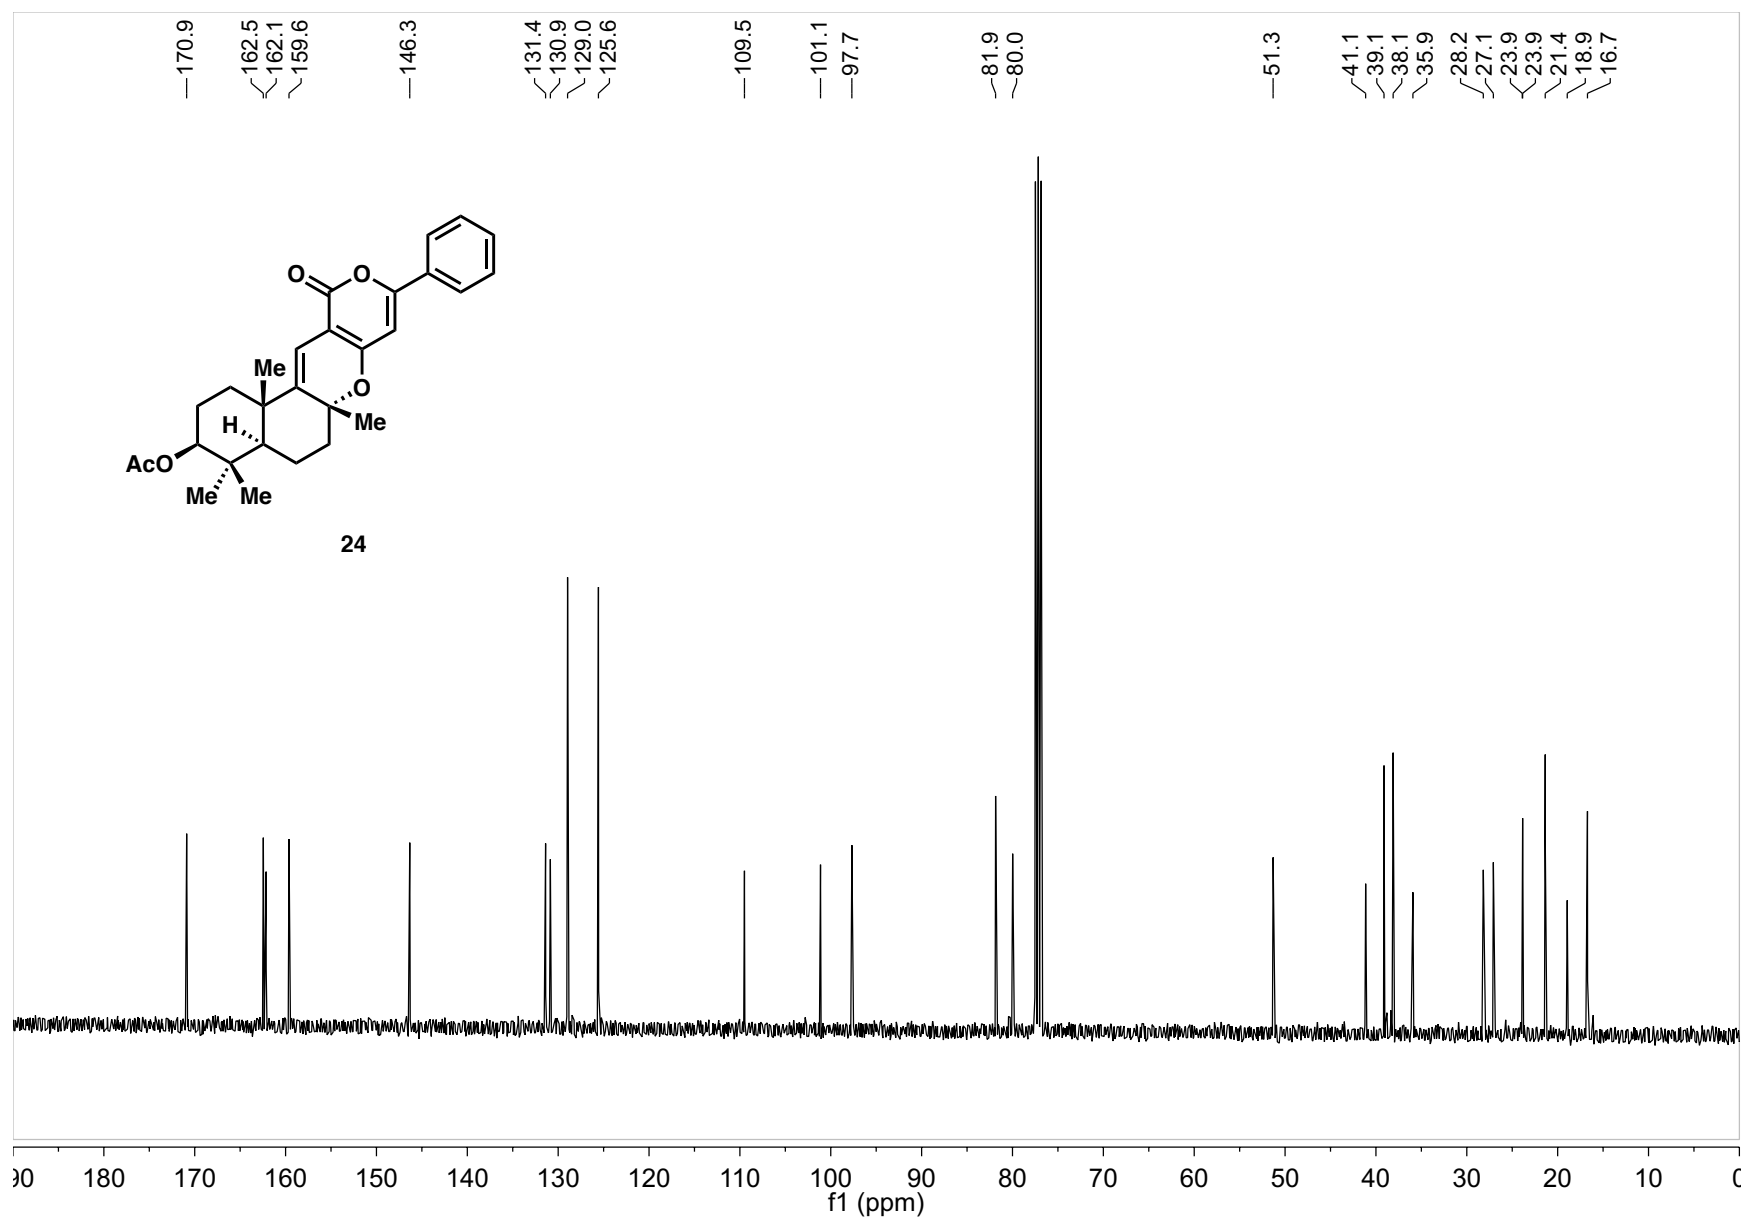

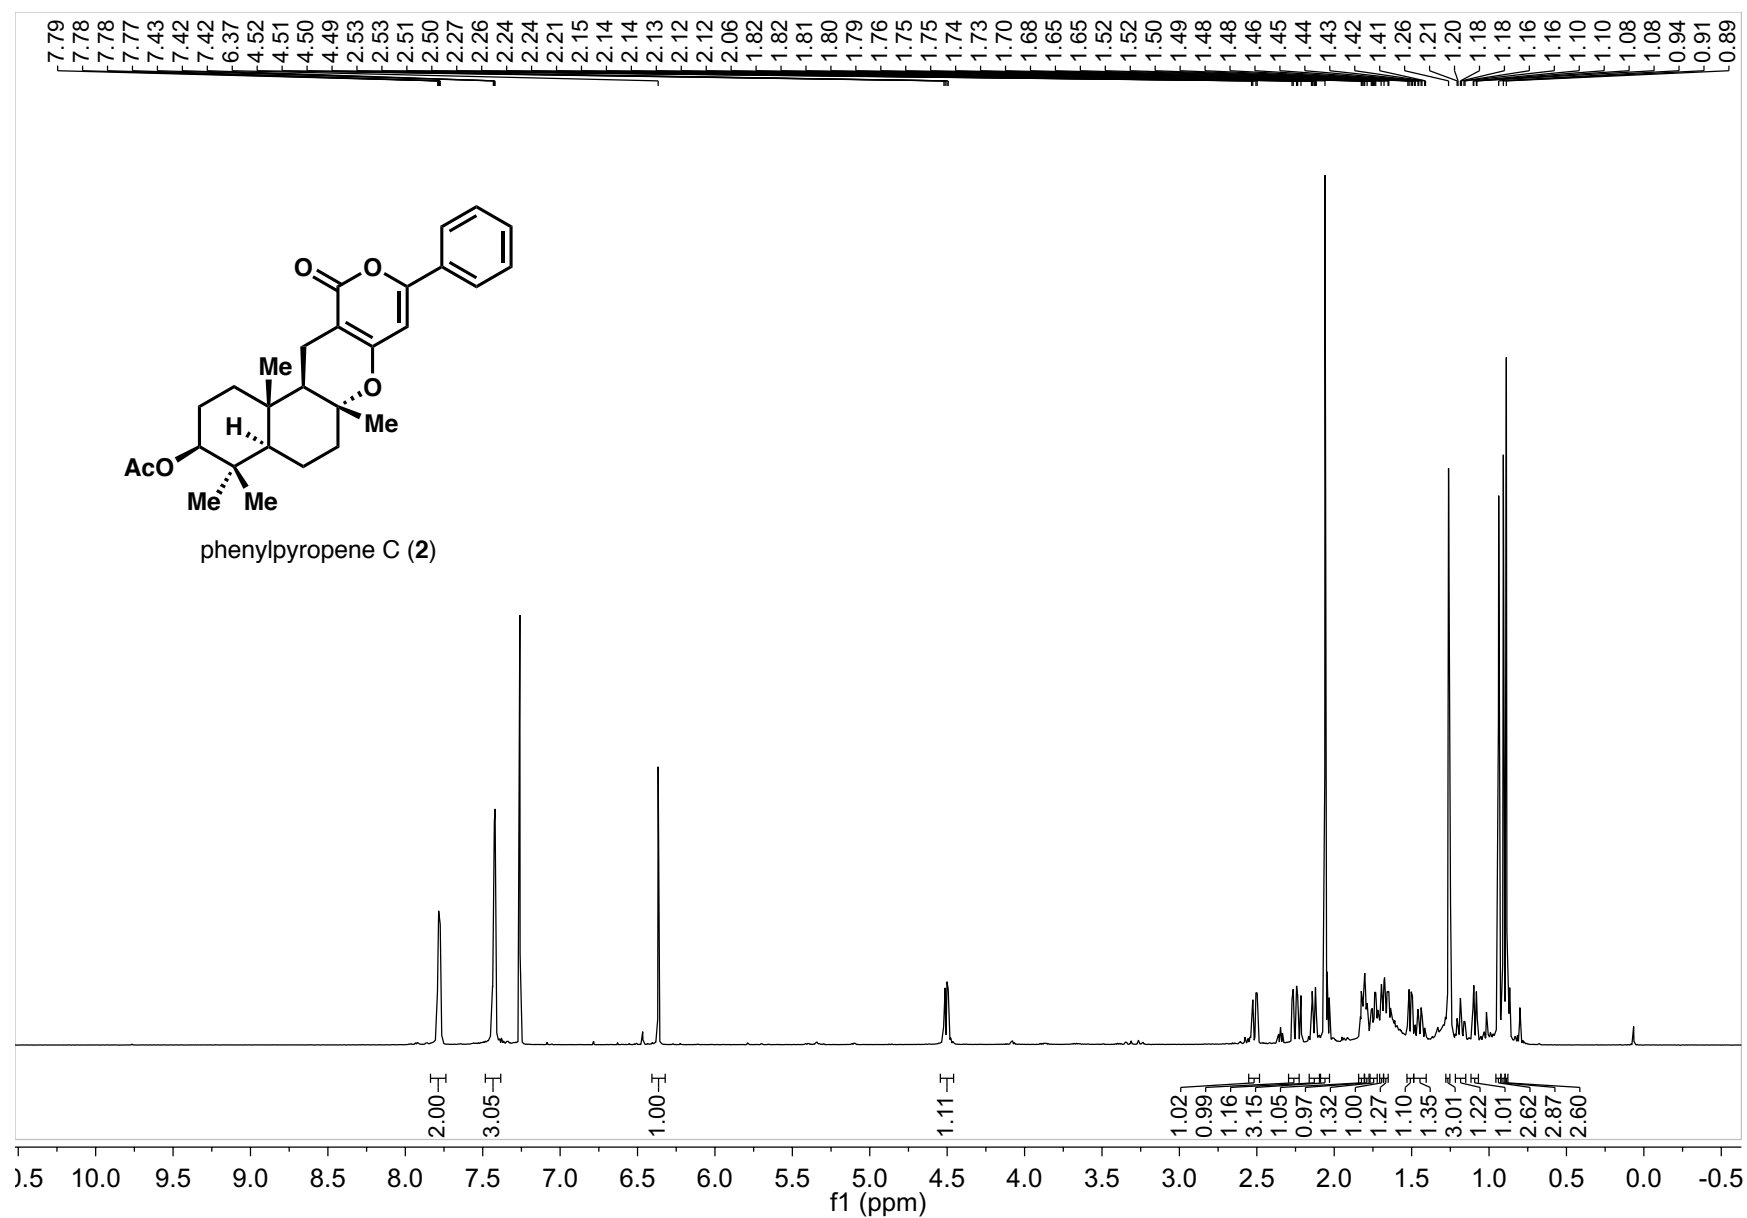

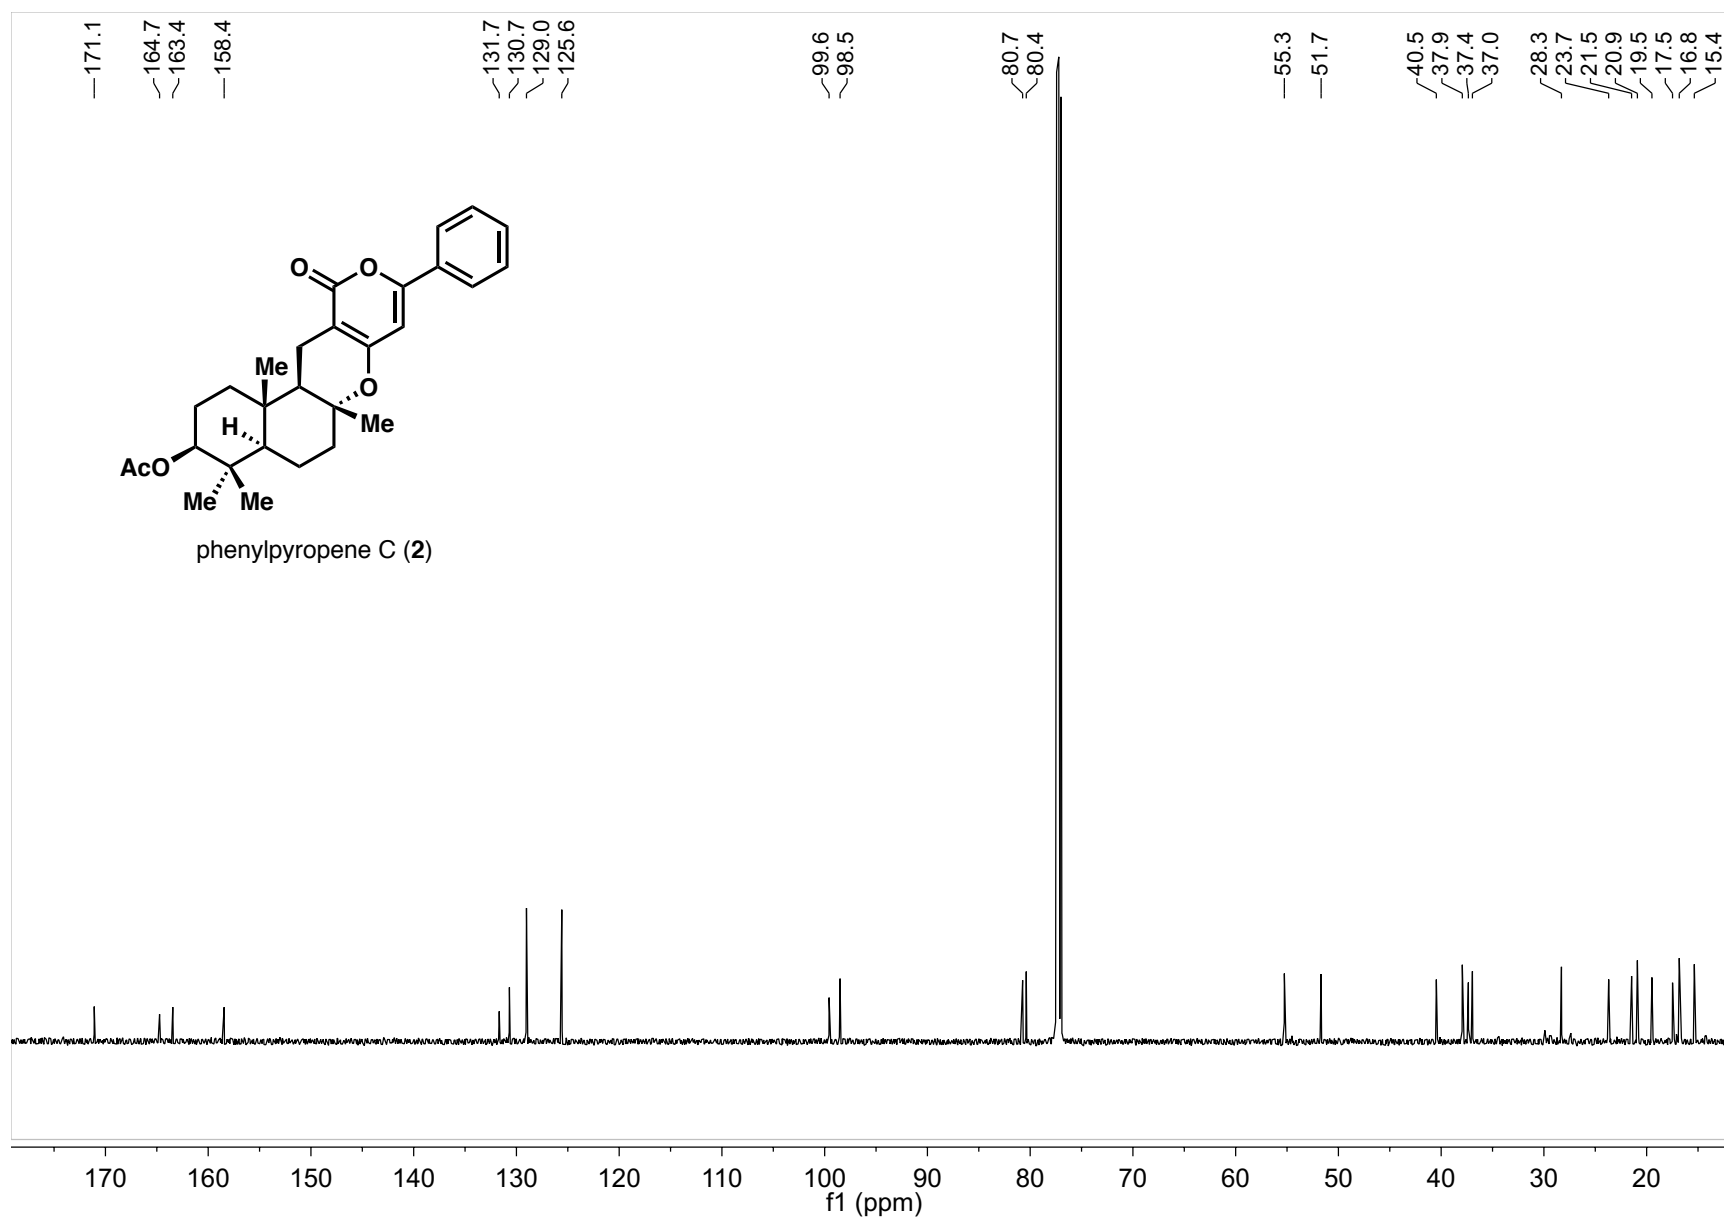

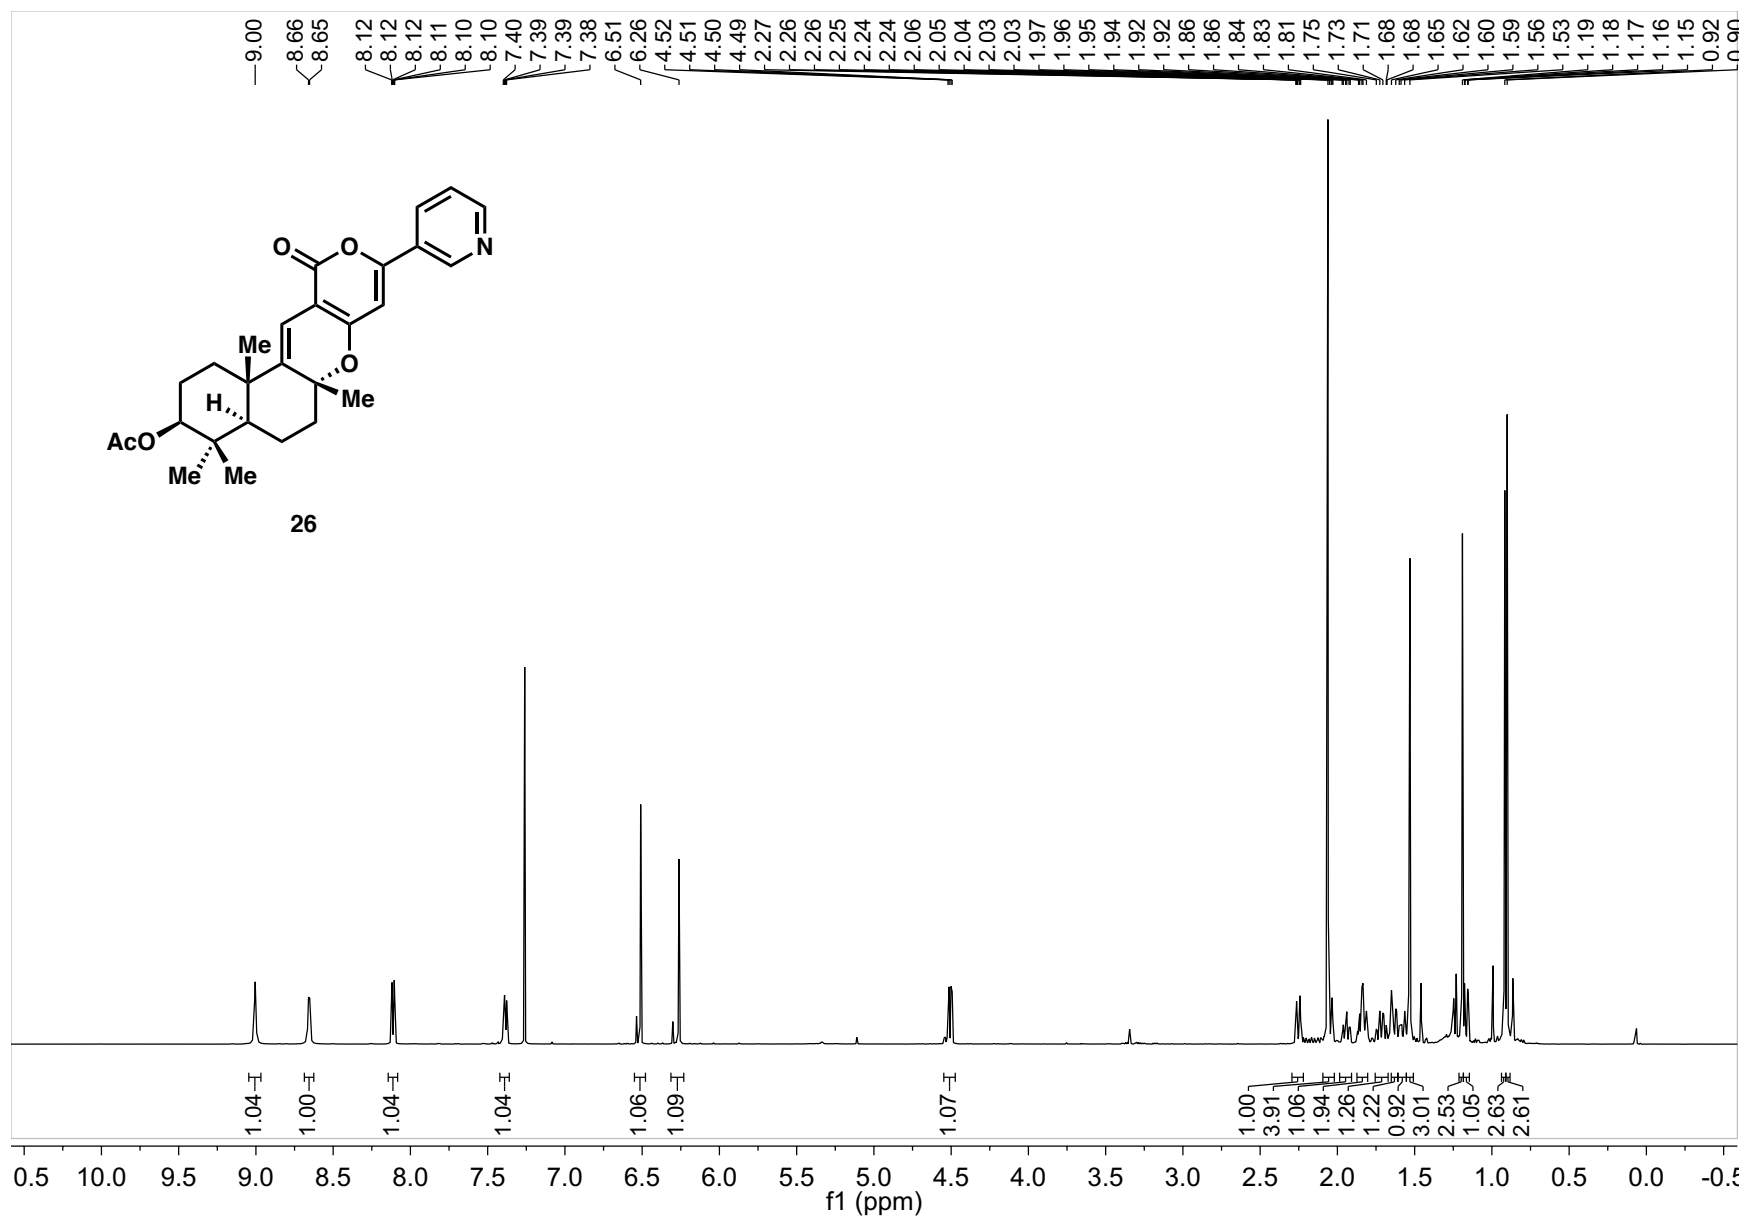

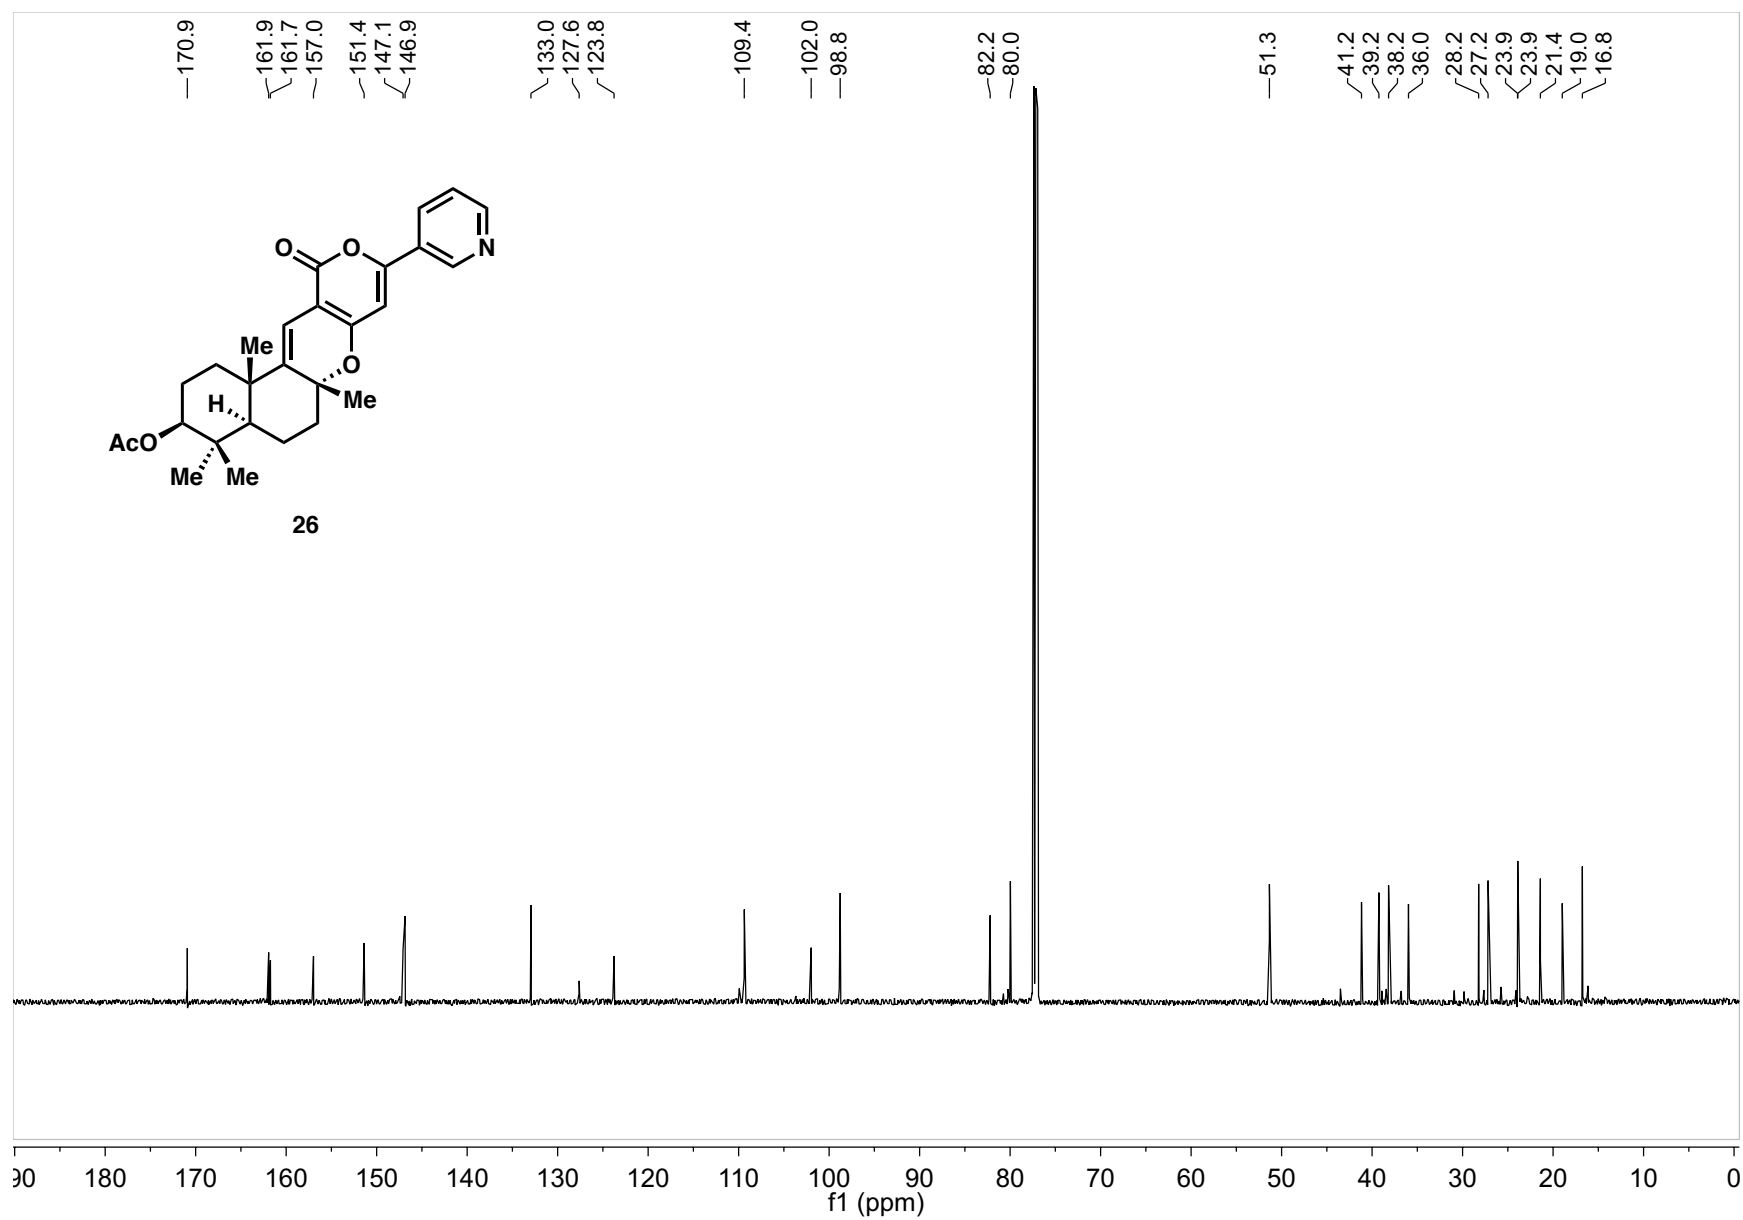

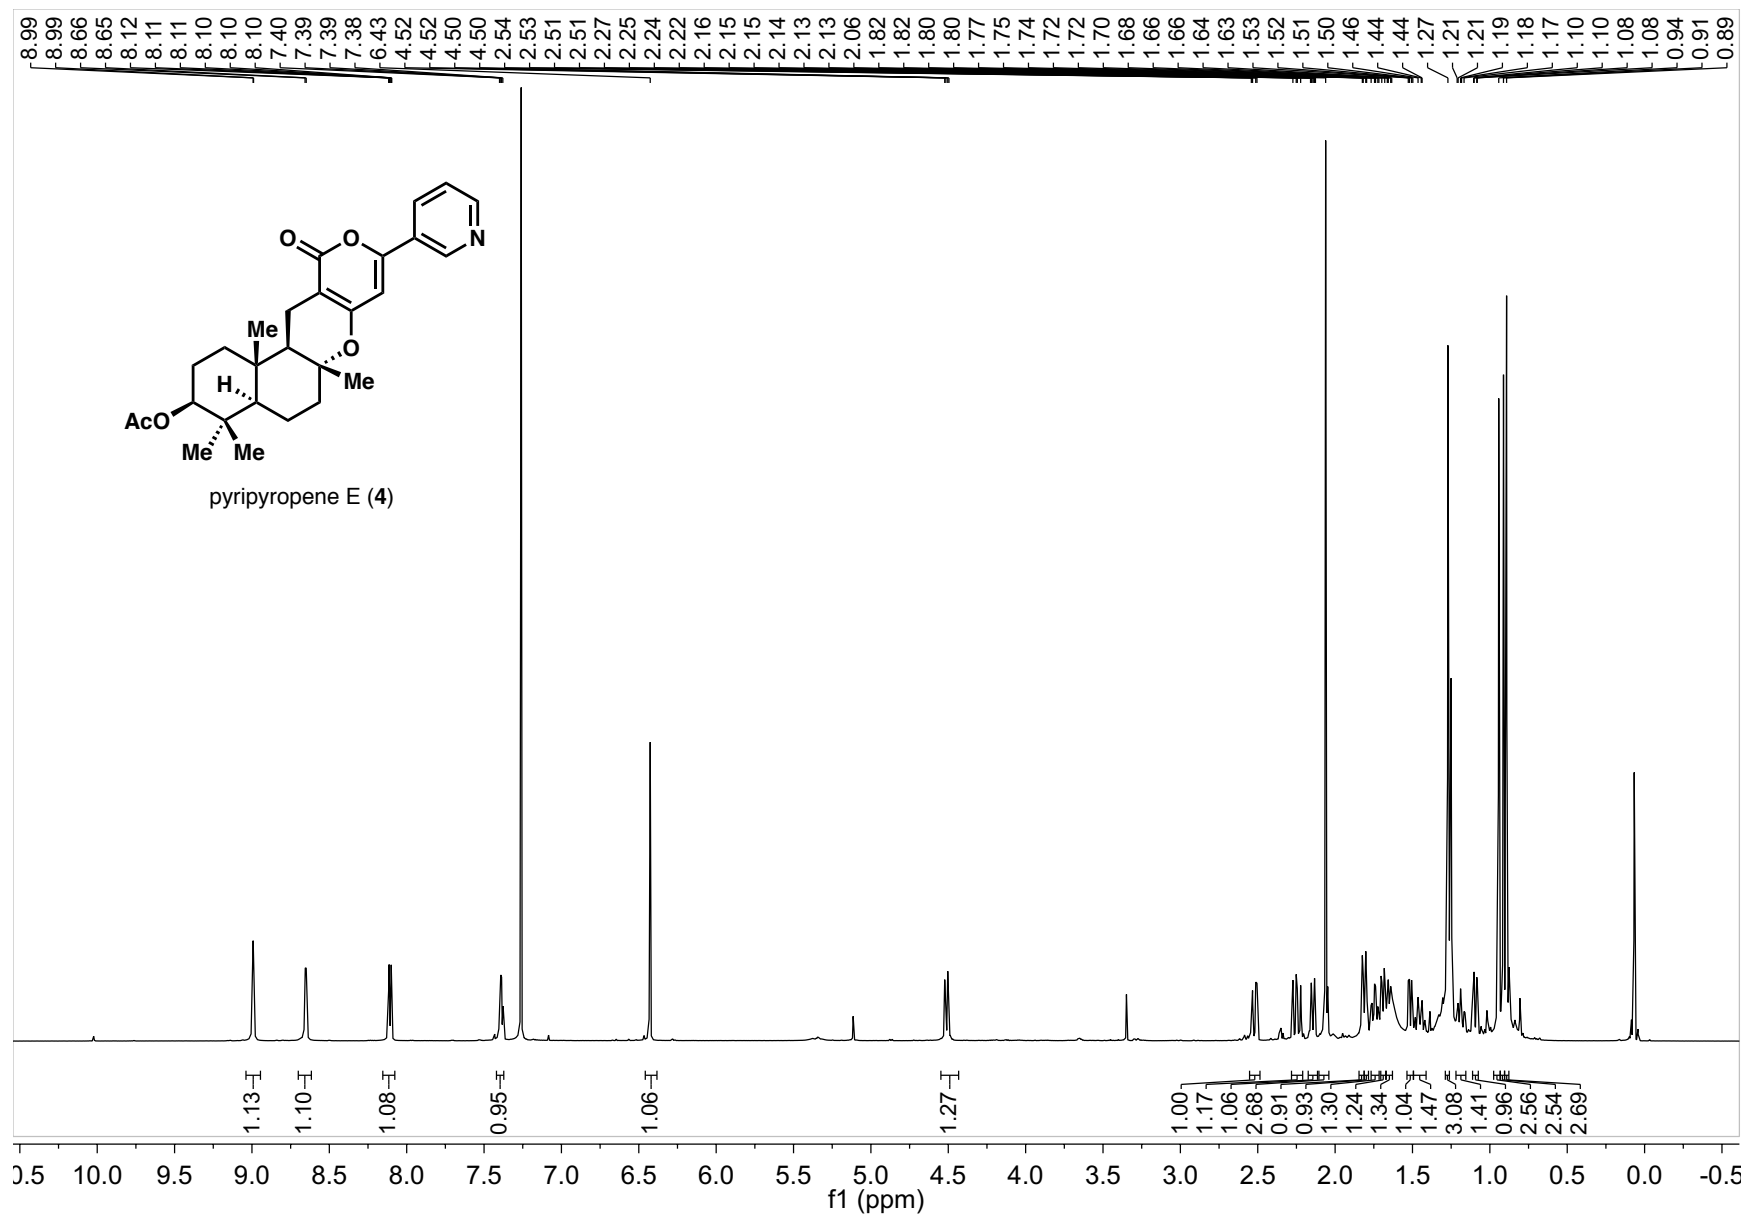

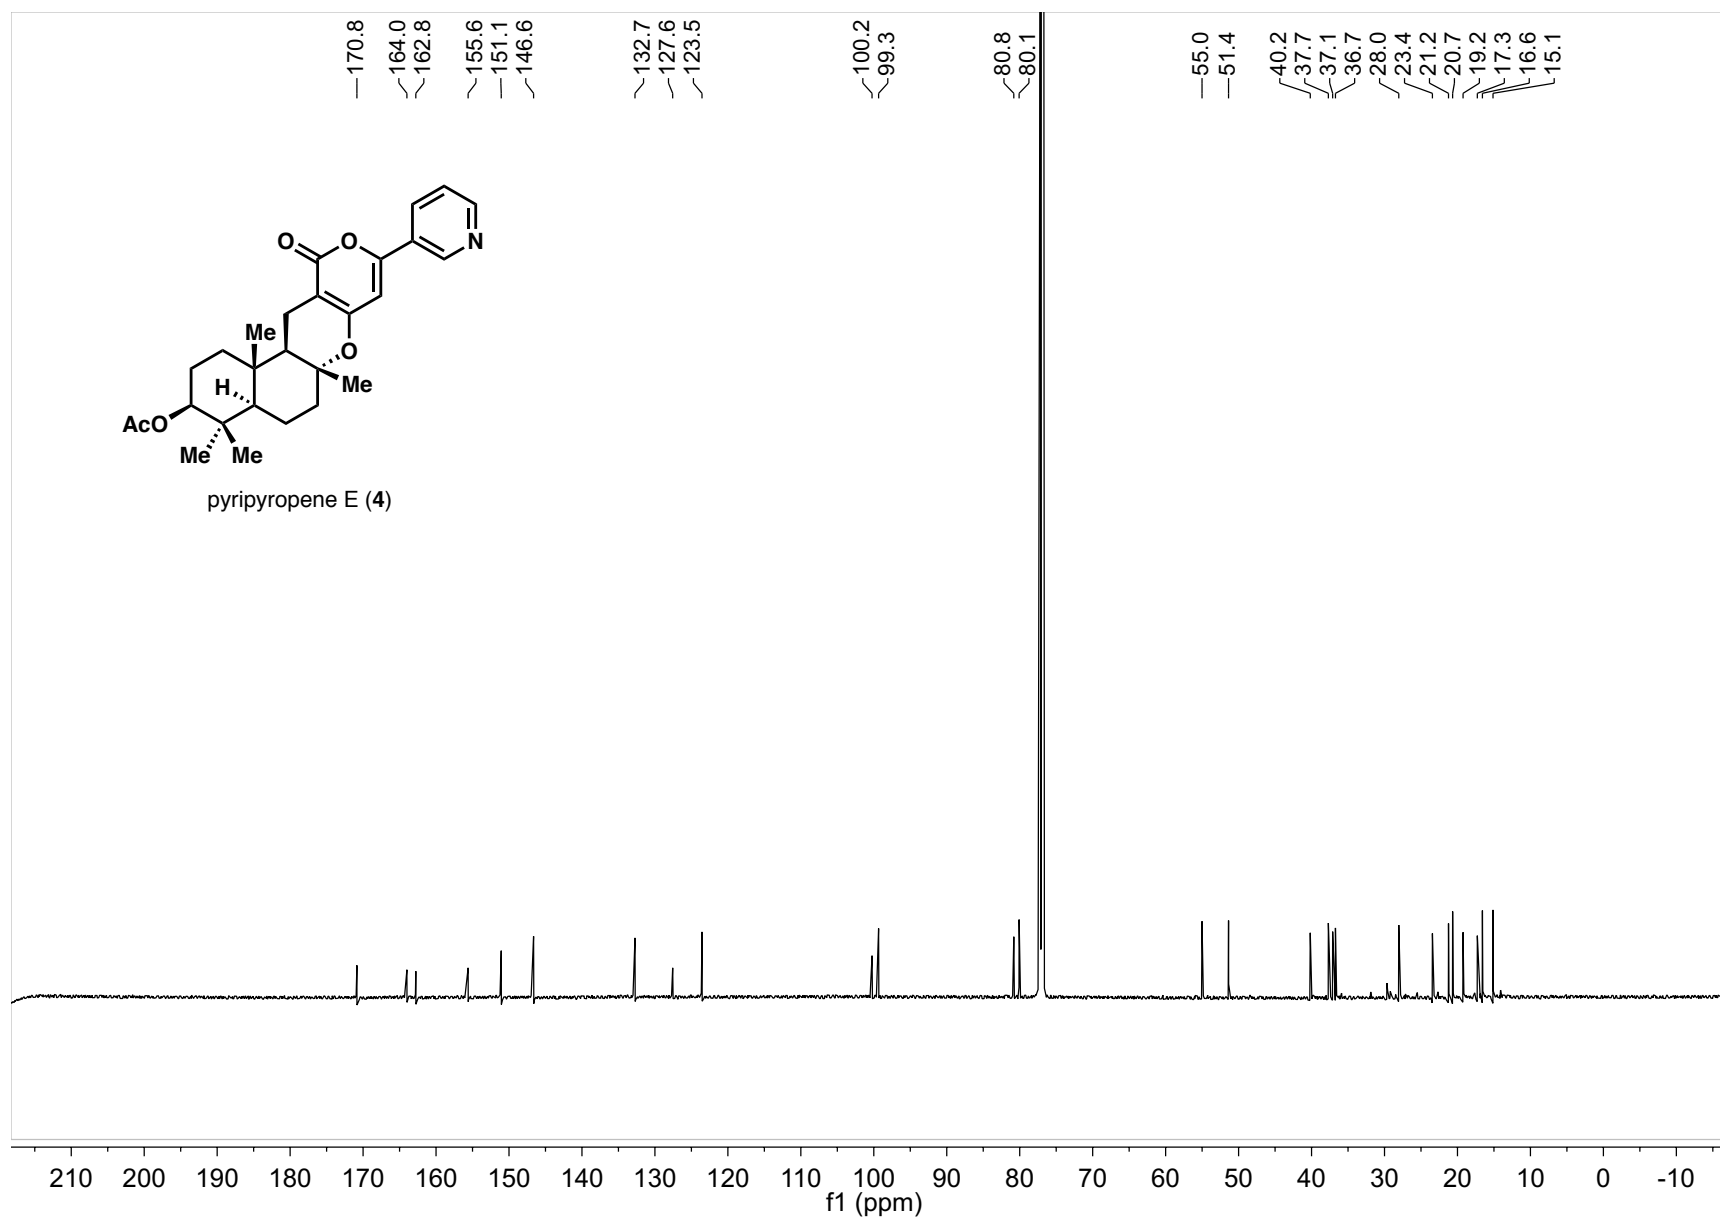

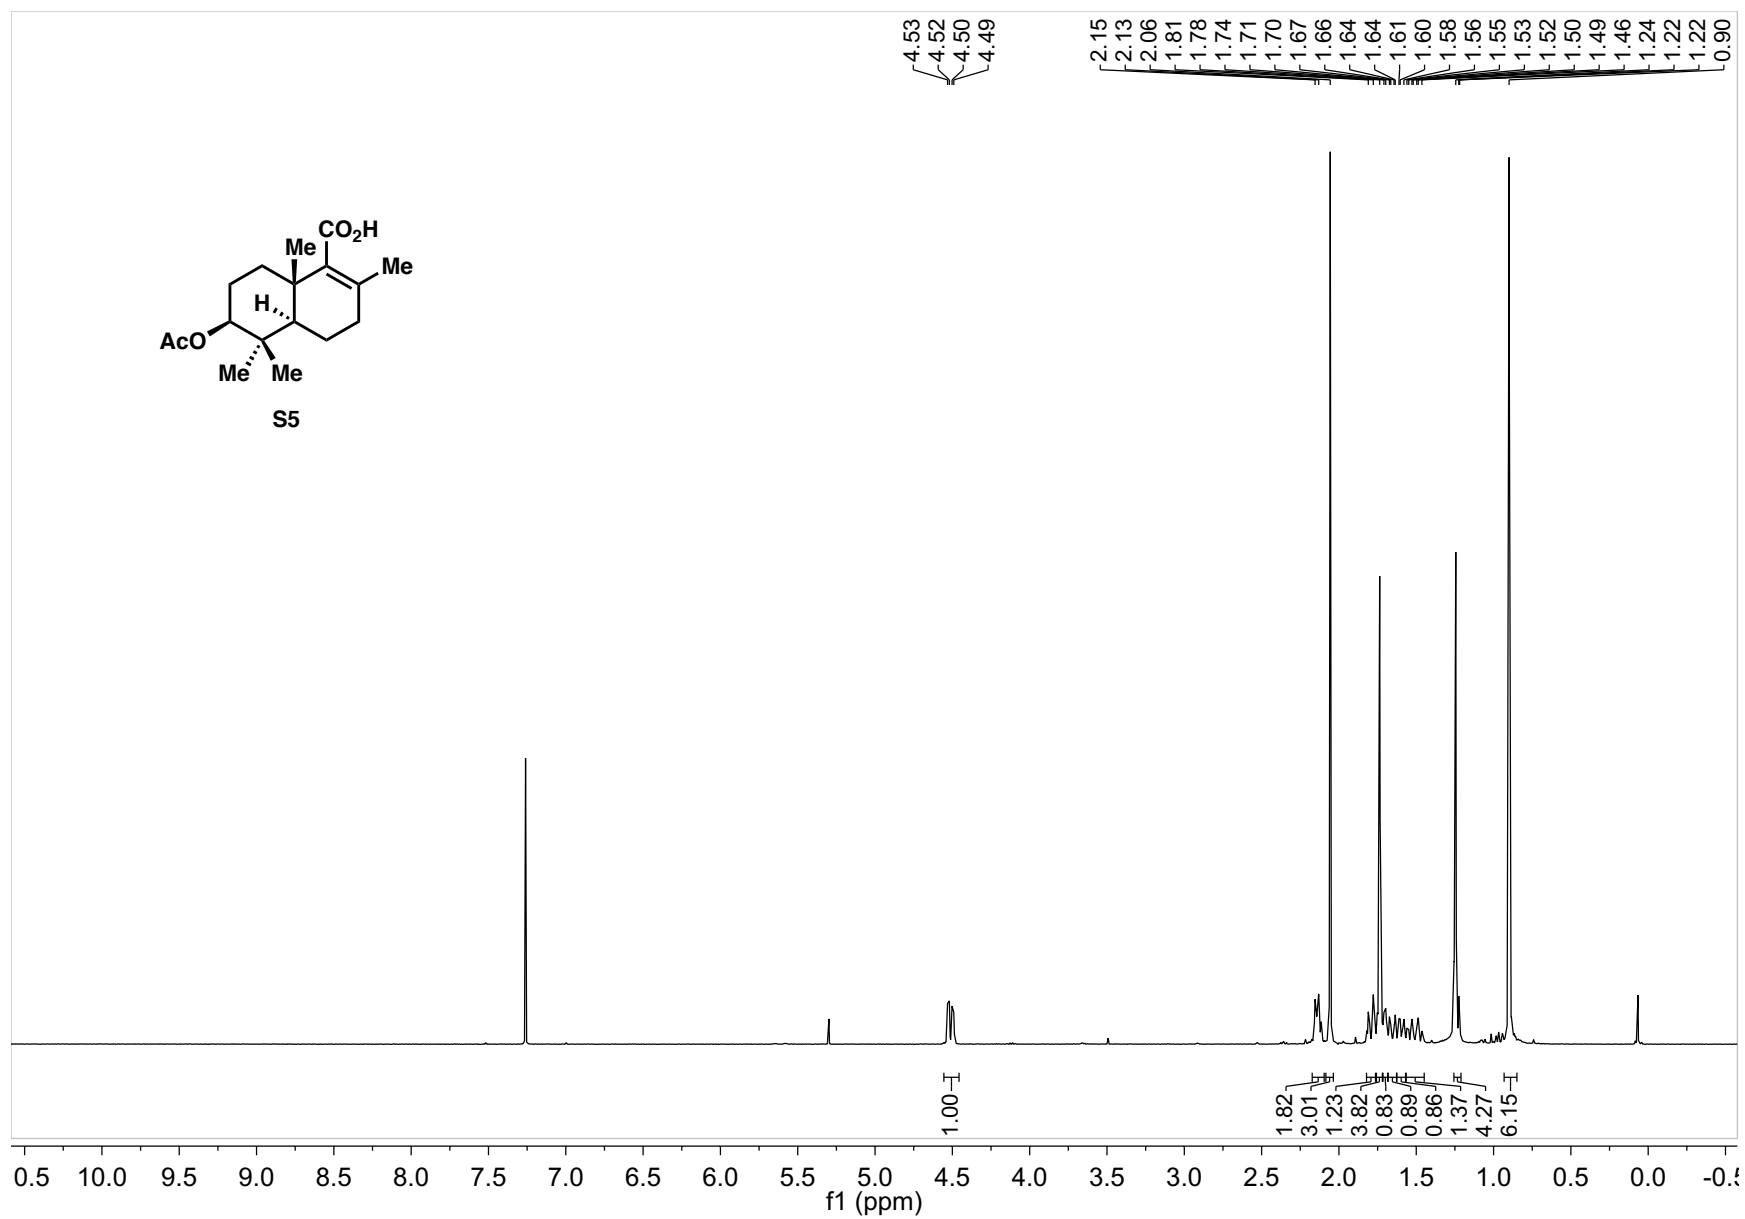

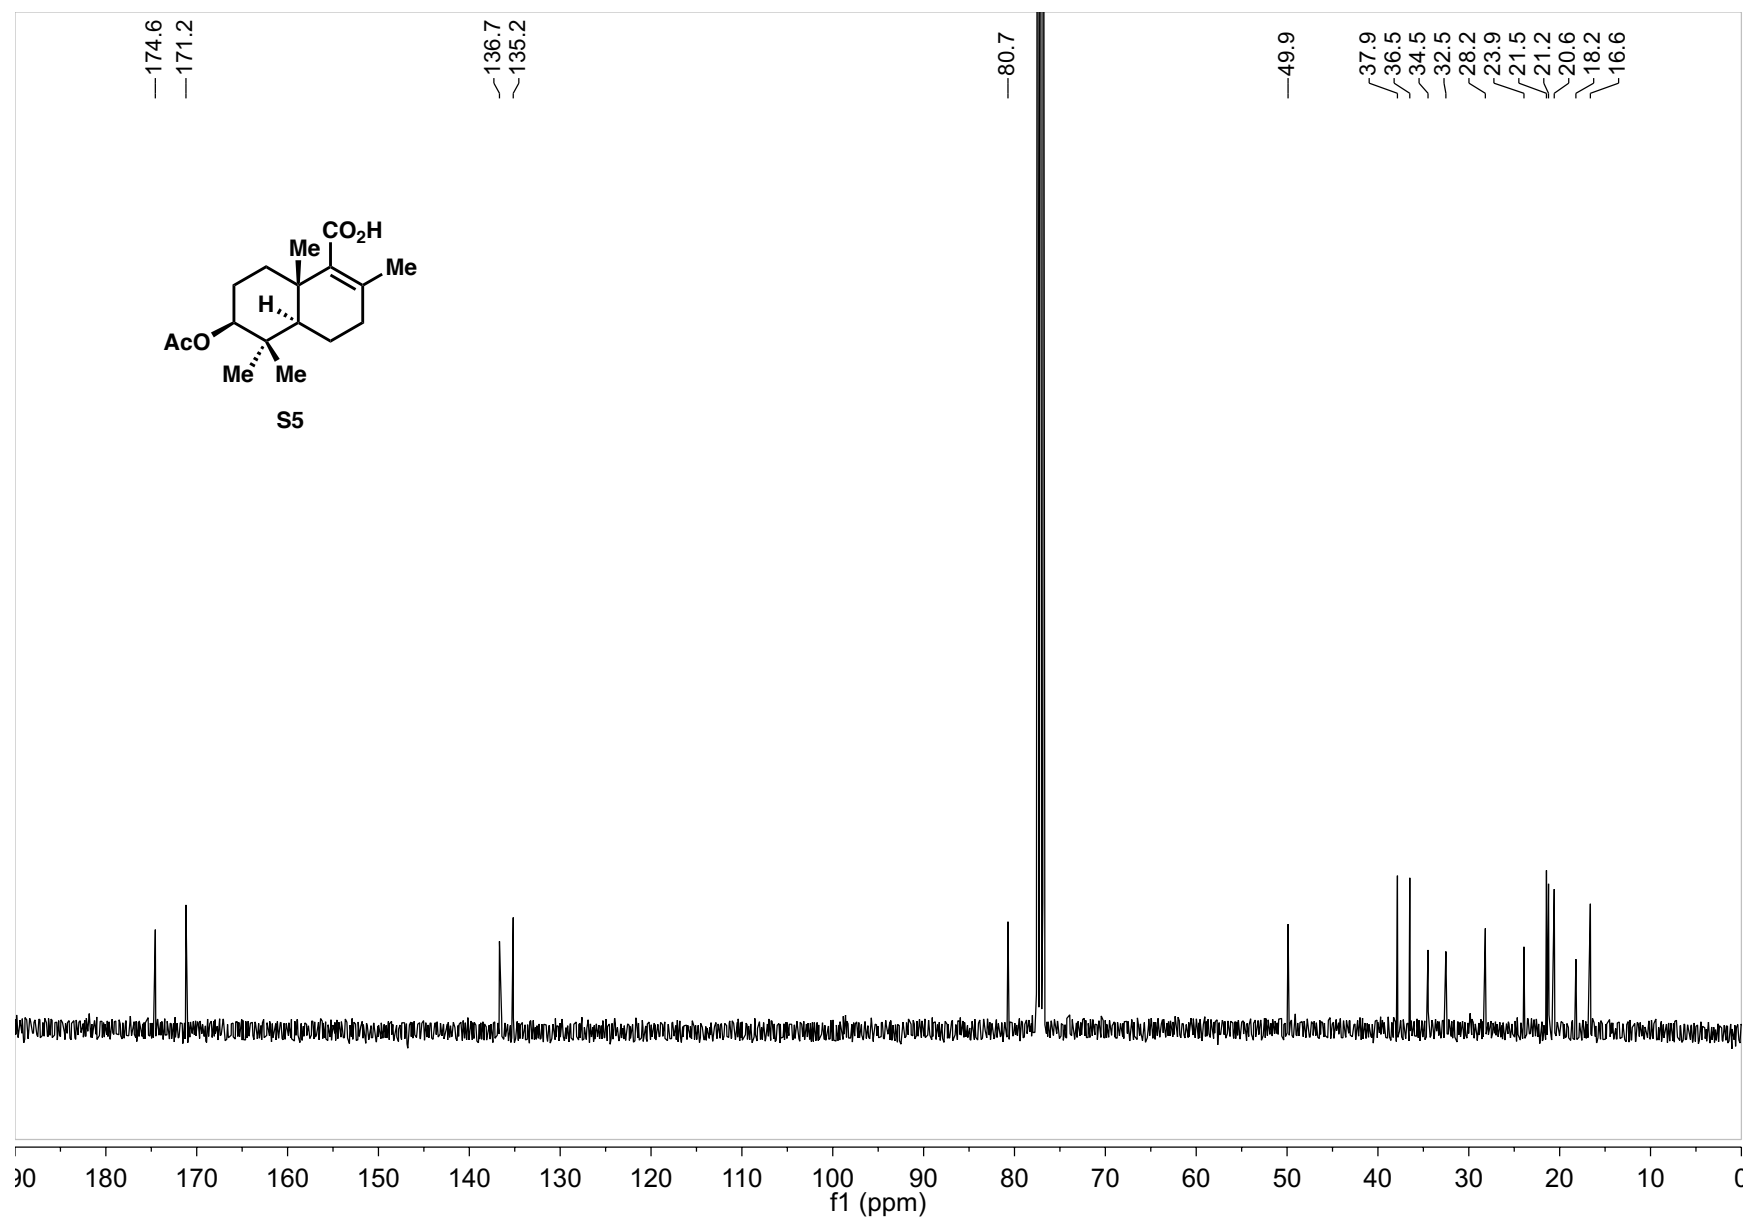

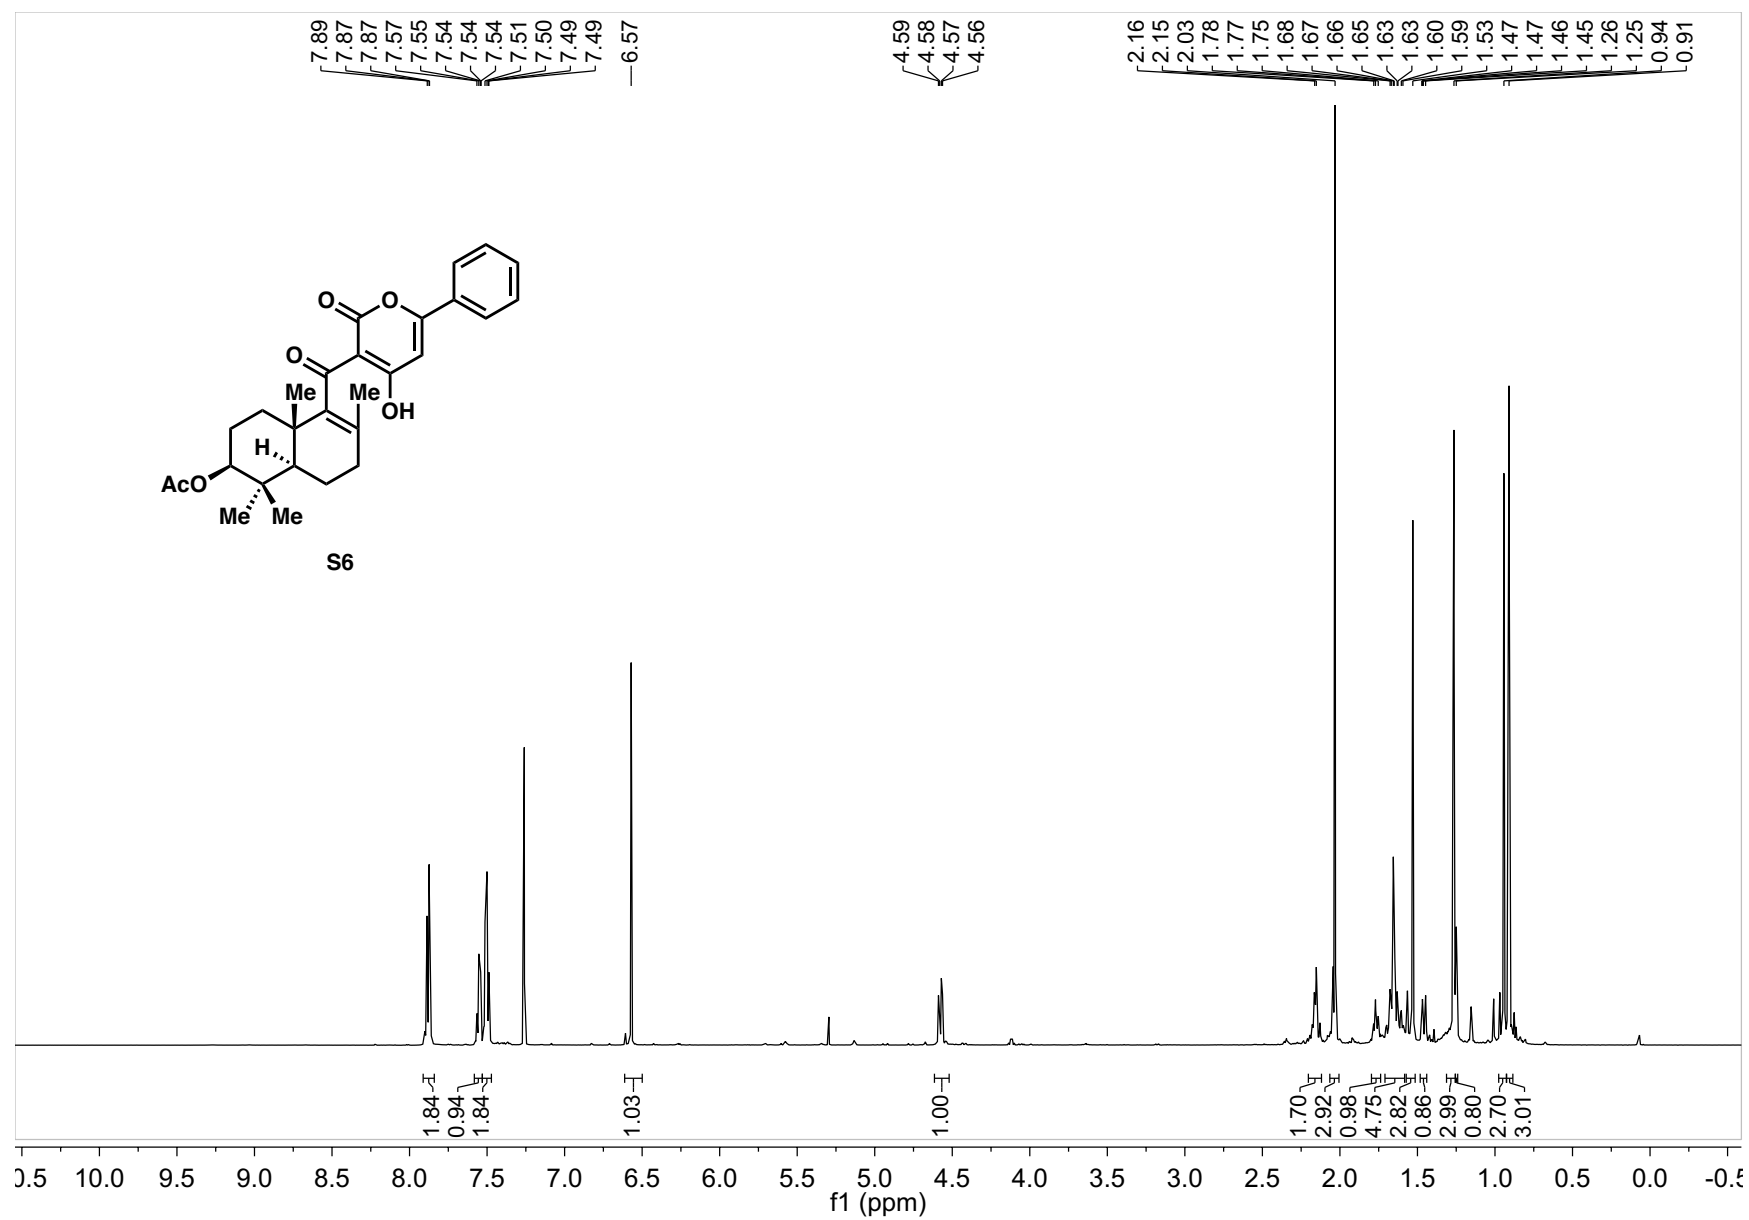

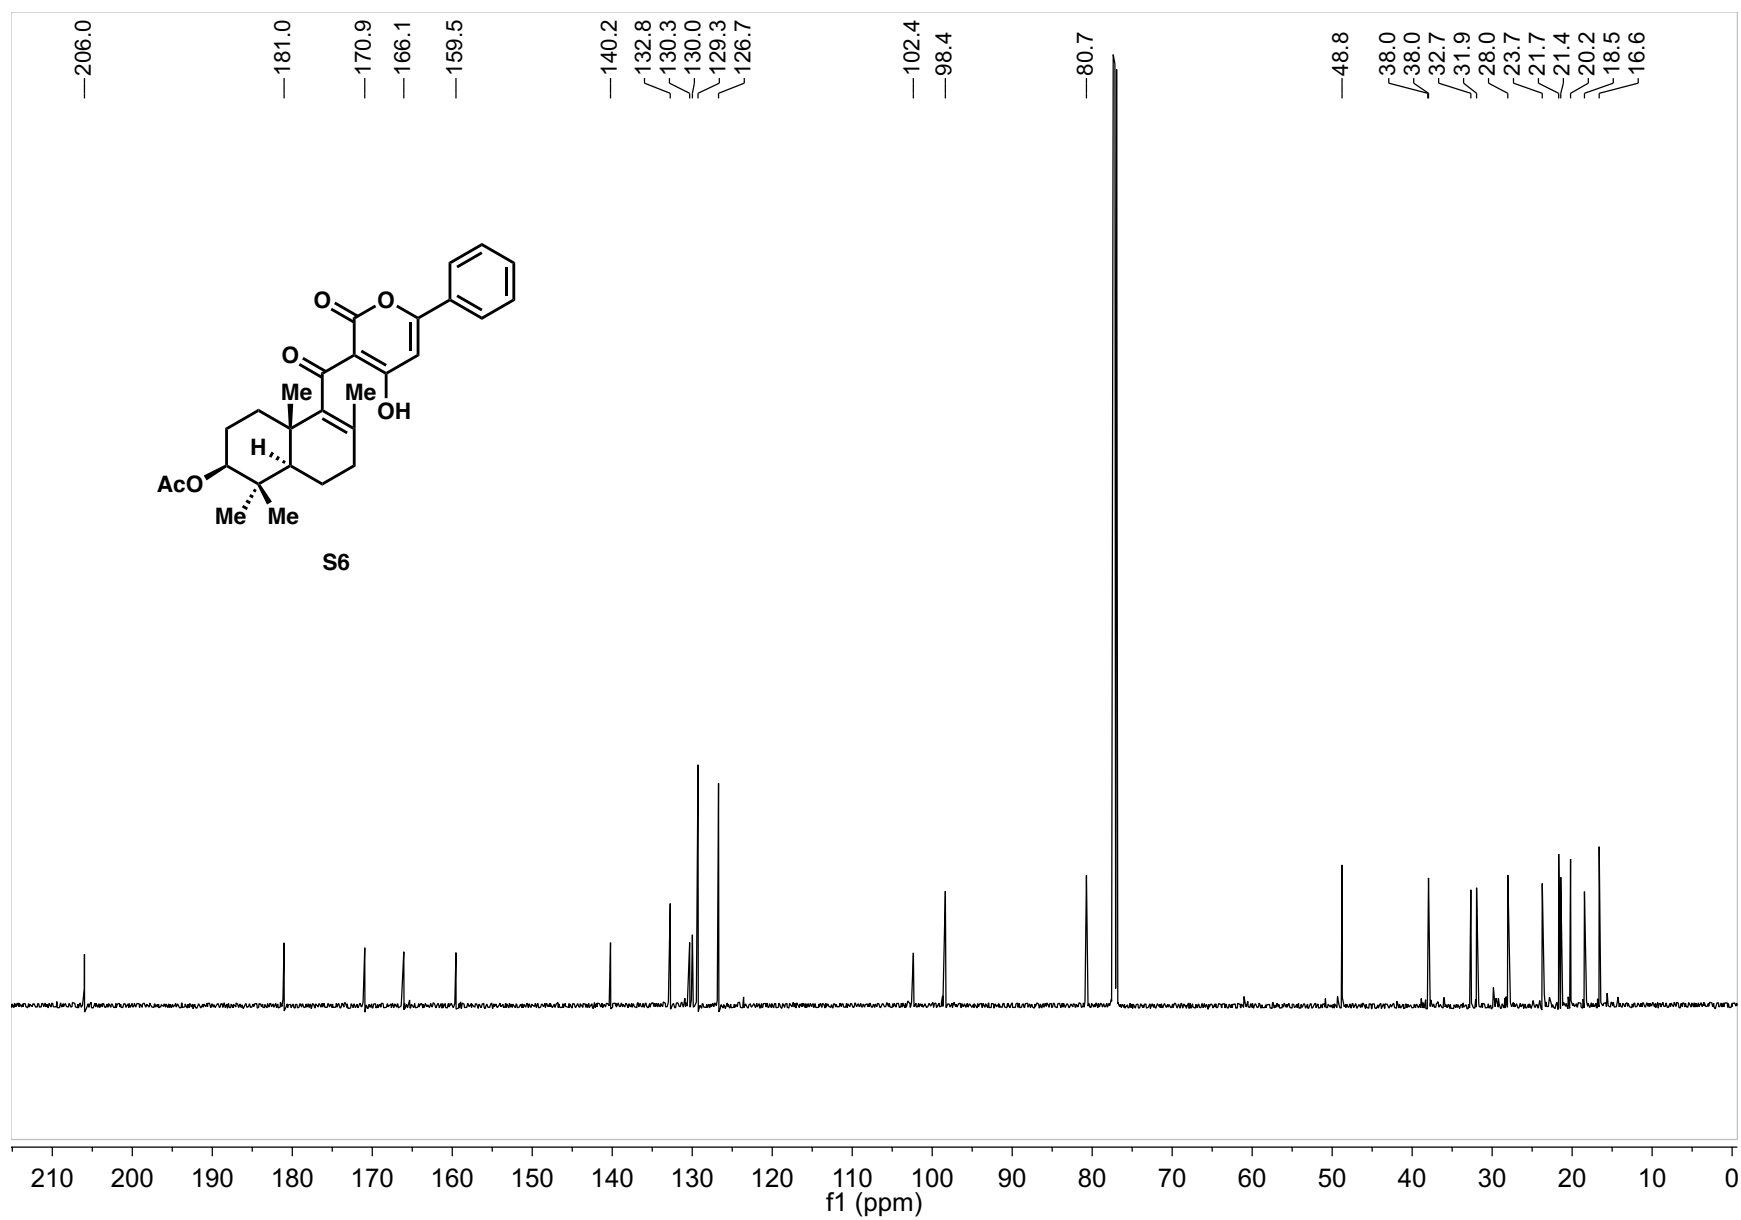

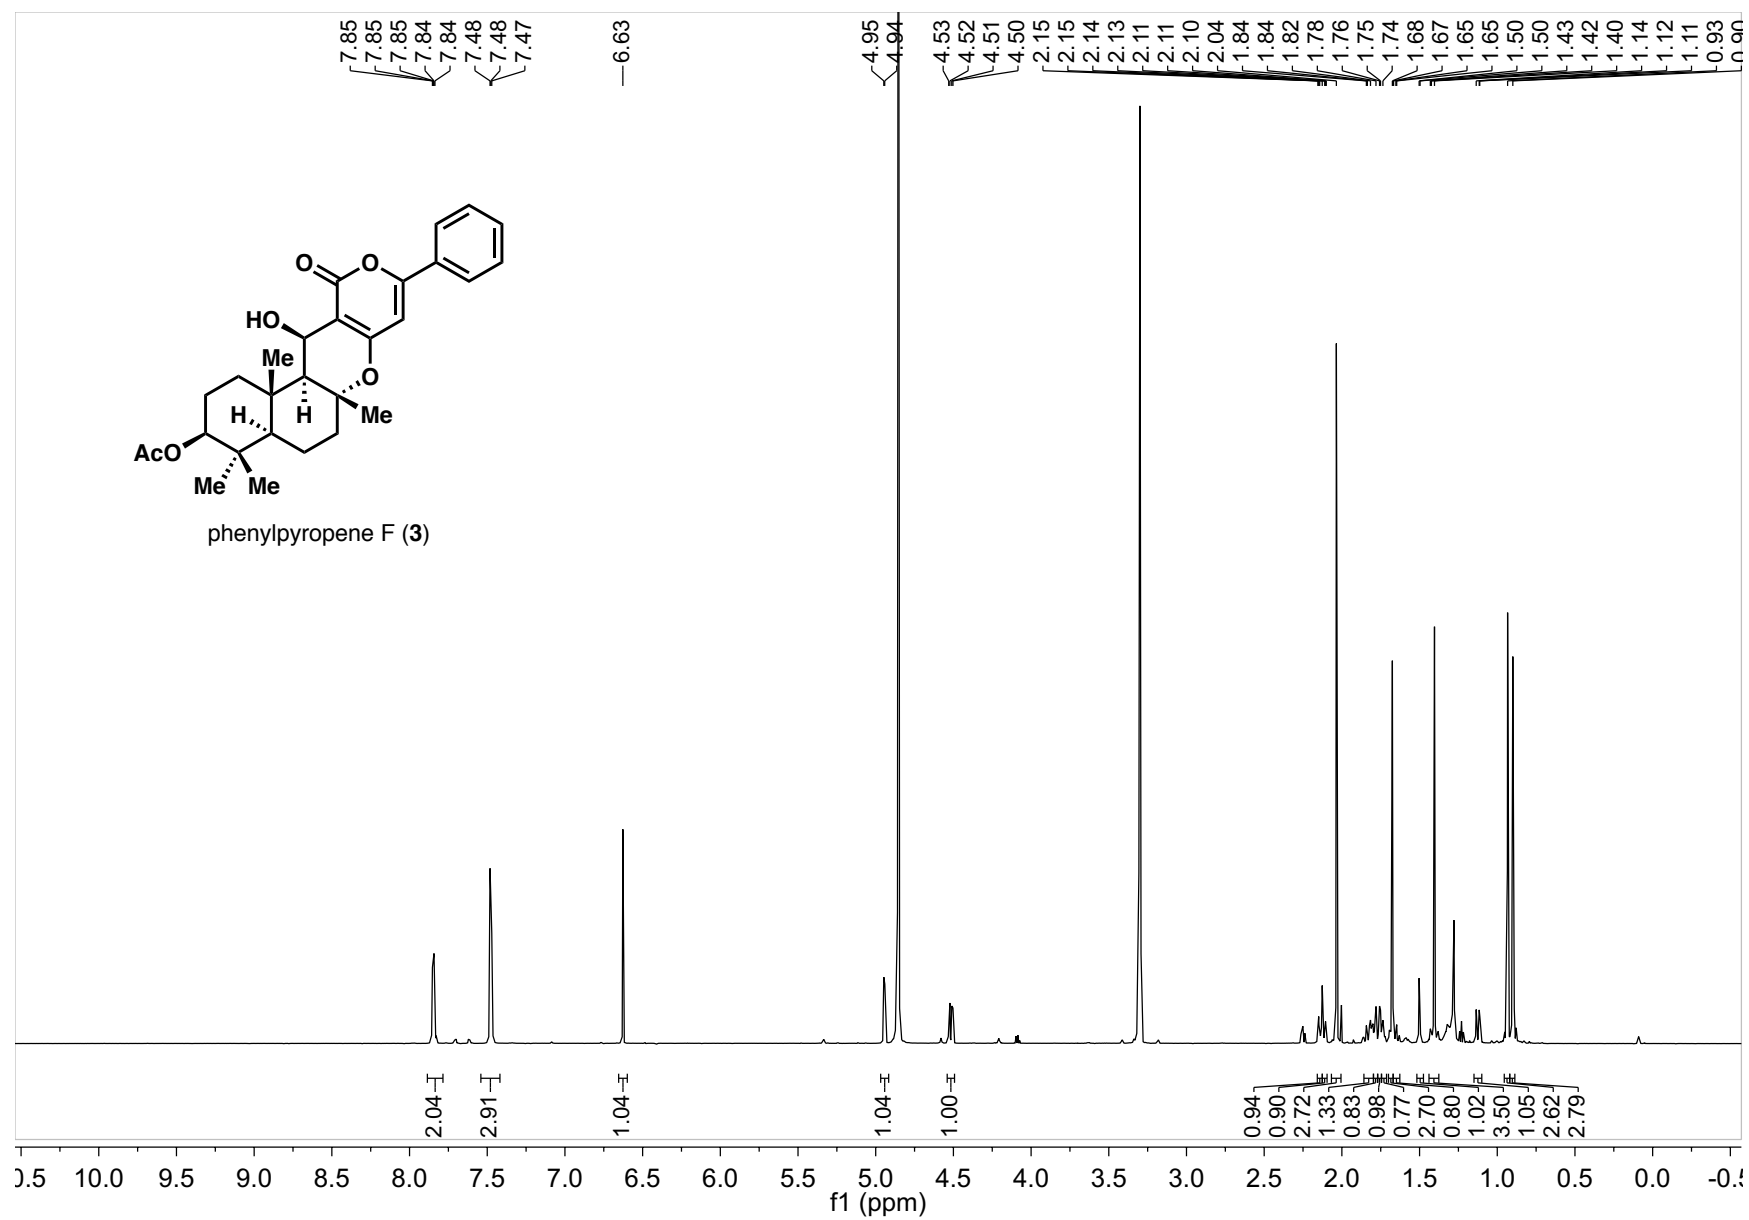

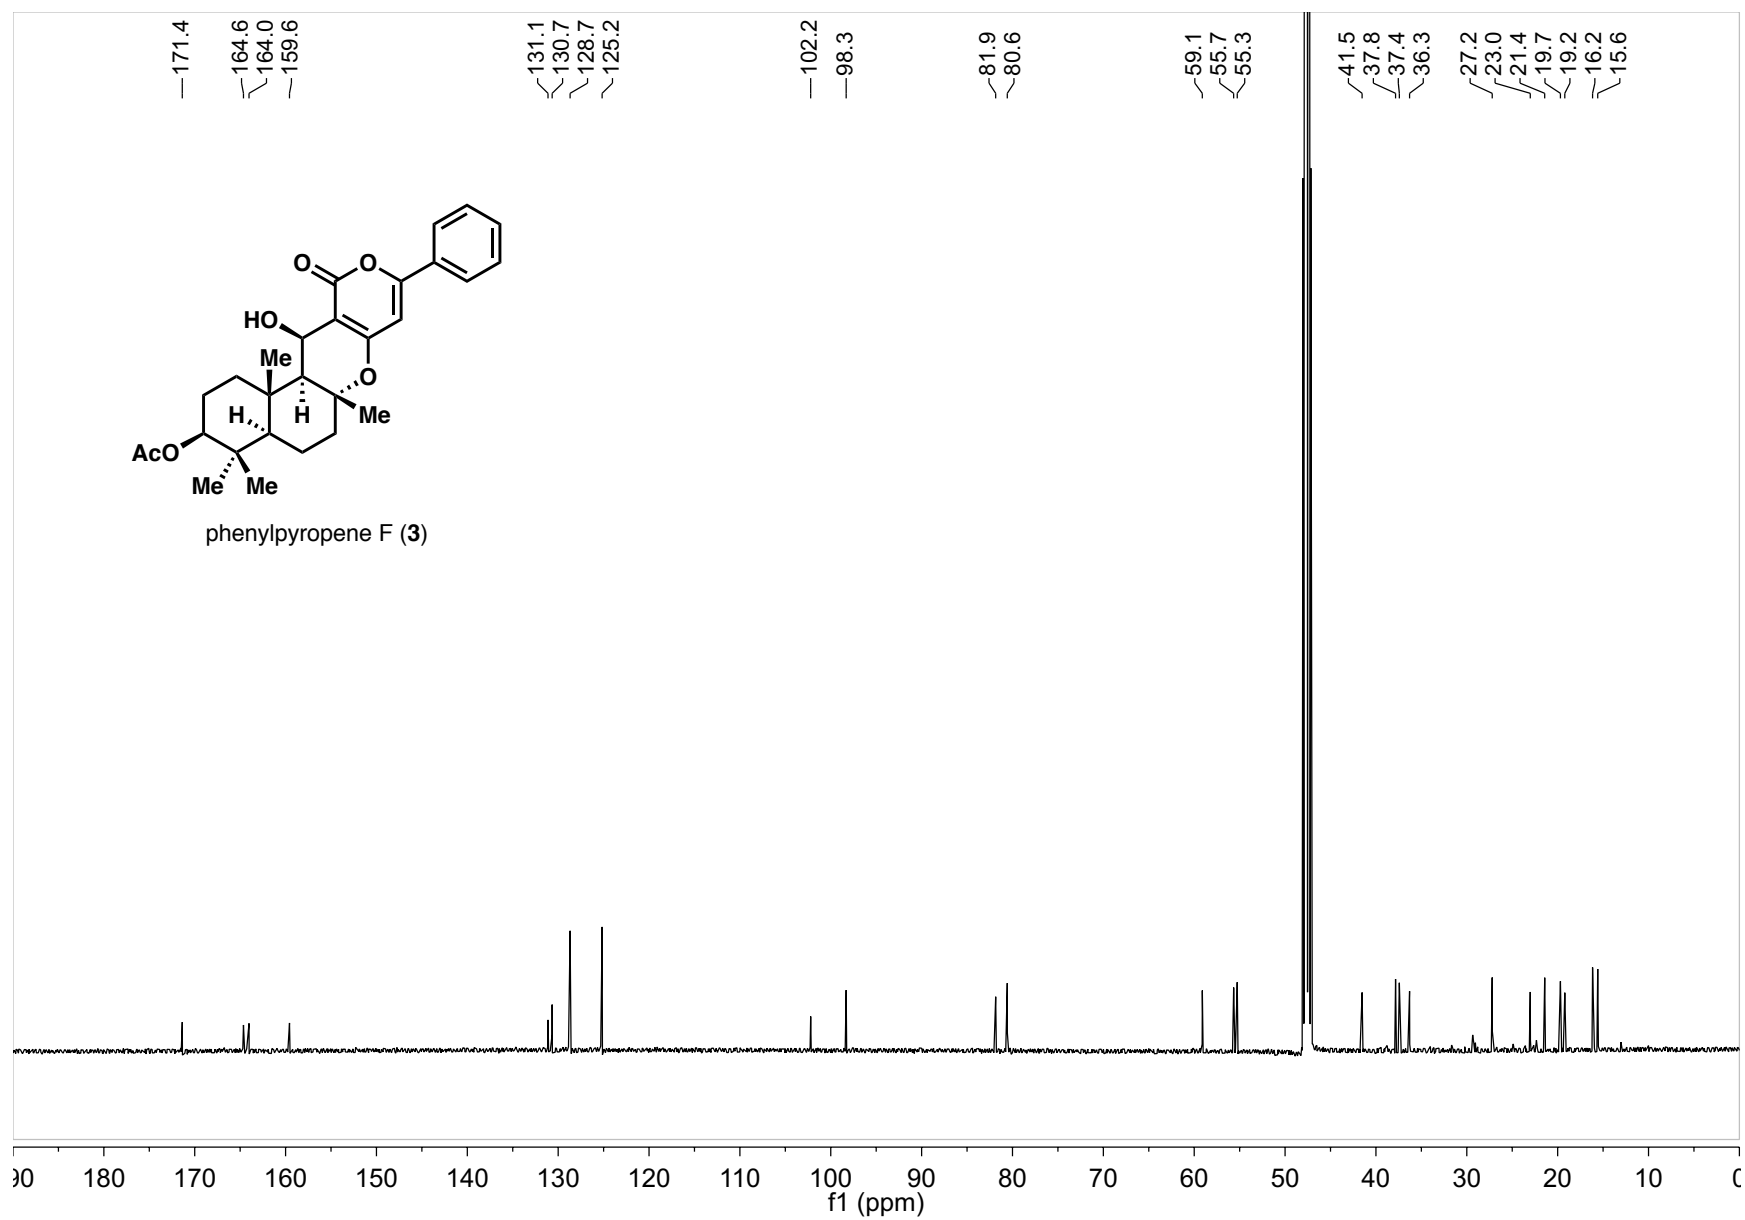

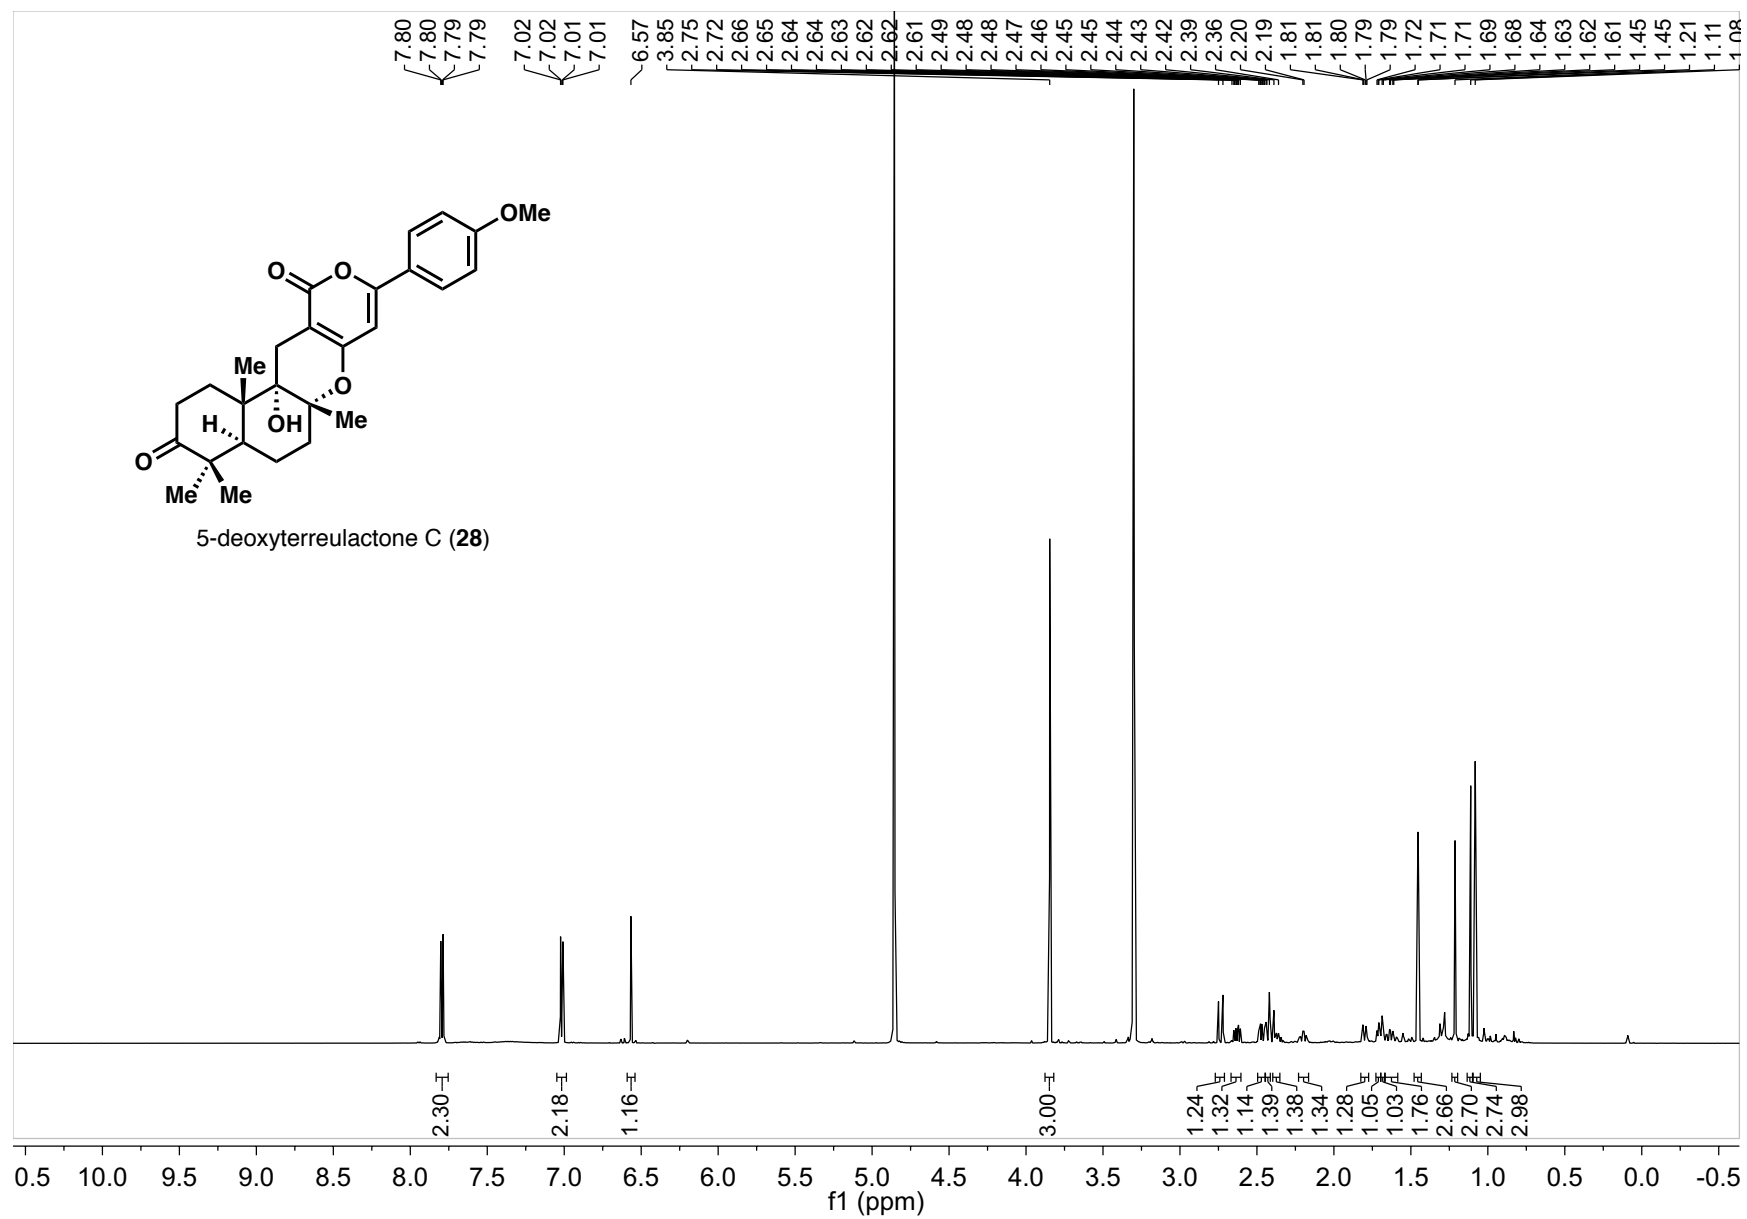

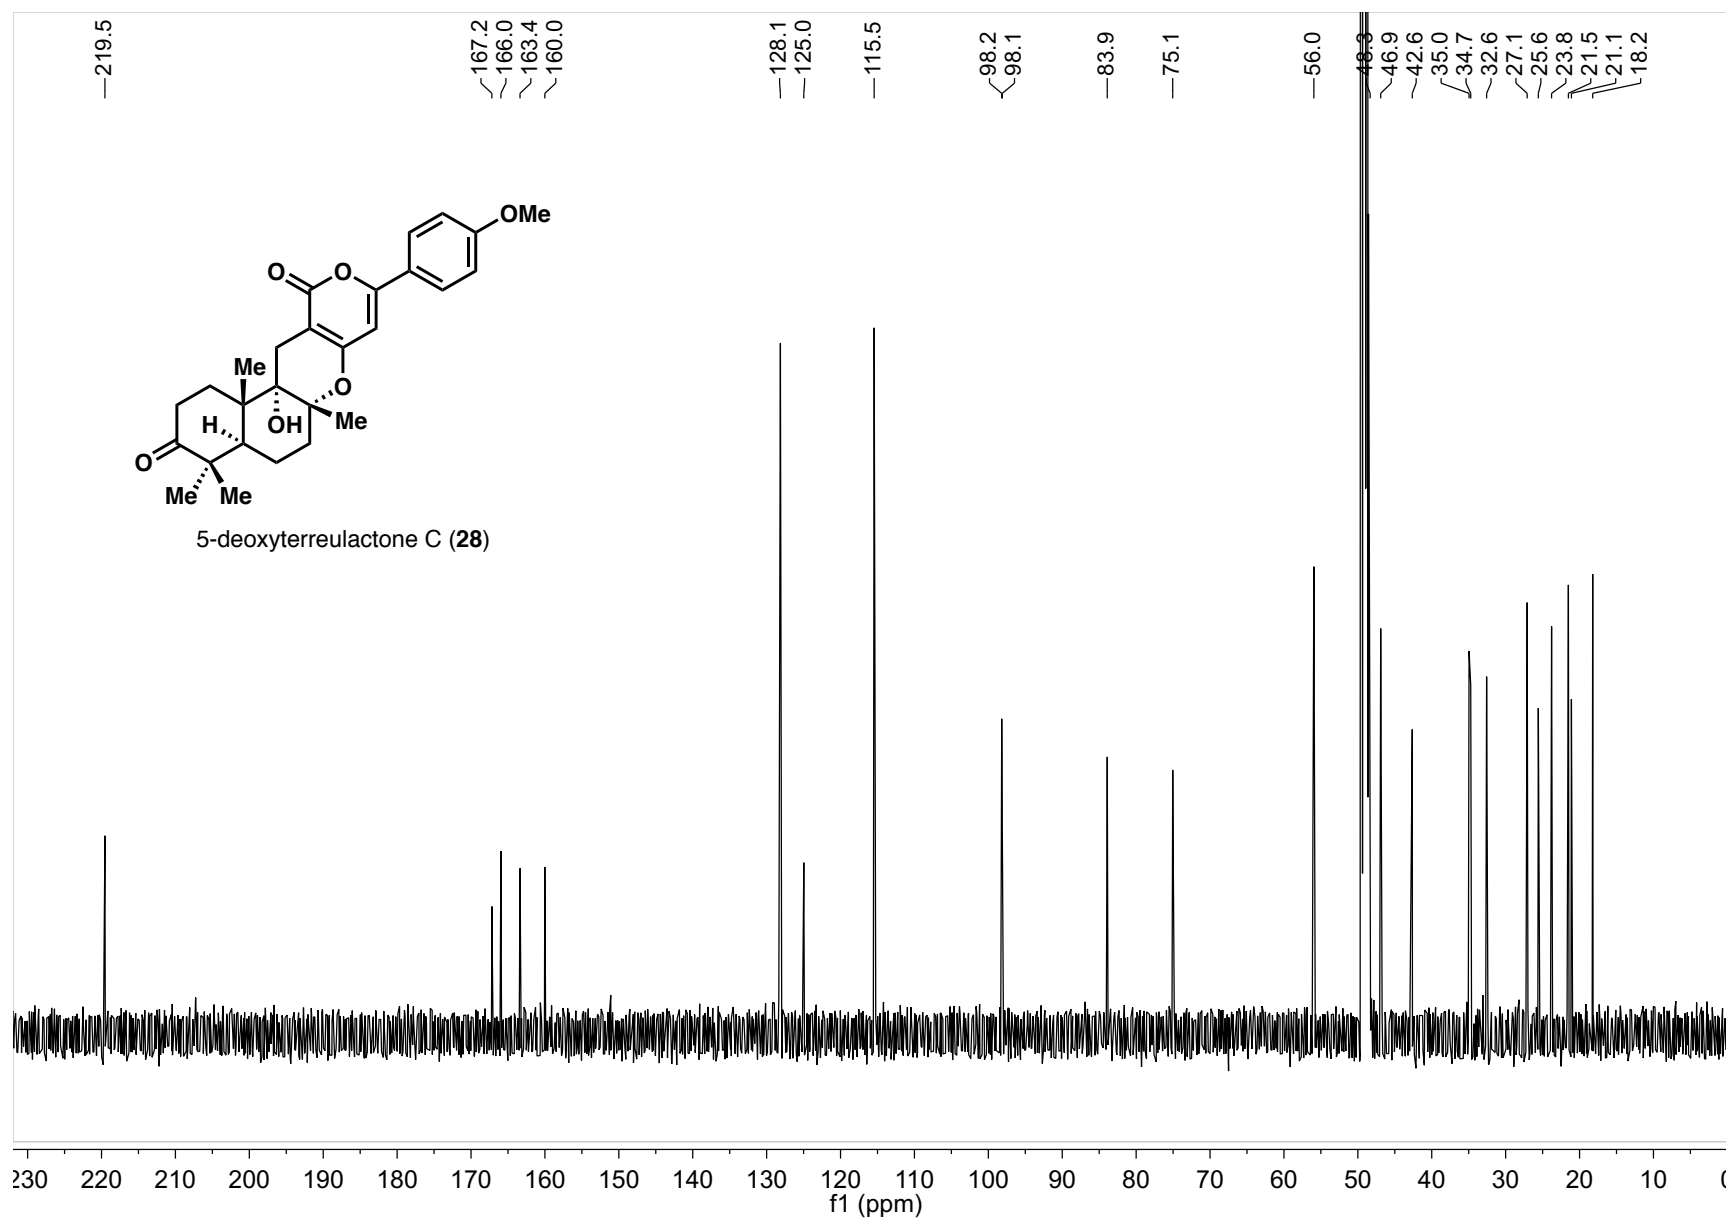

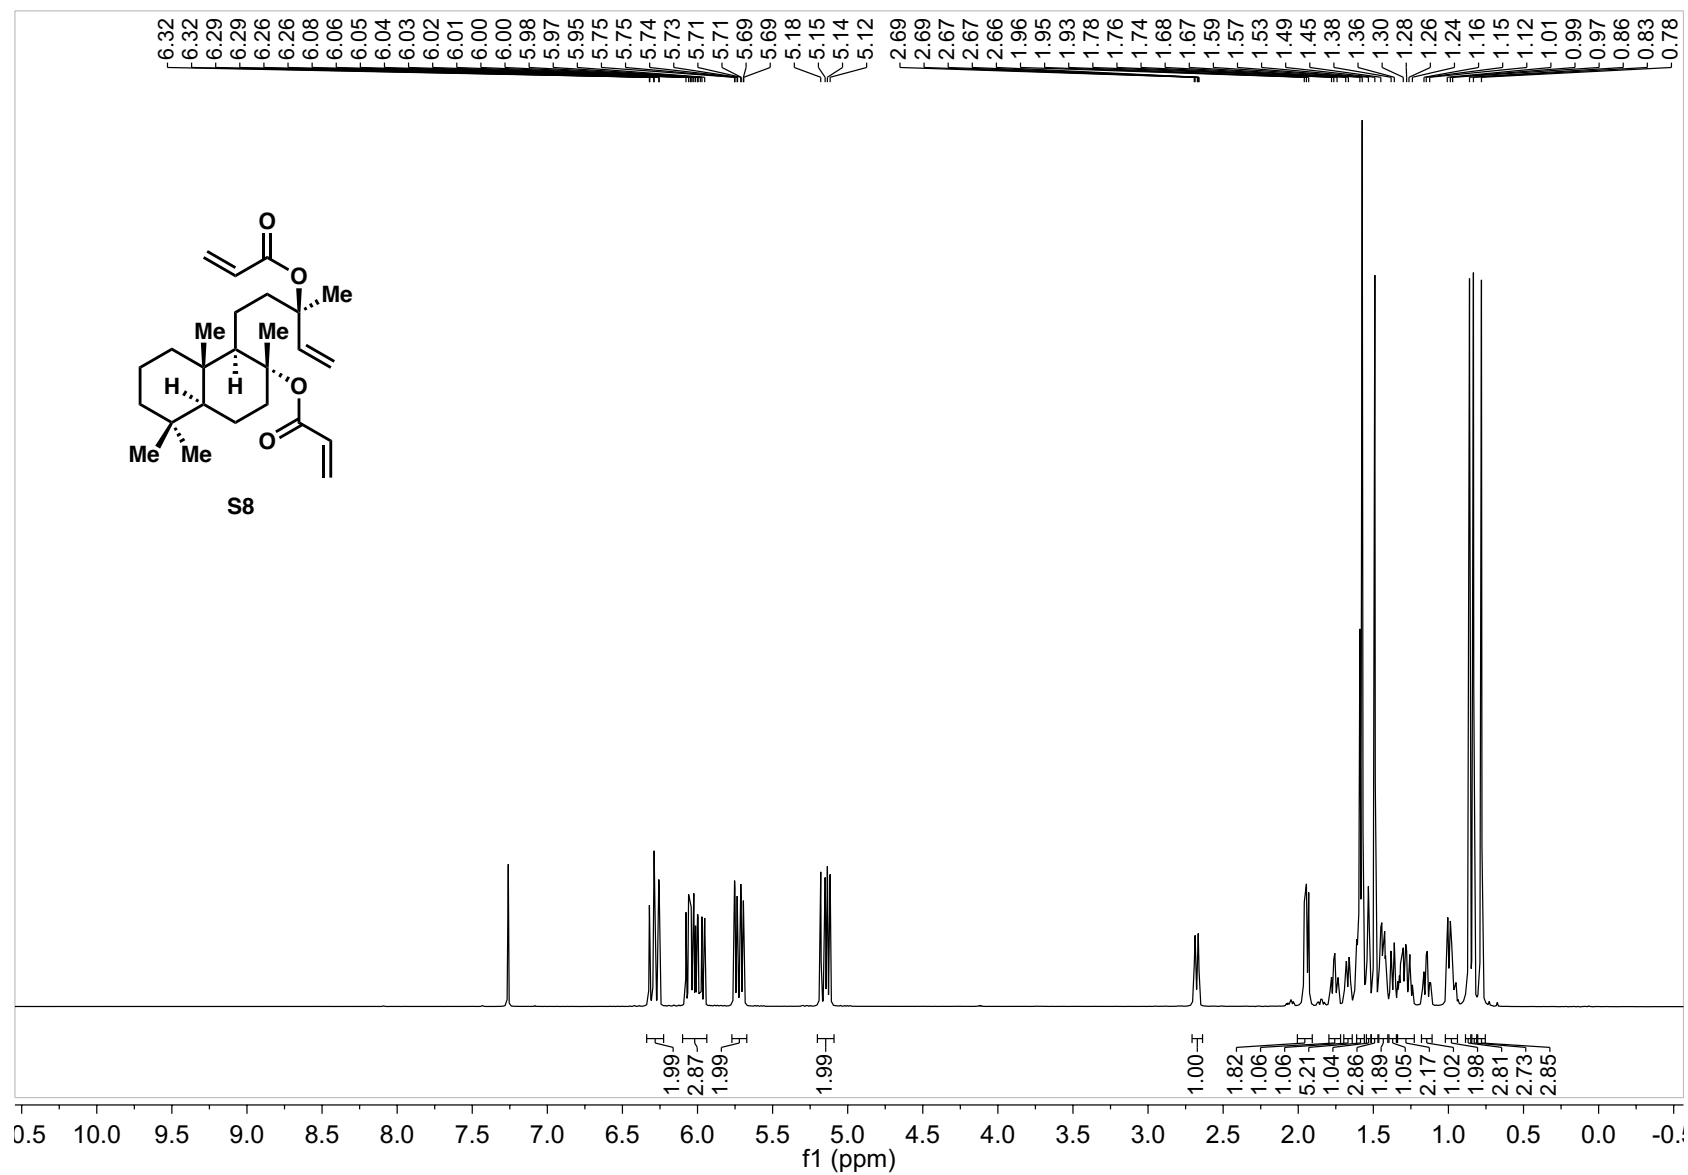

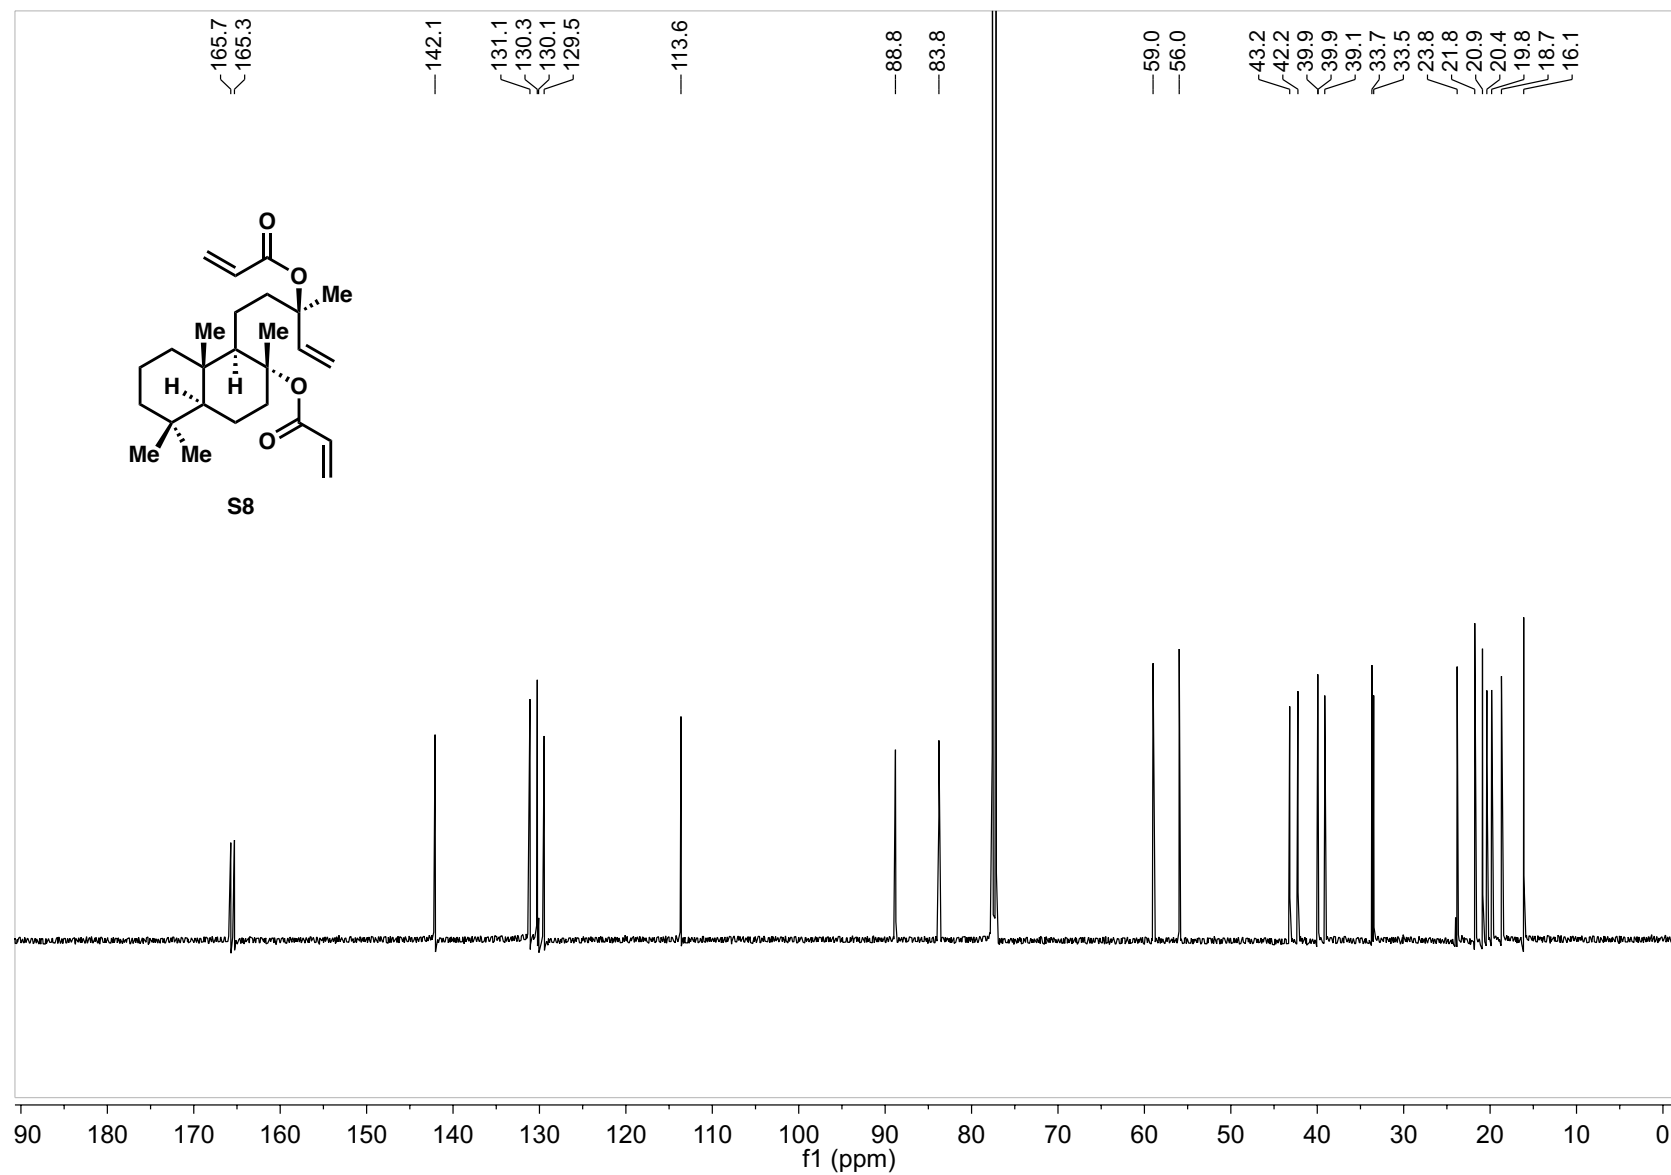

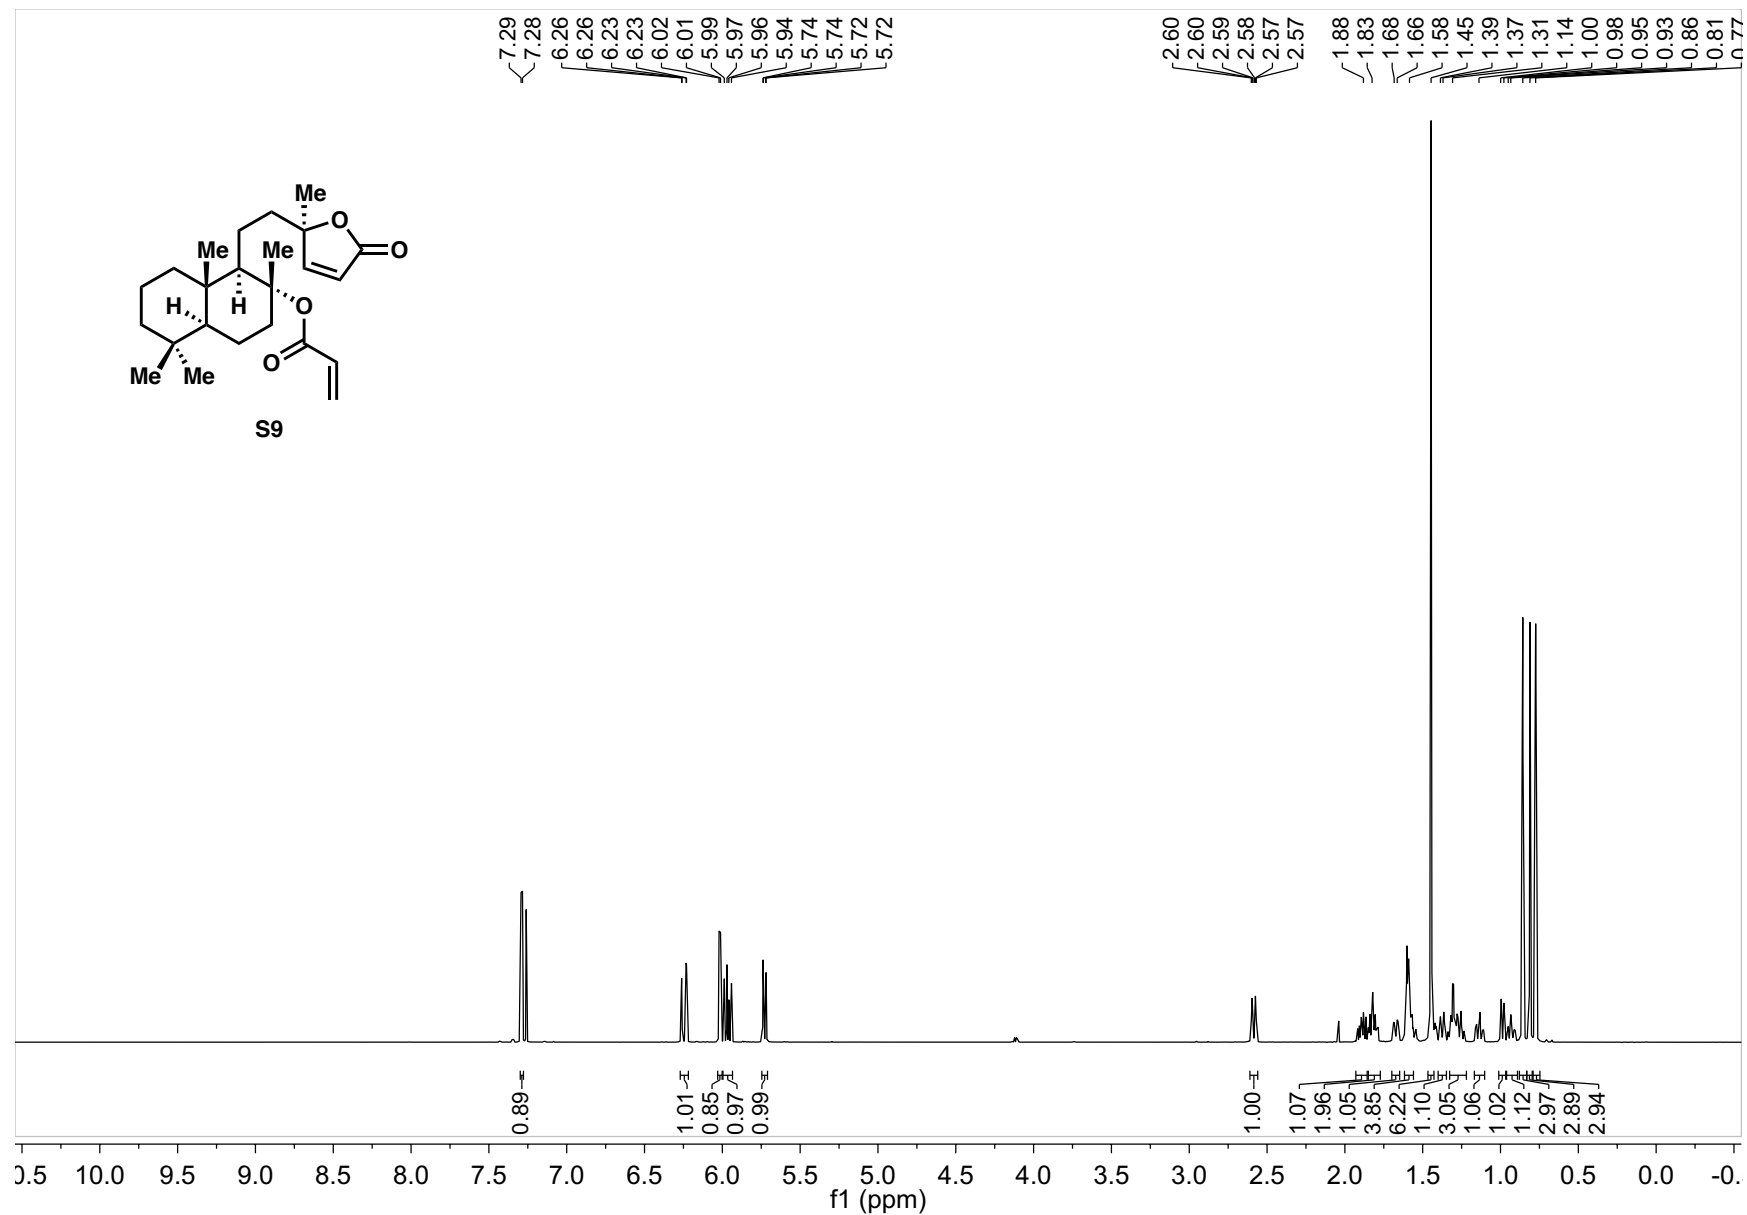

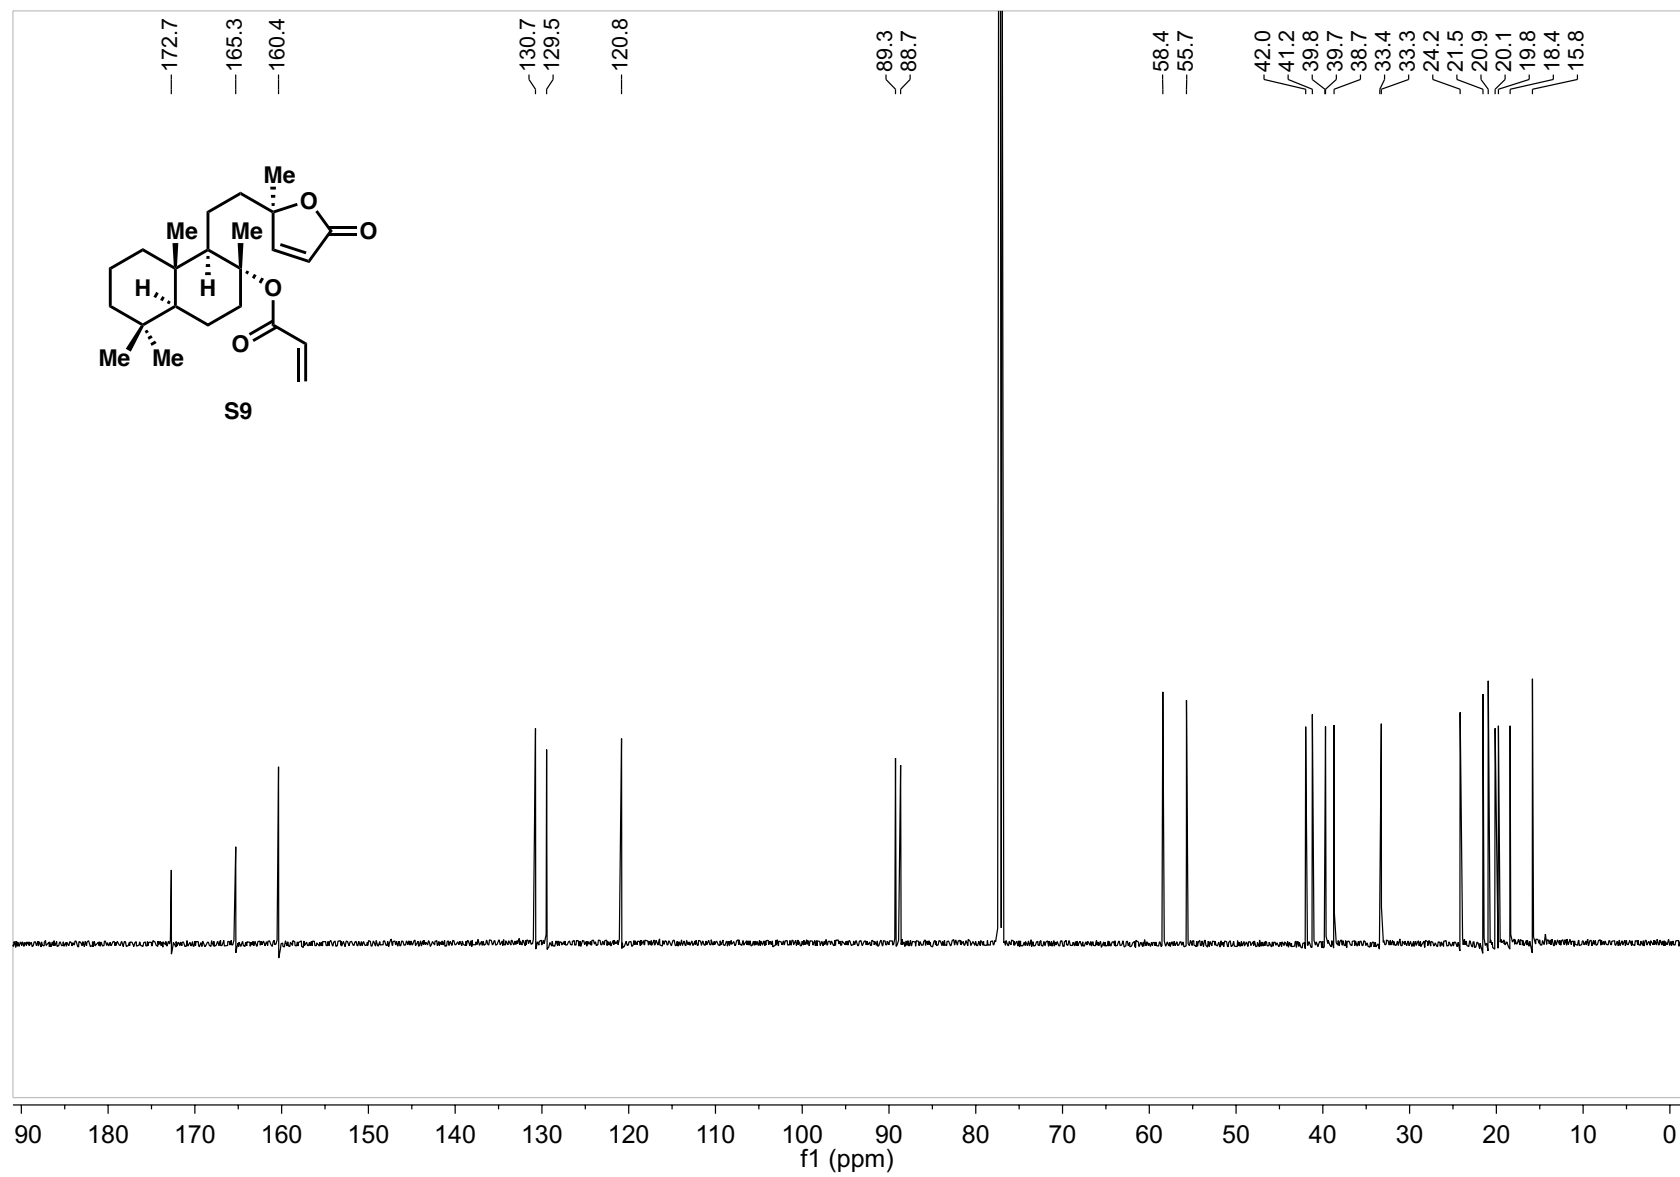

Supplement: NIHMS1546019-supplement-1546019_SuppInfo_Supp_Tab1-9.pdf [file NIHMS1546019-supplement-1546019_SuppInfo_Supp_Tab1-9.pdf]
